# Supplementary material for: Spatial and temporal dynamics of SAR11 marine bacteria across a nearshore to offshore transect in the tropical Pacific Ocean
Source: PeerJ. 2021 Nov 4;9:e12274. doi: 10.7717/peerj.12274 (PMC8572523; doi:10.7717/peerj.12274)
Supplement: Supplemental Information 1 — Table S1. Comparisons of water column parameters and cellular counts over time and space using one-way ANOVA with Tukey’s multiple comparisons test. Significance (Holm corrected p-values) are shown. Table S2. Read depth per sample. Table S3. Comparisons of read depth over time and space using one-way ANOVA with Tukey’s multiple comparisonstest. Significance (Holm corrected p-values) are shown. Table S4.Comparisons of sequencing depth across stations using one-way ANOVA with Tukey’s multiple comparisons test. Significance (Holm corrected p-values) are shown. Table S5. Detection of SAR11 ASVs across the three KByT environment types: coastal, transition, and offshore. Taxonomy was assigned in SILVA v132. SAR11 ASVs were assigned to subclades through phylogenetic placement as described in the methods. Table S6. Comparisons of the relative abundance of the top 14 most abundant orders. Significant DESeq2 normalized differences across environments are shown. Table S7. Number of SAR11 ASVs detected across KByT. Table S8: Summary of SAR11 ASVs recovered from KByT. ASVs with significant DESeq2 normalized differences across environments and seasons within each environment (C = coastal, T = transition, and O = offshore) are noted. Table S9. Summary of KByT ASVs that match isolated SAR11 strains. [file peerj-09-12274-s001.xlsx]

## Sheet: Table_S1
Table S1. Comparisons of water column parameters and cellular counts over time and space using one-way ANOVA with Tukey's multiple comparisons test. Significance (Holm corrected p-values) are shown.
	Environment			Coastal						Transition						Offshore
	Coastal-Offshore	Transition-Coastal	Transition- Offshore	Spring-Fall	Summer-Fall	Winter-Fall	Summer-Spring	Winter-Spring	Winter-Summer	Spring-Fall	Summer-Fall	Winter-Fall	Summer-Spring	Winter-Spring	Winter-Summer	Spring-Fall	Summer-Fall	Winter-Fall	Summer-Spring	Winter-Spring	Winter-Summer
Seawater temp. (ºC)	0.06	0.159	0.636	0.876	0.001	<0.001	<0.001	<0.001	<0.001	0.025	0.093	<0.001	<0.001	<0.001	<0.001	0.003	0.157	<0.001	<0.001	<0.001	<0.001
pH	0.002	0.841	0.015	0.188	1	1	0.473	0.075	1	1	0.749	0.559	0.545	0.261	1	0.739	0.305	0.739	0.081	0.305	0.7386
Salinity	0.001	0.003	0.76	0.037	0.366	0.578	<0.001	0.002	0.578	0.788	0.271	0.788	0.026	0.271	0.552	0.777	0.174	0.777	0.014	0.281	0.349
Chlorophyll a (µg L-1)	<0.001	<0.001	0.122	1	1	0.773	1	0.312	1	1	1	1	1	1	1	1	1	1	1	1	1
Heterotrophic bacteria (cells mL-1)	<0.001	<0.001	0.292	0.0325	0.144	0.585	0.675	0.342	0.585	1	1	1	1	1	1	0.037	1	1	0.223	0.071	1
Synechococcus (cells mL-1)	<0.001	<0.001	0.711	0.025	0.025	1	1	0.012	0.012	0.816	0.816	0.17	0.695	0.049	0.816	1	1	0.395	1	0.06	0.395
Eukaryotic picophytoplankton abundance (cells mL-1)	<0.001	<0.001	0.357	1	1	1	1	1	1	1	1	0.966	1	1	1	1	1	1	1	1	1
Prochlorococcus (cells mL-1)	<0.001	<0.001	<0.001	<0.001	<0.001	<0.001	1	1	1	1	1	1	1	1	1	1	1	1	1	1	1

## Sheet: Table_S2
Table S2. Read depth per sample.
SampleID	Environment	Season	Site	Date	Read Depth
HPAu0034	Coastal	Summer	HP1	2017-08-23	28777
ARAu0035	Coastal	Summer	AR	2017-08-23	22066
SBAu0038	Coastal	Summer	SB	2017-08-23	26068
CB36_R2	Coastal	Summer	CB	2017-08-23	17676
R837_R2	Coastal	Summer	SR8	2017-08-23	16548
NBAu0043	Coastal	Summer	NB	2017-08-23	31379
R2Au0039	Transition	Summer	SR2	2017-08-23	18897
NRAu0042	Transition	Summer	NR2	2017-08-23	14928
STAu0040	Offshore	Summer	STO1	2017-08-23	18320
NTAu0041	Offshore	Summer	NTO1	2017-08-23	19113
HPSe0054	Coastal	Summer	HP1	2017-09-20	29435
ARSe0055	Coastal	Summer	AR	2017-09-20	15548
SB58_R2	Coastal	Summer	SB	2017-09-20	13340
CBSe0056	Coastal	Summer	CB	2017-09-20	22047
R857_R2	Coastal	Summer	SR8	2017-09-20	14065
NBSe0063	Coastal	Summer	NB	2017-09-20	18253
R2Se0059	Transition	Summer	SR2	2017-09-20	15337
NRSe0062	Transition	Summer	NR2	2017-09-20	20848
STSe0060	Offshore	Summer	STO1	2017-09-20	12210
NT61_R2	Offshore	Summer	NTO1	2017-09-20	14839
HPNo0074	Coastal	Fall	HP1	2017-11-01	17217
ARNo0075	Coastal	Fall	AR	2017-11-01	19786
SBNo0078	Coastal	Fall	SB	2017-11-01	25834
CBNo0076	Coastal	Fall	CB	2017-11-01	21461
R8No0077	Coastal	Fall	SR8	2017-11-01	17572
NBNo0083	Coastal	Fall	NB	2017-11-01	21399
R2No0079	Transition	Fall	SR2	2017-11-01	16887
NRNo0082	Transition	Fall	NR2	2017-11-01	12804
STNo0080	Offshore	Fall	STO1	2017-11-01	15439
NTNo0081	Offshore	Fall	NTO1	2017-11-01	20536
HPDe0094	Coastal	Fall	HP1	2017-12-08	15946
ARDe0095	Coastal	Fall	AR	2017-12-08	16105
SBDe0098	Coastal	Fall	SB	2017-12-08	9397
CBDe0096	Coastal	Fall	CB	2017-12-08	26330
R8De0097	Coastal	Fall	SR8	2017-12-08	15219
NBDe0103	Coastal	Fall	NB	2017-12-08	21960
R2De0099	Transition	Fall	SR2	2017-12-08	21166
NRDe0102	Transition	Fall	NR2	2017-12-08	17028
STDe0100	Offshore	Fall	STO1	2017-12-08	27481
NTDe0101	Offshore	Fall	NTO1	2017-12-08	23336
HPJa0116	Coastal	Winter	HP1	2018-01-29	19416
ARJa0117	Coastal	Winter	AR	2018-01-29	28007
SBJa0120	Coastal	Winter	SB	2018-01-29	22702
CBJa0118	Coastal	Winter	CB	2018-01-29	38575
R8Ja0119	Coastal	Winter	SR8	2018-01-29	27964
NBJa0121	Coastal	Winter	NB	2018-01-29	100278
R2Ja0125	Transition	Winter	SR2	2018-01-29	26588
NRJa0124	Transition	Winter	NR2	2018-01-29	48529
STJa0122	Offshore	Winter	STO1	2018-01-29	25737
NTJa0123	Offshore	Winter	NTO1	2018-01-29	14749
HPFe0136	Coastal	Winter	HP1	2018-02-21	21162
ARFe0137	Coastal	Winter	AR	2018-02-21	25124
SBFe0140	Coastal	Winter	SB	2018-02-21	20329
CBFe0138	Coastal	Winter	CB	2018-02-21	22677
R8Fe0139	Coastal	Winter	SR8	2018-02-21	19788
NB145_R2	Coastal	Winter	NB	2018-02-21	18268
R2Fe0141	Transition	Winter	SR2	2018-02-21	22258
NRFe0144	Transition	Winter	NR2	2018-02-21	31807
STFe0142	Offshore	Winter	STO1	2018-02-21	19616
NTFe0143	Offshore	Winter	NTO1	2018-02-21	15432
HP156_R2	Coastal	Winter	HP1	2018-03-28	20177
ARMa0157	Coastal	Winter	AR	2018-03-28	25091
SBMa0160	Coastal	Winter	SB	2018-03-28	36495
CBMa0158	Coastal	Winter	CB	2018-03-28	19273
R8Ma0159	Coastal	Winter	SR8	2018-03-28	18699
NBMa0165	Coastal	Winter	NB	2018-03-28	33635
R2Ma0161	Transition	Winter	SR2	2018-03-28	17515
NRMa0164	Transition	Winter	NR2	2018-03-28	24567
STMa0162	Offshore	Winter	STO1	2018-03-28	38010
NTMa0163	Offshore	Winter	NTO1	2018-03-28	20346
HPMy0176	Coastal	Spring	HP1	2018-05-01	14373
ARMy0177	Coastal	Spring	AR	2018-05-01	24698
SBMy0180	Coastal	Spring	SB	2018-05-01	33036
CB178_R2	Coastal	Spring	CB	2018-05-01	14303
R8My0179	Coastal	Spring	SR8	2018-05-01	36079
NBMy0185	Coastal	Spring	NB	2018-05-01	35084
R2My0181	Transition	Spring	SR2	2018-05-01	25124
NRMy0184	Transition	Spring	NR2	2018-05-01	20969
STMy0182	Offshore	Spring	STO1	2018-05-01	27949
NTMy0183	Offshore	Spring	NTO1	2018-05-01	26581
HPJn0196	Coastal	Spring	HP1	2018-06-01	31379
ARJn0197	Coastal	Spring	AR	2018-06-01	20643
SBJn0200	Coastal	Spring	SB	2018-06-01	48511
CBJn0198	Coastal	Spring	CB	2018-06-01	33620
R8Jn0199	Coastal	Spring	SR8	2018-06-01	35366
NBJn0205	Coastal	Spring	NB	2018-06-01	35038
R2Jn0201	Transition	Spring	SR2	2018-06-01	48651
NRJn0204	Transition	Spring	NR2	2018-06-01	53805
STJn0202	Offshore	Spring	STO1	2018-06-01	49602
NTJn0203	Offshore	Spring	NTO1	2018-06-01	48285
HPJn0216	Coastal	Spring	HP1	2018-06-19	42668
ARJn0217	Coastal	Spring	AR	2018-06-19	39323
SBJn0220	Coastal	Spring	SB	2018-06-19	29292
CBJn0218	Coastal	Spring	CB	2018-06-19	72204
R8Jn0219	Coastal	Spring	SR8	2018-06-19	51862
NBJn0225	Coastal	Spring	NB	2018-06-19	20289
R2Jn0242	Transition	Spring	SR2	2018-06-19	26283
NRJn0224	Transition	Spring	NR2	2018-06-19	28553
STJn0222	Offshore	Spring	STO1	2018-06-19	18316
NTJn0223	Offshore	Spring	NTO1	2018-06-19	24195
HPJy0244	Coastal	Summer	HP1	2018-07-23	19181
ARJy0245	Coastal	Summer	AR	2018-07-23	17343
SBJy0248	Coastal	Summer	SB	2018-07-23	19838
CBJy0246	Coastal	Summer	CB	2018-07-23	19848
R8Jy0247	Coastal	Summer	SR8	2018-07-23	25626
NBJy0253	Coastal	Summer	NB	2018-07-23	19345
R2Jy0249	Transition	Summer	SR2	2018-07-23	20836
NRJy0252	Transition	Summer	NR2	2018-07-23	26360
STJy0250	Offshore	Summer	STO1	2018-07-23	15714
NTJy0251	Offshore	Summer	NTO1	2018-07-23	21503
HPSe0264	Coastal	Summer	HP1	2018-09-11	20229
ARSe0265	Coastal	Summer	AR	2018-09-11	11459
SBSe0268	Coastal	Summer	SB	2018-09-11	25556
CBSe0266	Coastal	Summer	CB	2018-09-11	17905
R8Se0267	Coastal	Summer	SR8	2018-09-11	16641
NBSe0273	Coastal	Summer	NB	2018-09-11	16001
R2Se0269	Transition	Summer	SR2	2018-09-11	21778
NRSe0272	Transition	Summer	NR2	2018-09-11	14996
STSe0270	Offshore	Summer	STO1	2018-09-11	22307
NTSe0271	Offshore	Summer	NTO1	2018-09-11	21747
HPOc0290	Coastal	Fall	HP1	2018-10-11	13872
AROc0291	Coastal	Fall	AR	2018-10-11	14705
SBOc0294	Coastal	Fall	SB	2018-10-11	14365
CB292_R2	Coastal	Fall	CB	2018-10-11	16586
R8Oc0293	Coastal	Fall	SR8	2018-10-11	16275
NBOc0299	Coastal	Fall	NB	2018-10-11	18615
R2Oc0295	Transition	Fall	SR2	2018-10-11	38945
NROc0298	Transition	Fall	NR2	2018-10-11	19499
STOc0296	Offshore	Fall	STO1	2018-10-11	18854
NT297_R2	Offshore	Fall	NTO1	2018-10-11	13468
HPNo0322	Coastal	Fall	HP1	2018-11-09	17172
ARNo0323	Coastal	Fall	AR	2018-11-09	22475
SBNo0326	Coastal	Fall	SB	2018-11-09	13459
CBNo0324	Coastal	Fall	CB	2018-11-09	30918
R8No0325	Coastal	Fall	SR8	2018-11-09	30130
NBNo0331	Coastal	Fall	NB	2018-11-09	19998
R2No0327	Transition	Fall	SR2	2018-11-09	18269
NR330_R2	Transition	Fall	NR2	2018-11-09	13870
STNo0328	Offshore	Fall	STO1	2018-11-09	21830
NTNo0329	Offshore	Fall	NTO1	2018-11-09	22234
HPJa0354	Coastal	Winter	HP1	2019-01-11	21544
ARJa0355	Coastal	Winter	AR	2019-01-11	21250
SBJa0358	Coastal	Winter	SB	2019-01-11	23518
CBJa0356	Coastal	Winter	CB	2019-01-11	32704
R8Ja0357	Coastal	Winter	SR8	2019-01-11	28965
NBJa0363	Coastal	Winter	NB	2019-01-11	9392
R2Ja0359	Transition	Winter	SR2	2019-01-11	30701
NRJa0362	Transition	Winter	NR2	2019-01-11	20353
STJa0360	Offshore	Winter	STO1	2019-01-11	17527
NTJa0361	Offshore	Winter	NTO1	2019-01-11	22102
HPFe0386	Coastal	Winter	HP1	2019-02-25	30705
ARFe0387	Coastal	Winter	AR	2019-02-25	23750
SBFe0390	Coastal	Winter	SB	2019-02-25	22784
CBFe0388	Coastal	Winter	CB	2019-02-25	32604
R8389_R2	Coastal	Winter	SR8	2019-02-25	26136
NBFe0395	Coastal	Winter	NB	2019-02-25	30926
R2Fe0391	Transition	Winter	SR2	2019-02-25	35311
NRFe0394	Transition	Winter	NR2	2019-02-25	36612
STFe0392	Offshore	Winter	STO1	2019-02-25	29682
NTFe0393	Offshore	Winter	NTO1	2019-02-25	39996
HPMa0418	Coastal	Winter	HP1	2019-03-21	30522
AR419_R2	Coastal	Winter	AR	2019-03-21	24463
SBMa0422	Coastal	Winter	SB	2019-03-21	43053
CBMa0420	Coastal	Winter	CB	2019-03-21	37755
R8Ma0421	Coastal	Winter	SR8	2019-03-21	49371
NBMa0427	Coastal	Winter	NB	2019-03-21	46734
R2Ma0423	Transition	Winter	SR2	2019-03-21	31134
NRMa0426	Transition	Winter	NR2	2019-03-21	26263
STMa0449	Offshore	Winter	STO1	2019-03-21	26136
NTMa0425	Offshore	Winter	NTO1	2019-03-21	31256
HPAp0450	Coastal	Spring	HP1	2019-04-22	22039
ARAp0451	Coastal	Spring	AR	2019-04-22	21679
SBAp0454	Coastal	Spring	SB	2019-04-22	21232
CBAp0452	Coastal	Spring	CB	2019-04-22	17546
R8Ap0453	Coastal	Spring	SR8	2019-04-22	20146
NBAp0459	Coastal	Spring	NB	2019-04-22	19187
R2Ap0455	Transition	Spring	SR2	2019-04-22	21866
NRAp0458	Transition	Spring	NR2	2019-04-22	26525
STAp0480	Offshore	Spring	STO1	2019-04-22	30357
NTAp0457	Offshore	Spring	NTO1	2019-04-22	28457
HPMy0487	Coastal	Spring	HP1	2019-05-21	21518
ARMy0488	Coastal	Spring	AR	2019-05-21	28708
SBMy0491	Coastal	Spring	SB	2019-05-21	66675
CBMy0489	Coastal	Spring	CB	2019-05-21	34545
R8My0490	Coastal	Spring	SR8	2019-05-21	37851
NBMy0486	Coastal	Spring	NB	2019-05-21	17644
R2My0482	Transition	Spring	SR2	2019-05-21	35893
NRMy0485	Transition	Spring	NR2	2019-05-21	31329
STMy0483	Offshore	Spring	STO1	2019-05-21	21260
NTMy0484	Offshore	Spring	NTO1	2019-05-21	22266
HPJn0507	Coastal	Spring	HP1	2019-06-14	23799
ARJn0508	Coastal	Spring	AR	2019-06-14	26467
SBJn0511	Coastal	Spring	SB	2019-06-14	25647
CBJn0509	Coastal	Spring	CB	2019-06-14	33283
R8Jn0510	Coastal	Spring	SR8	2019-06-14	35758
NBJn0506	Coastal	Spring	NB	2019-06-14	28365
R2Jn0502	Transition	Spring	SR2	2019-06-14	32460
NRJn0505	Transition	Spring	NR2	2019-06-14	37902
STJn0503	Offshore	Spring	STO1	2019-06-14	31286
NTJn0504	Offshore	Spring	NTO1	2019-06-14	30544

## Sheet: Table_S3
Table S3. Comparisons of read depth over time and space using one-way ANOVA with Tukey's multiple comparisons test. Significance (Holm corrected p-values) are shown.
		adjusted p-value
Environment	Coastal-Offshore	1
	Transition-Coastal	1
	Transition- Offshore	1
Season	Spring-Fall	<0.001
	Summer-Fall	0.952
	Winter-Fall	<0.001
	Summer-Spring	<0.001
	Winter-Spring	0.285
	Winter-Summer	<0.001
Coastal	Spring-Fall	<0.001
	Summer-Fall	0.991
	Winter-Fall	0.004
	Summer-Spring	0.002
	Winter-Spring	0.991
	Winter-Summer	0.009
Transition	Spring-Fall	0.01
	Summer-Fall	0.894
	Winter-Fall	0.052
	Summer-Spring	0.008
	Winter-Spring	0.725
	Winter-Summer	0.049
Offshore	Spring-Fall	0.044
	Summer-Fall	0.567
	Winter-Fall	0.37
	Summer-Spring	0.01
	Winter-Spring	0.366
	Winter-Summer	0.22

## Sheet: Table_S4
Table S4. Comparisons of sequencing depth across stations using one-way ANOVA with Tukey's multiple comparisons test. Significance (Holm corrected p-values) are shown.
			Adjusted p-value
Site	Mean	Standard deviation	HP1	AR	SB	CB	SR8	NB	SR2	NR2	STO1	NTO1
HP1	23057	7163	-	1	1	1	1	1	1	1	1	1
AR	22435	6083	1	-	1	1	1	1	1	1	1	1
SB	27057	13474	1	1	-	1	1	1	1	1	1	1
CB	28093	12983	1	1	1	-	1	1	1	1	1	1
SR8	27003	11185	1	1	1	1	-	1	1	1	1	1
NB	28090	19136	1	1	1	1	1	-	1	1	1	1
SR2	26295	8684	1	1	1	1	1	1	-	1	1	1
NR2	26377	11180	1	1	1	1	1	1	1	-	1	1
STO1	24382	8760	1	1	1	1	1	1	1	1	-	1
NTO1	24049	8560	1	1	1	1	1	1	1	1	1	-

## Sheet: Table_S5
Table S5. ASV table of detection occurrence in the three environment types: coastal, transition, and offshore. Taxonomy was assigned in SILVA v132. SAR11 ASVs were assigned to subclades through phylogenetic placement as described in the methods.
ASV	Domain	Phylum	Class	Order	Family	Genus	Species	Assigned SAR11 Subclade	Coastal samples detected (n=120)	Transition samples detected (n=40)	Offshore samples detected (n=40)
ASV1	Bacteria	Proteobacteria	Alphaproteobacteria	SAR11 clade	Clade IV			Clade IV	1	2	6
ASV2	Bacteria	Proteobacteria	Alphaproteobacteria	SAR11 clade	Clade IV			Clade IV	20	0	1
ASV3	Bacteria	Proteobacteria	Alphaproteobacteria	SAR11 clade	Clade IV			Clade IV	10	1	0
ASV4	Bacteria	Proteobacteria	Alphaproteobacteria	SAR11 clade	Clade IV			Clade IV	86	31	40
ASV5	Bacteria	Proteobacteria	Alphaproteobacteria	SAR11 clade	Clade III	Ambiguous_taxa	Ambiguous_taxa	Clade IIIa	1	5	19
ASV6	Bacteria	Proteobacteria	Alphaproteobacteria	SAR11 clade	Clade III	Ambiguous_taxa	Ambiguous_taxa	Clade IIIa	0	2	5
ASV7	Bacteria	Proteobacteria	Alphaproteobacteria	SAR11 clade	Clade III	Ambiguous_taxa	Ambiguous_taxa	Clade IIIa	0	5	4
ASV8	Bacteria	Proteobacteria	Alphaproteobacteria	SAR11 clade	Clade III			Clade IIIa	20	3	0
ASV9	Bacteria	Proteobacteria	Alphaproteobacteria	SAR11 clade	Clade III			Clade IIIa	21	8	3
ASV10	Bacteria	Proteobacteria	Alphaproteobacteria	SAR11 clade	Clade III			Clade IIIa	119	35	29
ASV11	Bacteria	Proteobacteria	Alphaproteobacteria	SAR11 clade	Clade III	Ambiguous_taxa	Ambiguous_taxa	Clade IIIa	118	35	18
ASV12	Bacteria	Proteobacteria	Alphaproteobacteria	SAR11 clade	Clade I	Clade Ia		Clade Ia	5	4	2
ASV13	Bacteria	Proteobacteria	Alphaproteobacteria	SAR11 clade	Clade I	Clade Ia		Clade Ia	41	3	0
ASV14	Bacteria	Proteobacteria	Alphaproteobacteria	SAR11 clade	Clade I	Clade Ia		Clade Ia	13	0	0
ASV15	Bacteria	Proteobacteria	Alphaproteobacteria	SAR11 clade	Clade I	Clade Ia		Clade Ia	2	0	0
ASV16	Bacteria	Proteobacteria	Alphaproteobacteria	SAR11 clade	Clade I	Clade Ia		Clade Ia	120	39	36
ASV17	Bacteria	Proteobacteria	Alphaproteobacteria	SAR11 clade	Clade I	Clade Ia		Clade Ia	0	0	6
ASV18	Bacteria	Proteobacteria	Alphaproteobacteria	SAR11 clade	Clade I	Clade Ia		Clade Ia	87	39	40
ASV19	Bacteria	Proteobacteria	Alphaproteobacteria	SAR11 clade	Clade I	Clade Ia		Clade Ia	11	8	29
ASV20	Bacteria	Proteobacteria	Alphaproteobacteria	SAR11 clade	Clade I	Clade Ia		Clade Ia	82	23	3
ASV21	Bacteria	Proteobacteria	Alphaproteobacteria	SAR11 clade	Clade I	Clade Ia		Clade Ia	3	0	0
ASV22	Bacteria	Proteobacteria	Alphaproteobacteria	SAR11 clade	Clade I	Clade Ia		Clade Ia	16	2	2
ASV23	Bacteria	Proteobacteria	Alphaproteobacteria	SAR11 clade	Clade I	Clade Ia		Clade Ia	0	0	2
ASV24	Bacteria	Proteobacteria	Alphaproteobacteria	SAR11 clade	Clade I	Clade Ia		Clade Ia	0	0	2
ASV25	Bacteria	Proteobacteria	Alphaproteobacteria	SAR11 clade	Clade I	Clade Ia		Clade Ia	9	0	0
ASV26	Bacteria	Proteobacteria	Alphaproteobacteria	SAR11 clade	Clade I	Clade Ia		Clade Ia	2	0	0
ASV27	Bacteria	Proteobacteria	Alphaproteobacteria	SAR11 clade	Clade I	Clade Ib		Clade Ib	0	0	3
ASV28	Bacteria	Proteobacteria	Alphaproteobacteria	SAR11 clade	Clade I	Clade Ib		Clade Ib	0	1	15
ASV29	Bacteria	Proteobacteria	Alphaproteobacteria	SAR11 clade	Clade I	Clade Ib		Clade Ib	8	20	38
ASV30	Bacteria	Proteobacteria	Alphaproteobacteria	SAR11 clade	Clade I			Clade Ib	1	7	22
ASV31	Bacteria	Proteobacteria	Alphaproteobacteria	SAR11 clade	Clade I	Clade Ib		Clade Ib	0	0	2
ASV32	Bacteria	Proteobacteria	Alphaproteobacteria	SAR11 clade	Clade I	Clade Ib		Clade Ib	0	0	2
ASV33	Bacteria	Proteobacteria	Alphaproteobacteria	SAR11 clade	Clade I	Clade Ib		Clade Ib	0	8	31
ASV34	Bacteria	Proteobacteria	Alphaproteobacteria	SAR11 clade	Clade I			Clade Ib	35	36	40
ASV35	Bacteria	Proteobacteria	Alphaproteobacteria	SAR11 clade	Clade I			Clade Ib	1	15	35
ASV36	Bacteria	Proteobacteria	Alphaproteobacteria	SAR11 clade	Clade I			Clade Ib	1	12	34
ASV37	Bacteria	Proteobacteria	Alphaproteobacteria	SAR11 clade	Clade I	Clade Ib		Clade Ib	0	3	10
ASV38	Bacteria	Proteobacteria	Alphaproteobacteria	SAR11 clade	Clade I	Clade Ib		Clade Ib	0	0	2
ASV39	Bacteria	Proteobacteria	Alphaproteobacteria	SAR11 clade	Clade I			Clade Ib	0	0	8
ASV40	Bacteria	Proteobacteria	Alphaproteobacteria	SAR11 clade	Clade I	Clade Ib		Clade Ib	0	1	2
ASV41	Bacteria	Proteobacteria	Alphaproteobacteria	SAR11 clade	Clade I	Clade Ib		Clade Ib	0	6	24
ASV42	Bacteria	Proteobacteria	Alphaproteobacteria	SAR11 clade	Clade I	Clade Ib		Clade Ib	0	0	6
ASV43	Bacteria	Proteobacteria	Alphaproteobacteria	SAR11 clade	Clade I	Clade Ib		Clade Ib	12	27	39
ASV44	Bacteria	Proteobacteria	Alphaproteobacteria	SAR11 clade	Clade I	Clade Ib		Clade Ib	0	0	6
ASV45	Bacteria	Proteobacteria	Alphaproteobacteria	SAR11 clade	Clade I	Clade Ib		Clade Ib	1	0	1
ASV46	Bacteria	Proteobacteria	Alphaproteobacteria	SAR11 clade	Clade I	Clade Ib		Clade Ib	0	3	15
ASV47	Bacteria	Proteobacteria	Alphaproteobacteria	SAR11 clade	Clade I	Clade Ia		Clade Ia	120	40	40
ASV48	Bacteria	Proteobacteria	Alphaproteobacteria	SAR11 clade	Clade I	Clade Ia		Clade Ia	11	2	0
ASV49	Bacteria	Proteobacteria	Alphaproteobacteria	SAR11 clade	Clade I	Clade Ia		Clade Ia	0	0	3
ASV50	Bacteria	Proteobacteria	Alphaproteobacteria	SAR11 clade	Clade I	Clade Ia		Clade Ia	21	3	0
ASV51	Bacteria	Proteobacteria	Alphaproteobacteria	SAR11 clade	Clade I	Clade Ia		Clade Ia	0	0	2
ASV52	Bacteria	Proteobacteria	Alphaproteobacteria	SAR11 clade	Clade I	Clade Ia		Clade Ia	14	10	8
ASV53	Bacteria	Proteobacteria	Alphaproteobacteria	SAR11 clade	Clade II			Clade IIb	0	0	3
ASV54	Bacteria	Proteobacteria	Alphaproteobacteria	SAR11 clade	Clade II			Clade IIb	0	0	3
ASV55	Bacteria	Proteobacteria	Alphaproteobacteria	SAR11 clade	Clade II			Clade IIa	1	2	20
ASV56	Bacteria	Proteobacteria	Alphaproteobacteria	SAR11 clade	Clade II			Clade IIa	0	0	4
ASV57	Bacteria	Proteobacteria	Alphaproteobacteria	SAR11 clade	Clade II			Clade IIa	0	2	5
ASV58	Bacteria	Proteobacteria	Alphaproteobacteria	SAR11 clade	Clade II			Clade IIa	3	15	31
ASV59	Bacteria	Proteobacteria	Alphaproteobacteria	SAR11 clade	Clade II			Clade IIa	0	1	5
ASV60	Bacteria	Proteobacteria	Alphaproteobacteria	SAR11 clade	Clade II			Clade IIa	1	2	7
ASV61	Bacteria	Proteobacteria	Alphaproteobacteria	SAR11 clade	Clade II			Clade IIa	0	2	5
ASV62	Bacteria	Proteobacteria	Alphaproteobacteria	SAR11 clade	Clade II			Clade IIa	0	0	2
ASV63	Bacteria	Proteobacteria	Alphaproteobacteria	SAR11 clade	Clade II			Clade IIa	0	0	3
ASV64	Bacteria	Proteobacteria	Alphaproteobacteria	SAR11 clade	Clade II			Clade IIa	0	2	3
ASV65	Bacteria	Proteobacteria	Alphaproteobacteria	SAR11 clade	Clade II			Clade IIa	0	0	4
ASV66	Bacteria	Proteobacteria	Alphaproteobacteria	SAR11 clade	Clade II			Clade IIa	0	2	16
ASV67	Bacteria	Proteobacteria	Alphaproteobacteria	SAR11 clade				Clade IIa	0	3	9
ASV68	Bacteria	Proteobacteria	Alphaproteobacteria	SAR11 clade	Clade II			Clade IIa	5	0	0
ASV69	Bacteria	Proteobacteria	Alphaproteobacteria	SAR11 clade	Clade II	unidentified marine bacterioplankton	unidentified marine bacterioplankton	Clade IIa	41	7	14
ASV70	Bacteria	Proteobacteria	Alphaproteobacteria	SAR11 clade	Clade II			Clade IIa	57	6	1
ASV71	Bacteria	Proteobacteria	Alphaproteobacteria	SAR11 clade	Clade II			Clade IIa	34	5	0
ASV72	Bacteria	Proteobacteria	Alphaproteobacteria	SAR11 clade	Clade II			Clade IIa	6	0	0
ASV73	Bacteria	Proteobacteria	Alphaproteobacteria	SAR11 clade	Clade II			Clade IIa	8	0	0
ASV74	Bacteria	Proteobacteria	Alphaproteobacteria	SAR11 clade	Clade II			Clade IIa	4	20	37
ASV75	Bacteria	Proteobacteria	Alphaproteobacteria	SAR11 clade	Clade II			Clade IIa	1	3	15
ASV76	Bacteria	Proteobacteria	Alphaproteobacteria	SAR11 clade	Clade II			Clade IIa	3	0	0
ASV77	Bacteria	Proteobacteria	Alphaproteobacteria	SAR11 clade	Clade II			Clade IIa	3	0	0
ASV78	Bacteria	Proteobacteria	Alphaproteobacteria	SAR11 clade	Clade II			Clade IIa	120	40	40
ASV79	Bacteria	Proteobacteria	Alphaproteobacteria	SAR11 clade	Clade II			Clade IIa	15	0	0
ASV80	Bacteria	Proteobacteria	Alphaproteobacteria	SAR11 clade	Clade II			Clade IIa	0	2	7
ASV81	Bacteria	Proteobacteria	Alphaproteobacteria	SAR11 clade	Clade II			Clade IIa	0	1	1
ASV82	Bacteria	Proteobacteria	Alphaproteobacteria	SAR11 clade	Clade II			Clade IIa	2	2	4
ASV83	Bacteria	Proteobacteria	Alphaproteobacteria	SAR11 clade	Clade II			Clade IIa	0	1	4
ASV84	Bacteria	Proteobacteria	Alphaproteobacteria	SAR11 clade	Clade II			Clade IIa	0	0	2
ASV85	Bacteria	Proteobacteria	Alphaproteobacteria	SAR11 clade	Clade II	SAR11 cluster bacterium PRT-SC02	SAR11 cluster bacterium PRT-SC02	Clade IIa	1	2	12
ASV86	Bacteria	Proteobacteria	Alphaproteobacteria	SAR11 clade	Clade II			Clade IIa	3	19	34
ASV87	Bacteria	Proteobacteria	Alphaproteobacteria	SAR11 clade	Clade II			Clade IIa	0	4	8
ASV88	Bacteria	Proteobacteria	Alphaproteobacteria	SAR11 clade	Clade II			Clade IIa	0	1	1
ASV89	Bacteria	Proteobacteria	Alphaproteobacteria	SAR11 clade	Clade II			Clade IIa	0	0	3
ASV90	Bacteria	Proteobacteria	Alphaproteobacteria	SAR11 clade	Clade II			Clade IIa	0	1	3
ASV91	Bacteria	Proteobacteria	Alphaproteobacteria	SAR11 clade	Clade II			Clade IIa	0	0	2
ASV92	Bacteria	Proteobacteria	Alphaproteobacteria	SAR11 clade	Clade II			Clade IIa	1	2	17
ASV93	Bacteria	Proteobacteria	Alphaproteobacteria	SAR11 clade	Clade II			Clade IIa	0	1	1
ASV94	Bacteria	Proteobacteria	Alphaproteobacteria	SAR11 clade	Clade II			Clade IIa	0	0	2
ASV95	Bacteria	Proteobacteria	Alphaproteobacteria	SAR11 clade	Clade II			Clade IIa	2	0	0
ASV96	Bacteria	Proteobacteria	Alphaproteobacteria	Rhodospirillale	AEGEAN-169 marine group	Ambiguous_taxa	Ambiguous_taxa	Clade Va	120	30	13
ASV97	Bacteria	Proteobacteria	Alphaproteobacteria	Rhodospirillale	AEGEAN-169 marine group	Ambiguous_taxa	Ambiguous_taxa	Clade Va	2	21	39
ASV98	Bacteria	Proteobacteria	Alphaproteobacteria	Rhodospirillale	AEGEAN-169 marine group	Ambiguous_taxa	Ambiguous_taxa	Clade Va	16	1	0
ASV99	Bacteria	Proteobacteria	Alphaproteobacteria	Rhodospirillale	AEGEAN-169 marine group	uncultured marine bacterium	uncultured marine bacterium	Clade Vb	108	10	8
ASV100	Bacteria	Proteobacteria	Alphaproteobacteria	Rhodospirillale	AEGEAN-169 marine group			Clade Vb	32	4	14
ASV101	Bacteria	Proteobacteria	Alphaproteobacteria	Rhodospirillale	AEGEAN-169 marine group	unidentified marine bacterioplankton	unidentified marine bacterioplankton	Clade Vb	11	0	2
ASV102	Bacteria	Proteobacteria	Alphaproteobacteria	Rhodospirillale	AEGEAN-169 marine group	unidentified marine bacterioplankton	unidentified marine bacterioplankton	Clade Vb	1	4	14
ASV103	Bacteria	Proteobacteria	Alphaproteobacteria	Rhodospirillale	AEGEAN-169 marine group	unidentified marine bacterioplankton	unidentified marine bacterioplankton	Clade Vb	68	24	34
ASV104	Bacteria	Proteobacteria	Alphaproteobacteria	Rhodospirillale	AEGEAN-169 marine group			Clade Vb	9	13	27
ASV105	Bacteria	Proteobacteria	Alphaproteobacteria	Rhodospirillale	AEGEAN-169 marine group			Clade Vb	7	0	0
ASV106	Bacteria	Proteobacteria	Alphaproteobacteria	Rhodospirillale	AEGEAN-169 marine group			Clade Vb	0	0	2
ASV107	Bacteria	Cyanobacteria	Oxyphotobacteria	Synechococcales	Cyanobiaceae	Synechococcus CC9902			120	40	40
ASV108	Bacteria	Cyanobacteria	Oxyphotobacteria	Synechococcales	Cyanobiaceae	Synechococcus CC9902			120	34	18
ASV109	Bacteria	Cyanobacteria	Oxyphotobacteria	Synechococcales	Cyanobiaceae	Synechococcus CC9902			102	18	14
ASV110	Bacteria	Cyanobacteria	Oxyphotobacteria	Synechococcales	Cyanobiaceae	Synechococcus CC9902	Ambiguous_taxa		109	23	9
ASV111	Bacteria	Cyanobacteria	Oxyphotobacteria	Synechococcales	Cyanobiaceae	Synechococcus CC9902	Ambiguous_taxa		92	17	16
ASV112	Bacteria	Cyanobacteria	Oxyphotobacteria	Synechococcales	Cyanobiaceae	Synechococcus CC9902			34	5	6
ASV113	Bacteria	Cyanobacteria	Oxyphotobacteria	Synechococcales	Cyanobiaceae	Synechococcus CC9902			13	1	0
ASV114	Bacteria	Cyanobacteria	Oxyphotobacteria	Synechococcales	Cyanobiaceae	Synechococcus CC9902			44	0	0
ASV115	Bacteria	Cyanobacteria	Oxyphotobacteria	Synechococcales	Cyanobiaceae	Synechococcus CC9902			10	2	0
ASV116	Bacteria	Cyanobacteria	Oxyphotobacteria	Synechococcales	Cyanobiaceae	Prochlorococcus MIT9313			69	40	40
ASV117	Bacteria	Cyanobacteria	Oxyphotobacteria	Synechococcales	Cyanobiaceae	Prochlorococcus MIT9313			16	25	40
ASV118	Bacteria	Cyanobacteria	Oxyphotobacteria	Synechococcales	Cyanobiaceae	Prochlorococcus MIT9313			0	4	24
ASV119	Bacteria	Cyanobacteria	Oxyphotobacteria	Synechococcales	Cyanobiaceae	Prochlorococcus MIT9313			0	1	15
ASV120	Bacteria	Cyanobacteria	Oxyphotobacteria	Synechococcales	Cyanobiaceae	Prochlorococcus MIT9313			0	1	11
ASV121	Bacteria	Cyanobacteria	Oxyphotobacteria	Synechococcales	Cyanobiaceae	Prochlorococcus MIT9313			0	0	14
ASV122	Bacteria	Cyanobacteria	Oxyphotobacteria	Synechococcales	Cyanobiaceae	Prochlorococcus MIT9313			0	1	15
ASV123	Bacteria	Cyanobacteria	Oxyphotobacteria	Synechococcales	Cyanobiaceae	Prochlorococcus MIT9313			0	2	4
ASV124	Bacteria	Cyanobacteria	Oxyphotobacteria	Synechococcales	Cyanobiaceae	Prochlorococcus MIT9313			0	1	7
ASV125	Bacteria	Cyanobacteria	Oxyphotobacteria	Synechococcales	Cyanobiaceae	Prochlorococcus MIT9313			0	1	5
ASV126	Bacteria	Cyanobacteria	Oxyphotobacteria	Synechococcales	Cyanobiaceae	Prochlorococcus MIT9313			0	0	8
ASV127	Bacteria	Cyanobacteria	Oxyphotobacteria	Synechococcales	Cyanobiaceae	Prochlorococcus MIT9313			0	0	5
ASV128	Bacteria	Cyanobacteria	Oxyphotobacteria	Synechococcales	Cyanobiaceae	Prochlorococcus MIT9313			0	0	4
ASV129	Bacteria	Acidobacteria	Subgroup 26	uncultured bacterium	uncultured bacterium	uncultured bacterium	uncultured bacterium		2	2	0
ASV130	Bacteria	Actinobacteria	Acidimicrobiia	Actinomarinales	Actinomarinaceae	Candidatus Actinomarina	uncultured marine bacterium		0	5	18
ASV131	Bacteria	Actinobacteria	Acidimicrobiia	Actinomarinales	Actinomarinaceae	Candidatus Actinomarina			14	5	24
ASV132	Bacteria	Actinobacteria	Acidimicrobiia	Actinomarinales	Actinomarinaceae	Candidatus Actinomarina			108	34	40
ASV133	Bacteria	Actinobacteria	Acidimicrobiia	Actinomarinales	Actinomarinaceae	Candidatus Actinomarina			5	0	0
ASV134	Bacteria	Actinobacteria	Acidimicrobiia	Actinomarinales	Actinomarinaceae	Candidatus Actinomarina			108	15	4
ASV135	Bacteria	Actinobacteria	Acidimicrobiia	Microtrichales	Ilumatobacteraceae	uncultured	Ambiguous_taxa		2	0	0
ASV136	Bacteria	Actinobacteria	Acidimicrobiia	Microtrichales	Ilumatobacteraceae	uncultured	Ambiguous_taxa		3	1	0
ASV137	Bacteria	Actinobacteria	Acidimicrobiia	Microtrichales	Ilumatobacteraceae	uncultured	Ambiguous_taxa		39	6	4
ASV138	Bacteria	Actinobacteria	Acidimicrobiia	Microtrichales	Ilumatobacteraceae	uncultured			2	0	0
ASV139	Bacteria	Actinobacteria	Acidimicrobiia	Microtrichales	Ilumatobacteraceae	uncultured			27	4	2
ASV140	Bacteria	Actinobacteria	Acidimicrobiia	Microtrichales	Microtrichaceae	Sva0996 marine group	Ambiguous_taxa		0	0	3
ASV141	Bacteria	Actinobacteria	Acidimicrobiia	Microtrichales	Microtrichaceae	Sva0996 marine group	uncultured bacterium		20	1	0
ASV142	Bacteria	Actinobacteria	Acidimicrobiia	Microtrichales	Microtrichaceae	Sva0996 marine group	uncultured marine bacterium		1	5	23
ASV143	Bacteria	Actinobacteria	Acidimicrobiia	Microtrichales	Microtrichaceae	Sva0996 marine group	uncultured marine bacterium		0	5	9
ASV144	Bacteria	Actinobacteria	Acidimicrobiia	Microtrichales	Microtrichaceae	Sva0996 marine group	uncultured marine bacterium		0	2	2
ASV145	Bacteria	Actinobacteria	Acidimicrobiia	Microtrichales	Microtrichaceae	Sva0996 marine group			0	0	3
ASV146	Bacteria	Actinobacteria	Acidimicrobiia	Microtrichales	Microtrichaceae	Sva0996 marine group			0	0	3
ASV147	Bacteria	Actinobacteria	Acidimicrobiia	Microtrichales	Microtrichaceae	Sva0996 marine group			0	8	20
ASV148	Bacteria	Actinobacteria	Acidimicrobiia	Microtrichales	Microtrichaceae	Sva0996 marine group			116	24	6
ASV149	Bacteria	Actinobacteria	Actinobacteria	Frankiales	Sporichthyaceae				2	0	0
ASV150	Bacteria	Actinobacteria	Actinobacteria	Micrococcales	Microbacteriaceae	Candidatus Aquiluna	uncultured bacterium		17	3	1
ASV151	Bacteria	Actinobacteria	Actinobacteria	Micrococcales	Microbacteriaceae				2	0	0
ASV152	Bacteria	Actinobacteria	Actinobacteria	PeM15	uncultured Actinomycetales bacterium	uncultured Actinomycetales bacterium	uncultured Actinomycetales bacterium		19	6	11
ASV153	Bacteria	Actinobacteria							4	0	0
ASV154	Bacteria	Bacteroidetes	Bacteroidia	Bacteroidales	Bacteroidaceae	Bacteroides	uncultured marine bacterium		2	0	0
ASV155	Bacteria	Bacteroidetes	Bacteroidia	Bacteroidales	Bacteroidetes BD2-2				9	25	6
ASV156	Bacteria	Bacteroidetes	Bacteroidia	Bacteroidales	Marinifilaceae	Marinifilum			1	1	0
ASV157	Bacteria	Bacteroidetes	Bacteroidia	Bacteroidales	Marinifilaceae	Odoribacter	uncultured bacterium		0	3	0
ASV158	Bacteria	Bacteroidetes	Bacteroidia	Bacteroidales	Marinifilaceae	uncultured	uncultured bacterium		2	0	0
ASV159	Bacteria	Bacteroidetes	Bacteroidia	Bacteroidales	Marinilabiliaceae	Carboxylicivirga	uncultured bacterium		4	0	0
ASV160	Bacteria	Bacteroidetes	Bacteroidia	Bacteroidales	Marinilabiliaceae	Labilibacter	uncultured Bacteroidetes bacterium		1	3	1
ASV161	Bacteria	Bacteroidetes	Bacteroidia	Bacteroidales	Prolixibacteraceae	Roseimarinus	uncultured Bacteroidetes bacterium		4	3	0
ASV162	Bacteria	Bacteroidetes	Bacteroidia	Bacteroidales	Prolixibacteraceae	Roseimarinus	uncultured Bacteroidetes bacterium		2	7	3
ASV163	Bacteria	Bacteroidetes	Bacteroidia	Bacteroidales	Prolixibacteraceae	Roseimarinus	uncultured Bacteroidetes bacterium		12	2	0
ASV164	Bacteria	Bacteroidetes	Bacteroidia	Bacteroidales	Prolixibacteraceae	Roseimarinus	uncultured Bacteroidetes bacterium		1	1	0
ASV165	Bacteria	Bacteroidetes	Bacteroidia	Bacteroidales	Prolixibacteraceae	Roseimarinus	uncultured Bacteroidetes bacterium		0	1	1
ASV166	Bacteria	Bacteroidetes	Bacteroidia	Bacteroidales	Prolixibacteraceae	Roseimarinus			2	1	0
ASV167	Bacteria	Bacteroidetes	Bacteroidia	Bacteroidales	Prolixibacteraceae				0	4	1
ASV168	Bacteria	Bacteroidetes	Bacteroidia	Bacteroidales	Prolixibacteraceae				0	6	0
ASV169	Bacteria	Bacteroidetes	Bacteroidia	Bacteroidales	Rikenellaceae	Alistipes	uncultured bacterium		1	1	0
ASV170	Bacteria	Bacteroidetes	Bacteroidia	Bacteroidales	Rikenellaceae	Alistipes	uncultured bacterium		0	2	0
ASV171	Bacteria	Bacteroidetes	Bacteroidia	Bacteroidales	Rikenellaceae	Alistipes	uncultured bacterium		1	1	0
ASV172	Bacteria	Bacteroidetes	Bacteroidia	Bacteroidales	Tannerellaceae	Macellibacteroides	uncultured bacterium		1	4	0
ASV173	Bacteria	Bacteroidetes	Bacteroidia	Bacteroidales	Tannerellaceae	Macellibacteroides	uncultured bacterium		0	3	0
ASV174	Bacteria	Bacteroidetes	Bacteroidia	Bacteroidales	Tannerellaceae	Parabacteroides	Gryllus firmus		0	3	2
ASV175	Bacteria	Bacteroidetes	Bacteroidia	Bacteroidales					0	4	0
ASV176	Bacteria	Bacteroidetes	Bacteroidia	Chitinophagales	Saprospiraceae	Aureispira	Ambiguous_taxa		2	0	3
ASV177	Bacteria	Bacteroidetes	Bacteroidia	Chitinophagales	Saprospiraceae	Aureispira	Ambiguous_taxa		46	3	1
ASV178	Bacteria	Bacteroidetes	Bacteroidia	Chitinophagales	Saprospiraceae	Aureispira	uncultured Sphingobacterium sp.		16	2	1
ASV179	Bacteria	Bacteroidetes	Bacteroidia	Chitinophagales	Saprospiraceae	Aureispira			14	0	2
ASV180	Bacteria	Bacteroidetes	Bacteroidia	Chitinophagales	Saprospiraceae	Lewinella	uncultured marine bacterium		9	1	0
ASV181	Bacteria	Bacteroidetes	Bacteroidia	Chitinophagales	Saprospiraceae	Portibacter	uncultured deep-sea bacterium		0	1	1
ASV182	Bacteria	Bacteroidetes	Bacteroidia	Chitinophagales	Saprospiraceae	Saprospira	uncultured bacterium		5	0	0
ASV183	Bacteria	Bacteroidetes	Bacteroidia	Chitinophagales	Saprospiraceae	uncultured	uncultured bacterium		21	1	1
ASV184	Bacteria	Bacteroidetes	Bacteroidia	Chitinophagales	Saprospiraceae	uncultured	uncultured bacterium		56	2	1
ASV185	Bacteria	Bacteroidetes	Bacteroidia	Chitinophagales	Saprospiraceae	uncultured	uncultured bacterium		0	1	2
ASV186	Bacteria	Bacteroidetes	Bacteroidia	Chitinophagales	Saprospiraceae	uncultured	uncultured bacterium		3	2	0
ASV187	Bacteria	Bacteroidetes	Bacteroidia	Chitinophagales	Saprospiraceae	uncultured	uncultured bacterium		2	1	0
ASV188	Bacteria	Bacteroidetes	Bacteroidia	Chitinophagales	Saprospiraceae	uncultured	uncultured bacterium		16	1	0
ASV189	Bacteria	Bacteroidetes	Bacteroidia	Chitinophagales	Saprospiraceae	uncultured	uncultured Bacteroidetes bacterium		0	2	0
ASV190	Bacteria	Bacteroidetes	Bacteroidia	Chitinophagales	Saprospiraceae	uncultured	unidentified marine eubacterium		0	1	4
ASV191	Bacteria	Bacteroidetes	Bacteroidia	Chitinophagales	Saprospiraceae	uncultured			0	1	3
ASV192	Bacteria	Bacteroidetes	Bacteroidia	Chitinophagales	Saprospiraceae	uncultured			0	2	0
ASV193	Bacteria	Bacteroidetes	Bacteroidia	Chitinophagales	Saprospiraceae	uncultured			0	1	1
ASV194	Bacteria	Bacteroidetes	Bacteroidia	Chitinophagales	Saprospiraceae	uncultured			19	0	1
ASV195	Bacteria	Bacteroidetes	Bacteroidia	Chitinophagales	Saprospiraceae	uncultured			2	1	1
ASV196	Bacteria	Bacteroidetes	Bacteroidia	Chitinophagales	uncultured	Ambiguous_taxa	Ambiguous_taxa		65	14	8
ASV197	Bacteria	Bacteroidetes	Bacteroidia	Chitinophagales	uncultured	Ambiguous_taxa	Ambiguous_taxa		16	8	3
ASV198	Bacteria	Bacteroidetes	Bacteroidia	Chitinophagales	uncultured	uncultured bacterium	uncultured bacterium		28	1	0
ASV199	Bacteria	Bacteroidetes	Bacteroidia	Chitinophagales					8	0	0
ASV200	Bacteria	Bacteroidetes	Bacteroidia	Chitinophagales					4	0	0
ASV201	Bacteria	Bacteroidetes	Bacteroidia	Chitinophagales					19	0	0
ASV202	Bacteria	Bacteroidetes	Bacteroidia	Chitinophagales					52	3	1
ASV203	Bacteria	Bacteroidetes	Bacteroidia	Chitinophagales					3	0	0
ASV204	Bacteria	Bacteroidetes	Bacteroidia	Cytophagales	Amoebophilaceae	uncultured	uncultured Flexibacteraceae bacterium		2	2	0
ASV205	Bacteria	Bacteroidetes	Bacteroidia	Cytophagales	Cyclobacteriaceae	Aureibacter	Aureibacter tunicatorum		0	2	0
ASV206	Bacteria	Bacteroidetes	Bacteroidia	Cytophagales	Cyclobacteriaceae	Aureibacter	Aureibacter tunicatorum		1	2	0
ASV207	Bacteria	Bacteroidetes	Bacteroidia	Cytophagales	Cyclobacteriaceae	Fabibacter			4	0	0
ASV208	Bacteria	Bacteroidetes	Bacteroidia	Cytophagales	Cyclobacteriaceae	Fulvitalea	Fulvitalea axinellae		4	1	0
ASV209	Bacteria	Bacteroidetes	Bacteroidia	Cytophagales	Cyclobacteriaceae	Marinoscillum	Ambiguous_taxa		0	3	4
ASV210	Bacteria	Bacteroidetes	Bacteroidia	Cytophagales	Cyclobacteriaceae	Marinoscillum	marine metagenome		0	3	13
ASV211	Bacteria	Bacteroidetes	Bacteroidia	Cytophagales	Cyclobacteriaceae	Marinoscillum	uncultured marine bacterium		0	2	8
ASV212	Bacteria	Bacteroidetes	Bacteroidia	Cytophagales	Cyclobacteriaceae	Marinoscillum	uncultured marine bacterium		1	5	19
ASV213	Bacteria	Bacteroidetes	Bacteroidia	Cytophagales	Cyclobacteriaceae	Marinoscillum	uncultured marine bacterium		0	0	3
ASV214	Bacteria	Bacteroidetes	Bacteroidia	Cytophagales	Cyclobacteriaceae	Marinoscillum			2	3	7
ASV215	Bacteria	Bacteroidetes	Bacteroidia	Cytophagales	Cyclobacteriaceae	Marinoscillum			2	14	35
ASV216	Bacteria	Bacteroidetes	Bacteroidia	Cytophagales	Cyclobacteriaceae	Persicobacter	Ambiguous_taxa		3	5	0
ASV217	Bacteria	Bacteroidetes	Bacteroidia	Cytophagales	Cyclobacteriaceae	Persicobacter	Ambiguous_taxa		2	5	2
ASV218	Bacteria	Bacteroidetes	Bacteroidia	Cytophagales	Cyclobacteriaceae	uncultured	uncultured Flammeovirgaceae bacterium		3	1	0
ASV219	Bacteria	Bacteroidetes	Bacteroidia	Cytophagales	Cyclobacteriaceae	uncultured	uncultured marine bacterium		3	0	0
ASV220	Bacteria	Bacteroidetes	Bacteroidia	Cytophagales	Cyclobacteriaceae	uncultured	uncultured marine bacterium		4	0	0
ASV221	Bacteria	Bacteroidetes	Bacteroidia	Cytophagales	Cyclobacteriaceae	uncultured			4	6	2
ASV222	Bacteria	Bacteroidetes	Bacteroidia	Cytophagales	Flammeovirgaceae	Flammeovirga			4	0	0
ASV223	Bacteria	Bacteroidetes	Bacteroidia	Cytophagales	Flammeovirgaceae	Flammeovirga			19	23	6
ASV224	Bacteria	Bacteroidetes	Bacteroidia	Cytophagales	Spirosomaceae	Pseudarcicella			3	0	0
ASV225	Bacteria	Bacteroidetes	Bacteroidia	Flavobacteriales	Crocinitomicaceae	Crocinitomix	uncultured bacterium		0	1	4
ASV226	Bacteria	Bacteroidetes	Bacteroidia	Flavobacteriales	Crocinitomicaceae	Crocinitomix	uncultured Flavobacterium sp.		1	2	0
ASV227	Bacteria	Bacteroidetes	Bacteroidia	Flavobacteriales	Crocinitomicaceae	Crocinitomix	uncultured marine microorganism		1	2	0
ASV228	Bacteria	Bacteroidetes	Bacteroidia	Flavobacteriales	Crocinitomicaceae	Crocinitomix			25	1	0
ASV229	Bacteria	Bacteroidetes	Bacteroidia	Flavobacteriales	Crocinitomicaceae	Crocinitomix			0	1	1
ASV230	Bacteria	Bacteroidetes	Bacteroidia	Flavobacteriales	Crocinitomicaceae	Fluviicola	uncultured Flavobacterium sp.		36	1	1
ASV231	Bacteria	Bacteroidetes	Bacteroidia	Flavobacteriales	Crocinitomicaceae	Fluviicola			0	1	2
ASV232	Bacteria	Bacteroidetes	Bacteroidia	Flavobacteriales	Crocinitomicaceae	Fluviicola			6	0	0
ASV233	Bacteria	Bacteroidetes	Bacteroidia	Flavobacteriales	Crocinitomicaceae	Fluviicola			120	30	23
ASV234	Bacteria	Bacteroidetes	Bacteroidia	Flavobacteriales	Crocinitomicaceae	Fluviicola			2	0	0
ASV235	Bacteria	Bacteroidetes	Bacteroidia	Flavobacteriales	Crocinitomicaceae	Fluviicola			1	0	1
ASV236	Bacteria	Bacteroidetes	Bacteroidia	Flavobacteriales	Crocinitomicaceae	Fluviicola			0	0	2
ASV237	Bacteria	Bacteroidetes	Bacteroidia	Flavobacteriales	Crocinitomicaceae	Salinirepens	uncultured Bacteroidetes bacterium		1	1	0
ASV238	Bacteria	Bacteroidetes	Bacteroidia	Flavobacteriales	Crocinitomicaceae	Salinirepens			1	1	0
ASV239	Bacteria	Bacteroidetes	Bacteroidia	Flavobacteriales	Crocinitomicaceae				9	0	0
ASV240	Bacteria	Bacteroidetes	Bacteroidia	Flavobacteriales	Cryomorphaceae	NS10 marine group	Ambiguous_taxa		5	0	0
ASV241	Bacteria	Bacteroidetes	Bacteroidia	Flavobacteriales	Cryomorphaceae	NS10 marine group	Ambiguous_taxa		2	0	0
ASV242	Bacteria	Bacteroidetes	Bacteroidia	Flavobacteriales	Cryomorphaceae	NS10 marine group			0	4	1
ASV243	Bacteria	Bacteroidetes	Bacteroidia	Flavobacteriales	Cryomorphaceae	NS10 marine group			5	0	0
ASV244	Bacteria	Bacteroidetes	Bacteroidia	Flavobacteriales	Cryomorphaceae	uncultured	Ambiguous_taxa		9	0	0
ASV245	Bacteria	Bacteroidetes	Bacteroidia	Flavobacteriales	Cryomorphaceae	uncultured	Ambiguous_taxa		30	5	1
ASV246	Bacteria	Bacteroidetes	Bacteroidia	Flavobacteriales	Cryomorphaceae	uncultured	metagenome		2	0	0
ASV247	Bacteria	Bacteroidetes	Bacteroidia	Flavobacteriales	Cryomorphaceae	uncultured	metagenome		16	2	0
ASV248	Bacteria	Bacteroidetes	Bacteroidia	Flavobacteriales	Cryomorphaceae	uncultured	uncultured bacterium		0	0	2
ASV249	Bacteria	Bacteroidetes	Bacteroidia	Flavobacteriales	Cryomorphaceae	uncultured	uncultured Bacteroidetes bacterium		10	4	0
ASV250	Bacteria	Bacteroidetes	Bacteroidia	Flavobacteriales	Cryomorphaceae	uncultured	uncultured Flavobacteriales bacterium		1	1	1
ASV251	Bacteria	Bacteroidetes	Bacteroidia	Flavobacteriales	Cryomorphaceae	uncultured	uncultured Flavobacterium sp.		7	0	0
ASV252	Bacteria	Bacteroidetes	Bacteroidia	Flavobacteriales	Cryomorphaceae	uncultured	uncultured Flavobacterium sp.		9	0	0
ASV253	Bacteria	Bacteroidetes	Bacteroidia	Flavobacteriales	Cryomorphaceae	uncultured	uncultured Flavobacterium sp.		40	5	1
ASV254	Bacteria	Bacteroidetes	Bacteroidia	Flavobacteriales	Cryomorphaceae	uncultured	uncultured Flavobacterium sp.		12	3	1
ASV255	Bacteria	Bacteroidetes	Bacteroidia	Flavobacteriales	Cryomorphaceae	uncultured	uncultured marine bacterium		86	14	5
ASV256	Bacteria	Bacteroidetes	Bacteroidia	Flavobacteriales	Cryomorphaceae	uncultured	uncultured Owenweeksia sp.		24	8	19
ASV257	Bacteria	Bacteroidetes	Bacteroidia	Flavobacteriales	Cryomorphaceae	uncultured	uncultured Owenweeksia sp.		0	2	4
ASV258	Bacteria	Bacteroidetes	Bacteroidia	Flavobacteriales	Cryomorphaceae	uncultured	uncultured Owenweeksia sp.		16	6	13
ASV259	Bacteria	Bacteroidetes	Bacteroidia	Flavobacteriales	Cryomorphaceae	uncultured			3	0	0
ASV260	Bacteria	Bacteroidetes	Bacteroidia	Flavobacteriales	Cryomorphaceae	uncultured			97	40	39
ASV261	Bacteria	Bacteroidetes	Bacteroidia	Flavobacteriales	Cryomorphaceae	uncultured			55	5	2
ASV262	Bacteria	Bacteroidetes	Bacteroidia	Flavobacteriales	Cryomorphaceae	uncultured			5	1	0
ASV263	Bacteria	Bacteroidetes	Bacteroidia	Flavobacteriales	Cryomorphaceae	uncultured			2	0	0
ASV264	Bacteria	Bacteroidetes	Bacteroidia	Flavobacteriales	Cryomorphaceae	uncultured			1	1	1
ASV265	Bacteria	Bacteroidetes	Bacteroidia	Flavobacteriales	Cryomorphaceae	uncultured			0	5	0
ASV266	Bacteria	Bacteroidetes	Bacteroidia	Flavobacteriales	Cryomorphaceae	uncultured			46	5	2
ASV267	Bacteria	Bacteroidetes	Bacteroidia	Flavobacteriales	Cryomorphaceae	uncultured			93	34	12
ASV268	Bacteria	Bacteroidetes	Bacteroidia	Flavobacteriales	Flavobacteriaceae	Actibacter	uncultured bacterium		2	0	0
ASV269	Bacteria	Bacteroidetes	Bacteroidia	Flavobacteriales	Flavobacteriaceae	Actibacter			2	1	0
ASV270	Bacteria	Bacteroidetes	Bacteroidia	Flavobacteriales	Flavobacteriaceae	Actibacter			4	0	0
ASV271	Bacteria	Bacteroidetes	Bacteroidia	Flavobacteriales	Flavobacteriaceae	Algitalea	uncultured bacterium		2	4	0
ASV272	Bacteria	Bacteroidetes	Bacteroidia	Flavobacteriales	Flavobacteriaceae	Algitalea	uncultured bacterium		0	2	0
ASV273	Bacteria	Bacteroidetes	Bacteroidia	Flavobacteriales	Flavobacteriaceae	Algitalea	uncultured bacterium		0	1	1
ASV274	Bacteria	Bacteroidetes	Bacteroidia	Flavobacteriales	Flavobacteriaceae	Aquibacter	uncultured bacterium		2	0	0
ASV275	Bacteria	Bacteroidetes	Bacteroidia	Flavobacteriales	Flavobacteriaceae	Aquibacter			4	0	0
ASV276	Bacteria	Bacteroidetes	Bacteroidia	Flavobacteriales	Flavobacteriaceae	Aquibacter			3	0	0
ASV277	Bacteria	Bacteroidetes	Bacteroidia	Flavobacteriales	Flavobacteriaceae	Aureicoccus	Ambiguous_taxa		9	5	1
ASV278	Bacteria	Bacteroidetes	Bacteroidia	Flavobacteriales	Flavobacteriaceae	Aureimarina			2	1	0
ASV279	Bacteria	Bacteroidetes	Bacteroidia	Flavobacteriales	Flavobacteriaceae	Aureivirga	Aureivirga marina		1	2	0
ASV280	Bacteria	Bacteroidetes	Bacteroidia	Flavobacteriales	Flavobacteriaceae	Dokdonia	uncultured Bacteroidetes bacterium		0	2	0
ASV281	Bacteria	Bacteroidetes	Bacteroidia	Flavobacteriales	Flavobacteriaceae	Flavicella	uncultured bacterium		12	1	0
ASV282	Bacteria	Bacteroidetes	Bacteroidia	Flavobacteriales	Flavobacteriaceae	Flavobacterium			2	0	0
ASV283	Bacteria	Bacteroidetes	Bacteroidia	Flavobacteriales	Flavobacteriaceae	Formosa	uncultured marine bacterium		0	2	6
ASV284	Bacteria	Bacteroidetes	Bacteroidia	Flavobacteriales	Flavobacteriaceae	Formosa	uncultured marine bacterium		0	1	4
ASV285	Bacteria	Bacteroidetes	Bacteroidia	Flavobacteriales	Flavobacteriaceae	Formosa	uncultured marine bacterium		0	1	7
ASV286	Bacteria	Bacteroidetes	Bacteroidia	Flavobacteriales	Flavobacteriaceae	Formosa			95	25	15
ASV287	Bacteria	Bacteroidetes	Bacteroidia	Flavobacteriales	Flavobacteriaceae	Formosa			110	25	10
ASV288	Bacteria	Bacteroidetes	Bacteroidia	Flavobacteriales	Flavobacteriaceae	Formosa			17	4	1
ASV289	Bacteria	Bacteroidetes	Bacteroidia	Flavobacteriales	Flavobacteriaceae	Lutibacter	Ambiguous_taxa		7	1	0
ASV290	Bacteria	Bacteroidetes	Bacteroidia	Flavobacteriales	Flavobacteriaceae	Lutibacter			2	0	0
ASV291	Bacteria	Bacteroidetes	Bacteroidia	Flavobacteriales	Flavobacteriaceae	NS2b marine group	Ambiguous_taxa		0	8	23
ASV292	Bacteria	Bacteroidetes	Bacteroidia	Flavobacteriales	Flavobacteriaceae	NS2b marine group	uncultured marine bacterium		0	0	3
ASV293	Bacteria	Bacteroidetes	Bacteroidia	Flavobacteriales	Flavobacteriaceae	NS2b marine group	uncultured marine bacterium		0	13	34
ASV294	Bacteria	Bacteroidetes	Bacteroidia	Flavobacteriales	Flavobacteriaceae	NS2b marine group	uncultured marine bacterium		4	0	3
ASV295	Bacteria	Bacteroidetes	Bacteroidia	Flavobacteriales	Flavobacteriaceae	NS2b marine group			60	13	24
ASV296	Bacteria	Bacteroidetes	Bacteroidia	Flavobacteriales	Flavobacteriaceae	NS2b marine group			94	33	39
ASV297	Bacteria	Bacteroidetes	Bacteroidia	Flavobacteriales	Flavobacteriaceae	NS2b marine group			2	10	10
ASV298	Bacteria	Bacteroidetes	Bacteroidia	Flavobacteriales	Flavobacteriaceae	NS2b marine group			18	6	18
ASV299	Bacteria	Bacteroidetes	Bacteroidia	Flavobacteriales	Flavobacteriaceae	NS3a marine group	marine metagenome		6	1	0
ASV300	Bacteria	Bacteroidetes	Bacteroidia	Flavobacteriales	Flavobacteriaceae	NS4 marine group	Ambiguous_taxa		0	0	12
ASV301	Bacteria	Bacteroidetes	Bacteroidia	Flavobacteriales	Flavobacteriaceae	NS4 marine group	Ambiguous_taxa		0	4	11
ASV302	Bacteria	Bacteroidetes	Bacteroidia	Flavobacteriales	Flavobacteriaceae	NS4 marine group	uncultured marine bacterium		21	3	2
ASV303	Bacteria	Bacteroidetes	Bacteroidia	Flavobacteriales	Flavobacteriaceae	NS4 marine group	uncultured marine microorganism		58	8	0
ASV304	Bacteria	Bacteroidetes	Bacteroidia	Flavobacteriales	Flavobacteriaceae	NS4 marine group	uncultured marine microorganism		2	0	0
ASV305	Bacteria	Bacteroidetes	Bacteroidia	Flavobacteriales	Flavobacteriaceae	NS4 marine group	unidentified marine bacterioplankton		38	5	2
ASV306	Bacteria	Bacteroidetes	Bacteroidia	Flavobacteriales	Flavobacteriaceae	NS4 marine group			0	8	36
ASV307	Bacteria	Bacteroidetes	Bacteroidia	Flavobacteriales	Flavobacteriaceae	NS4 marine group			2	2	6
ASV308	Bacteria	Bacteroidetes	Bacteroidia	Flavobacteriales	Flavobacteriaceae	NS4 marine group			1	4	17
ASV309	Bacteria	Bacteroidetes	Bacteroidia	Flavobacteriales	Flavobacteriaceae	NS4 marine group			0	16	39
ASV310	Bacteria	Bacteroidetes	Bacteroidia	Flavobacteriales	Flavobacteriaceae	NS4 marine group			101	20	7
ASV311	Bacteria	Bacteroidetes	Bacteroidia	Flavobacteriales	Flavobacteriaceae	NS4 marine group			0	0	2
ASV312	Bacteria	Bacteroidetes	Bacteroidia	Flavobacteriales	Flavobacteriaceae	NS4 marine group			120	40	37
ASV313	Bacteria	Bacteroidetes	Bacteroidia	Flavobacteriales	Flavobacteriaceae	NS4 marine group			12	9	18
ASV314	Bacteria	Bacteroidetes	Bacteroidia	Flavobacteriales	Flavobacteriaceae	NS4 marine group			54	5	0
ASV315	Bacteria	Bacteroidetes	Bacteroidia	Flavobacteriales	Flavobacteriaceae	NS4 marine group			8	0	0
ASV316	Bacteria	Bacteroidetes	Bacteroidia	Flavobacteriales	Flavobacteriaceae	NS4 marine group			13	1	0
ASV317	Bacteria	Bacteroidetes	Bacteroidia	Flavobacteriales	Flavobacteriaceae	NS4 marine group			6	1	0
ASV318	Bacteria	Bacteroidetes	Bacteroidia	Flavobacteriales	Flavobacteriaceae	NS5 marine group	Ambiguous_taxa		0	1	3
ASV319	Bacteria	Bacteroidetes	Bacteroidia	Flavobacteriales	Flavobacteriaceae	NS5 marine group	Ambiguous_taxa		0	2	11
ASV320	Bacteria	Bacteroidetes	Bacteroidia	Flavobacteriales	Flavobacteriaceae	NS5 marine group	Ambiguous_taxa		1	0	3
ASV321	Bacteria	Bacteroidetes	Bacteroidia	Flavobacteriales	Flavobacteriaceae	NS5 marine group	Ambiguous_taxa		0	0	2
ASV322	Bacteria	Bacteroidetes	Bacteroidia	Flavobacteriales	Flavobacteriaceae	NS5 marine group	Ambiguous_taxa		0	7	17
ASV323	Bacteria	Bacteroidetes	Bacteroidia	Flavobacteriales	Flavobacteriaceae	NS5 marine group	Ambiguous_taxa		26	1	0
ASV324	Bacteria	Bacteroidetes	Bacteroidia	Flavobacteriales	Flavobacteriaceae	NS5 marine group	marine metagenome		5	0	2
ASV325	Bacteria	Bacteroidetes	Bacteroidia	Flavobacteriales	Flavobacteriaceae	NS5 marine group	metagenome		1	4	6
ASV326	Bacteria	Bacteroidetes	Bacteroidia	Flavobacteriales	Flavobacteriaceae	NS5 marine group	uncultured bacterium		0	0	2
ASV327	Bacteria	Bacteroidetes	Bacteroidia	Flavobacteriales	Flavobacteriaceae	NS5 marine group	uncultured Flavobacteriaceae bacterium		103	37	31
ASV328	Bacteria	Bacteroidetes	Bacteroidia	Flavobacteriales	Flavobacteriaceae	NS5 marine group	uncultured Flavobacteriaceae bacterium		4	7	1
ASV329	Bacteria	Bacteroidetes	Bacteroidia	Flavobacteriales	Flavobacteriaceae	NS5 marine group	uncultured Flavobacteriaceae bacterium		30	39	29
ASV330	Bacteria	Bacteroidetes	Bacteroidia	Flavobacteriales	Flavobacteriaceae	NS5 marine group	uncultured Flavobacteriaceae bacterium		111	38	28
ASV331	Bacteria	Bacteroidetes	Bacteroidia	Flavobacteriales	Flavobacteriaceae	NS5 marine group	uncultured Flavobacteriaceae bacterium		1	1	0
ASV332	Bacteria	Bacteroidetes	Bacteroidia	Flavobacteriales	Flavobacteriaceae	NS5 marine group	uncultured Flavobacteriaceae bacterium		103	40	36
ASV333	Bacteria	Bacteroidetes	Bacteroidia	Flavobacteriales	Flavobacteriaceae	NS5 marine group	uncultured Flavobacteriaceae bacterium		112	40	37
ASV334	Bacteria	Bacteroidetes	Bacteroidia	Flavobacteriales	Flavobacteriaceae	NS5 marine group	uncultured Flavobacteriaceae bacterium		114	40	34
ASV335	Bacteria	Bacteroidetes	Bacteroidia	Flavobacteriales	Flavobacteriaceae	NS5 marine group	uncultured Flavobacteriaceae bacterium		1	7	0
ASV336	Bacteria	Bacteroidetes	Bacteroidia	Flavobacteriales	Flavobacteriaceae	NS5 marine group	uncultured Flavobacteriaceae bacterium		0	2	0
ASV337	Bacteria	Bacteroidetes	Bacteroidia	Flavobacteriales	Flavobacteriaceae	NS5 marine group	uncultured Flavobacteriaceae bacterium		7	4	1
ASV338	Bacteria	Bacteroidetes	Bacteroidia	Flavobacteriales	Flavobacteriaceae	NS5 marine group	uncultured Flavobacteriaceae bacterium		32	36	20
ASV339	Bacteria	Bacteroidetes	Bacteroidia	Flavobacteriales	Flavobacteriaceae	NS5 marine group	uncultured Flavobacteriaceae bacterium		22	20	13
ASV340	Bacteria	Bacteroidetes	Bacteroidia	Flavobacteriales	Flavobacteriaceae	NS5 marine group	uncultured Flavobacteriaceae bacterium		104	38	33
ASV341	Bacteria	Bacteroidetes	Bacteroidia	Flavobacteriales	Flavobacteriaceae	NS5 marine group	uncultured Flavobacteriaceae bacterium		86	35	27
ASV342	Bacteria	Bacteroidetes	Bacteroidia	Flavobacteriales	Flavobacteriaceae	NS5 marine group	uncultured Flavobacterium sp.		54	15	5
ASV343	Bacteria	Bacteroidetes	Bacteroidia	Flavobacteriales	Flavobacteriaceae	NS5 marine group			0	0	2
ASV344	Bacteria	Bacteroidetes	Bacteroidia	Flavobacteriales	Flavobacteriaceae	NS5 marine group			0	3	5
ASV345	Bacteria	Bacteroidetes	Bacteroidia	Flavobacteriales	Flavobacteriaceae	NS5 marine group			8	1	0
ASV346	Bacteria	Bacteroidetes	Bacteroidia	Flavobacteriales	Flavobacteriaceae	NS5 marine group			1	3	10
ASV347	Bacteria	Bacteroidetes	Bacteroidia	Flavobacteriales	Flavobacteriaceae	NS5 marine group			117	38	40
ASV348	Bacteria	Bacteroidetes	Bacteroidia	Flavobacteriales	Flavobacteriaceae	NS5 marine group			0	4	4
ASV349	Bacteria	Bacteroidetes	Bacteroidia	Flavobacteriales	Flavobacteriaceae	NS5 marine group			0	0	2
ASV350	Bacteria	Bacteroidetes	Bacteroidia	Flavobacteriales	Flavobacteriaceae	NS5 marine group			0	0	2
ASV351	Bacteria	Bacteroidetes	Bacteroidia	Flavobacteriales	Flavobacteriaceae	NS5 marine group			23	4	0
ASV352	Bacteria	Bacteroidetes	Bacteroidia	Flavobacteriales	Flavobacteriaceae	NS5 marine group			2	15	29
ASV353	Bacteria	Bacteroidetes	Bacteroidia	Flavobacteriales	Flavobacteriaceae	NS5 marine group			0	2	1
ASV354	Bacteria	Bacteroidetes	Bacteroidia	Flavobacteriales	Flavobacteriaceae	NS5 marine group			0	1	1
ASV355	Bacteria	Bacteroidetes	Bacteroidia	Flavobacteriales	Flavobacteriaceae	NS5 marine group			0	3	27
ASV356	Bacteria	Bacteroidetes	Bacteroidia	Flavobacteriales	Flavobacteriaceae	NS5 marine group			15	0	0
ASV357	Bacteria	Bacteroidetes	Bacteroidia	Flavobacteriales	Flavobacteriaceae	NS5 marine group			1	0	2
ASV358	Bacteria	Bacteroidetes	Bacteroidia	Flavobacteriales	Flavobacteriaceae	NS5 marine group			0	0	2
ASV359	Bacteria	Bacteroidetes	Bacteroidia	Flavobacteriales	Flavobacteriaceae	NS5 marine group			26	0	1
ASV360	Bacteria	Bacteroidetes	Bacteroidia	Flavobacteriales	Flavobacteriaceae	NS5 marine group			3	0	0
ASV361	Bacteria	Bacteroidetes	Bacteroidia	Flavobacteriales	Flavobacteriaceae	NS5 marine group			0	0	4
ASV362	Bacteria	Bacteroidetes	Bacteroidia	Flavobacteriales	Flavobacteriaceae	NS5 marine group			72	14	6
ASV363	Bacteria	Bacteroidetes	Bacteroidia	Flavobacteriales	Flavobacteriaceae	NS5 marine group			0	3	18
ASV364	Bacteria	Bacteroidetes	Bacteroidia	Flavobacteriales	Flavobacteriaceae	NS5 marine group			51	7	1
ASV365	Bacteria	Bacteroidetes	Bacteroidia	Flavobacteriales	Flavobacteriaceae	NS5 marine group			2	2	0
ASV366	Bacteria	Bacteroidetes	Bacteroidia	Flavobacteriales	Flavobacteriaceae	NS5 marine group			14	1	0
ASV367	Bacteria	Bacteroidetes	Bacteroidia	Flavobacteriales	Flavobacteriaceae	Polaribacter 4			1	0	3
ASV368	Bacteria	Bacteroidetes	Bacteroidia	Flavobacteriales	Flavobacteriaceae	Pseudofulvibacter	uncultured bacterium		1	0	1
ASV369	Bacteria	Bacteroidetes	Bacteroidia	Flavobacteriales	Flavobacteriaceae	Psychroflexus			0	2	0
ASV370	Bacteria	Bacteroidetes	Bacteroidia	Flavobacteriales	Flavobacteriaceae	Seonamhaeicola	uncultured bacterium		2	0	0
ASV371	Bacteria	Bacteroidetes	Bacteroidia	Flavobacteriales	Flavobacteriaceae	Seonamhaeicola			1	1	0
ASV372	Bacteria	Bacteroidetes	Bacteroidia	Flavobacteriales	Flavobacteriaceae	Tenacibaculum	Ambiguous_taxa		1	1	0
ASV373	Bacteria	Bacteroidetes	Bacteroidia	Flavobacteriales	Flavobacteriaceae	Tenacibaculum	Ambiguous_taxa		1	0	1
ASV374	Bacteria	Bacteroidetes	Bacteroidia	Flavobacteriales	Flavobacteriaceae	Tenacibaculum			2	0	0
ASV375	Bacteria	Bacteroidetes	Bacteroidia	Flavobacteriales	Flavobacteriaceae	Tenacibaculum			1	2	0
ASV376	Bacteria	Bacteroidetes	Bacteroidia	Flavobacteriales	Flavobacteriaceae	Tenacibaculum			1	1	7
ASV377	Bacteria	Bacteroidetes	Bacteroidia	Flavobacteriales	Flavobacteriaceae	Tenacibaculum			0	0	2
ASV378	Bacteria	Bacteroidetes	Bacteroidia	Flavobacteriales	Flavobacteriaceae	uncultured	Ambiguous_taxa		107	27	12
ASV379	Bacteria	Bacteroidetes	Bacteroidia	Flavobacteriales	Flavobacteriaceae	uncultured	Ambiguous_taxa		13	1	0
ASV380	Bacteria	Bacteroidetes	Bacteroidia	Flavobacteriales	Flavobacteriaceae	uncultured	Flavobacteriaceae bacterium A100		1	2	0
ASV381	Bacteria	Bacteroidetes	Bacteroidia	Flavobacteriales	Flavobacteriaceae	uncultured	Flavobacteriaceae bacterium LE20		89	15	10
ASV382	Bacteria	Bacteroidetes	Bacteroidia	Flavobacteriales	Flavobacteriaceae	uncultured	uncultured Bacteroidetes bacterium		114	26	11
ASV383	Bacteria	Bacteroidetes	Bacteroidia	Flavobacteriales	Flavobacteriaceae	uncultured			21	3	0
ASV384	Bacteria	Bacteroidetes	Bacteroidia	Flavobacteriales	Flavobacteriaceae	uncultured			3	0	1
ASV385	Bacteria	Bacteroidetes	Bacteroidia	Flavobacteriales	Flavobacteriaceae	uncultured			3	2	1
ASV386	Bacteria	Bacteroidetes	Bacteroidia	Flavobacteriales	Flavobacteriaceae	Winogradskyella			2	0	0
ASV387	Bacteria	Bacteroidetes	Bacteroidia	Flavobacteriales	Flavobacteriaceae	Winogradskyella			12	3	0
ASV388	Bacteria	Bacteroidetes	Bacteroidia	Flavobacteriales	Flavobacteriaceae	Winogradskyella			2	0	0
ASV389	Bacteria	Bacteroidetes	Bacteroidia	Flavobacteriales	Flavobacteriaceae	Winogradskyella			2	1	1
ASV390	Bacteria	Bacteroidetes	Bacteroidia	Flavobacteriales	Flavobacteriaceae	Winogradskyella			0	2	0
ASV391	Bacteria	Bacteroidetes	Bacteroidia	Flavobacteriales	Flavobacteriaceae	Zeaxanthinibacter	uncultured bacterium		3	0	0
ASV392	Bacteria	Bacteroidetes	Bacteroidia	Flavobacteriales	Flavobacteriaceae				3	0	0
ASV393	Bacteria	Bacteroidetes	Bacteroidia	Flavobacteriales	Flavobacteriaceae				0	2	0
ASV394	Bacteria	Bacteroidetes	Bacteroidia	Flavobacteriales	Flavobacteriaceae				0	1	2
ASV395	Bacteria	Bacteroidetes	Bacteroidia	Flavobacteriales	Flavobacteriaceae				0	1	1
ASV396	Bacteria	Bacteroidetes	Bacteroidia	Flavobacteriales	Flavobacteriaceae				2	0	0
ASV397	Bacteria	Bacteroidetes	Bacteroidia	Flavobacteriales	Flavobacteriaceae				1	2	0
ASV398	Bacteria	Bacteroidetes	Bacteroidia	Flavobacteriales	Flavobacteriaceae				2	0	0
ASV399	Bacteria	Bacteroidetes	Bacteroidia	Flavobacteriales	Flavobacteriaceae				0	1	3
ASV400	Bacteria	Bacteroidetes	Bacteroidia	Flavobacteriales	Flavobacteriaceae				7	2	0
ASV401	Bacteria	Bacteroidetes	Bacteroidia	Flavobacteriales	Flavobacteriaceae				0	1	2
ASV402	Bacteria	Bacteroidetes	Bacteroidia	Flavobacteriales	Flavobacteriaceae				3	0	0
ASV403	Bacteria	Bacteroidetes	Bacteroidia	Flavobacteriales	Flavobacteriaceae				1	0	1
ASV404	Bacteria	Bacteroidetes	Bacteroidia	Flavobacteriales	Flavobacteriaceae				2	0	0
ASV405	Bacteria	Bacteroidetes	Bacteroidia	Flavobacteriales	Flavobacteriaceae				2	0	0
ASV406	Bacteria	Bacteroidetes	Bacteroidia	Flavobacteriales	NS7 marine group	Ambiguous_taxa	Ambiguous_taxa		5	2	0
ASV407	Bacteria	Bacteroidetes	Bacteroidia	Flavobacteriales	NS7 marine group	Ambiguous_taxa	Ambiguous_taxa		39	2	0
ASV408	Bacteria	Bacteroidetes	Bacteroidia	Flavobacteriales	NS7 marine group	Ambiguous_taxa	Ambiguous_taxa		0	2	11
ASV409	Bacteria	Bacteroidetes	Bacteroidia	Flavobacteriales	NS7 marine group	uncultured marine bacterium	uncultured marine bacterium		0	1	2
ASV410	Bacteria	Bacteroidetes	Bacteroidia	Flavobacteriales	NS7 marine group				0	2	4
ASV411	Bacteria	Bacteroidetes	Bacteroidia	Flavobacteriales	NS7 marine group				1	2	7
ASV412	Bacteria	Bacteroidetes	Bacteroidia	Flavobacteriales	NS7 marine group				91	31	38
ASV413	Bacteria	Bacteroidetes	Bacteroidia	Flavobacteriales	NS7 marine group				3	0	1
ASV414	Bacteria	Bacteroidetes	Bacteroidia	Flavobacteriales	NS9 marine group	Ambiguous_taxa	Ambiguous_taxa		119	38	36
ASV415	Bacteria	Bacteroidetes	Bacteroidia	Flavobacteriales	NS9 marine group	Ambiguous_taxa	Ambiguous_taxa		0	1	1
ASV416	Bacteria	Bacteroidetes	Bacteroidia	Flavobacteriales	NS9 marine group	Ambiguous_taxa	Ambiguous_taxa		106	40	33
ASV417	Bacteria	Bacteroidetes	Bacteroidia	Flavobacteriales	NS9 marine group	Ambiguous_taxa	Ambiguous_taxa		42	38	35
ASV418	Bacteria	Bacteroidetes	Bacteroidia	Flavobacteriales	NS9 marine group	Ambiguous_taxa	Ambiguous_taxa		2	0	1
ASV419	Bacteria	Bacteroidetes	Bacteroidia	Flavobacteriales	NS9 marine group	Ambiguous_taxa	Ambiguous_taxa		3	3	2
ASV420	Bacteria	Bacteroidetes	Bacteroidia	Flavobacteriales	NS9 marine group	Ambiguous_taxa	Ambiguous_taxa		21	1	1
ASV421	Bacteria	Bacteroidetes	Bacteroidia	Flavobacteriales	NS9 marine group	Ambiguous_taxa	Ambiguous_taxa		9	26	11
ASV422	Bacteria	Bacteroidetes	Bacteroidia	Flavobacteriales	NS9 marine group	Ambiguous_taxa	Ambiguous_taxa		2	10	1
ASV423	Bacteria	Bacteroidetes	Bacteroidia	Flavobacteriales	NS9 marine group	Ambiguous_taxa	Ambiguous_taxa		0	2	0
ASV424	Bacteria	Bacteroidetes	Bacteroidia	Flavobacteriales	NS9 marine group	hydrothermal vent metagenome	hydrothermal vent metagenome		0	0	2
ASV425	Bacteria	Bacteroidetes	Bacteroidia	Flavobacteriales	NS9 marine group	hydrothermal vent metagenome	hydrothermal vent metagenome		1	0	5
ASV426	Bacteria	Bacteroidetes	Bacteroidia	Flavobacteriales	NS9 marine group	hydrothermal vent metagenome	hydrothermal vent metagenome		0	1	1
ASV427	Bacteria	Bacteroidetes	Bacteroidia	Flavobacteriales	NS9 marine group	hydrothermal vent metagenome	hydrothermal vent metagenome		1	0	8
ASV428	Bacteria	Bacteroidetes	Bacteroidia	Flavobacteriales	NS9 marine group	uncultured bacterium	uncultured bacterium		22	15	13
ASV429	Bacteria	Bacteroidetes	Bacteroidia	Flavobacteriales	NS9 marine group	uncultured Flavobacteriales bacterium	uncultured Flavobacteriales bacterium		20	1	10
ASV430	Bacteria	Bacteroidetes	Bacteroidia	Flavobacteriales	NS9 marine group	uncultured Flavobacteriales bacterium	uncultured Flavobacteriales bacterium		34	31	19
ASV431	Bacteria	Bacteroidetes	Bacteroidia	Flavobacteriales	NS9 marine group	uncultured Flavobacteriales bacterium	uncultured Flavobacteriales bacterium		73	32	17
ASV432	Bacteria	Bacteroidetes	Bacteroidia	Flavobacteriales	NS9 marine group	uncultured Flavobacteriales bacterium	uncultured Flavobacteriales bacterium		2	0	0
ASV433	Bacteria	Bacteroidetes	Bacteroidia	Flavobacteriales	NS9 marine group	uncultured Flavobacteriia bacterium	uncultured Flavobacteriia bacterium		5	0	0
ASV434	Bacteria	Bacteroidetes	Bacteroidia	Flavobacteriales	NS9 marine group	uncultured Flavobacteriia bacterium	uncultured Flavobacteriia bacterium		1	2	8
ASV435	Bacteria	Bacteroidetes	Bacteroidia	Flavobacteriales	NS9 marine group	uncultured Flavobacteriia bacterium	uncultured Flavobacteriia bacterium		62	5	9
ASV436	Bacteria	Bacteroidetes	Bacteroidia	Flavobacteriales	NS9 marine group	uncultured Flavobacteriia bacterium	uncultured Flavobacteriia bacterium		1	5	28
ASV437	Bacteria	Bacteroidetes	Bacteroidia	Flavobacteriales	NS9 marine group	uncultured Flavobacteriia bacterium	uncultured Flavobacteriia bacterium		1	1	0
ASV438	Bacteria	Bacteroidetes	Bacteroidia	Flavobacteriales	NS9 marine group	uncultured Flavobacteriia bacterium	uncultured Flavobacteriia bacterium		0	1	1
ASV439	Bacteria	Bacteroidetes	Bacteroidia	Flavobacteriales	NS9 marine group	uncultured marine bacterium	uncultured marine bacterium		0	7	19
ASV440	Bacteria	Bacteroidetes	Bacteroidia	Flavobacteriales	NS9 marine group	uncultured marine bacterium	uncultured marine bacterium		0	2	11
ASV441	Bacteria	Bacteroidetes	Bacteroidia	Flavobacteriales	NS9 marine group	uncultured marine bacterium	uncultured marine bacterium		3	6	7
ASV442	Bacteria	Bacteroidetes	Bacteroidia	Flavobacteriales	NS9 marine group	uncultured marine bacterium	uncultured marine bacterium		0	2	2
ASV443	Bacteria	Bacteroidetes	Bacteroidia	Flavobacteriales	NS9 marine group	uncultured marine bacterium	uncultured marine bacterium		0	0	2
ASV444	Bacteria	Bacteroidetes	Bacteroidia	Flavobacteriales	NS9 marine group				6	0	0
ASV445	Bacteria	Bacteroidetes	Bacteroidia	Flavobacteriales	NS9 marine group				0	1	4
ASV446	Bacteria	Bacteroidetes	Bacteroidia	Flavobacteriales	NS9 marine group				6	1	0
ASV447	Bacteria	Bacteroidetes	Bacteroidia	Flavobacteriales	NS9 marine group				18	2	1
ASV448	Bacteria	Bacteroidetes	Bacteroidia	Flavobacteriales	NS9 marine group				0	2	5
ASV449	Bacteria	Bacteroidetes	Bacteroidia	Flavobacteriales	NS9 marine group				1	1	0
ASV450	Bacteria	Bacteroidetes	Bacteroidia	Flavobacteriales	NS9 marine group				2	1	1
ASV451	Bacteria	Bacteroidetes	Bacteroidia	Flavobacteriales	NS9 marine group				80	13	13
ASV452	Bacteria	Bacteroidetes	Bacteroidia	Flavobacteriales	NS9 marine group				2	0	0
ASV453	Bacteria	Bacteroidetes	Bacteroidia	Flavobacteriales	NS9 marine group				1	1	2
ASV454	Bacteria	Bacteroidetes	Bacteroidia	Flavobacteriales	NS9 marine group				0	1	13
ASV455	Bacteria	Bacteroidetes	Bacteroidia	Flavobacteriales	NS9 marine group				1	2	1
ASV456	Bacteria	Bacteroidetes	Bacteroidia	Flavobacteriales	NS9 marine group				2	2	0
ASV457	Bacteria	Bacteroidetes	Bacteroidia	Flavobacteriales	NS9 marine group				0	1	5
ASV458	Bacteria	Bacteroidetes	Bacteroidia	Flavobacteriales	NS9 marine group				8	11	10
ASV459	Bacteria	Bacteroidetes	Bacteroidia	Flavobacteriales	NS9 marine group				7	1	0
ASV460	Bacteria	Bacteroidetes	Bacteroidia	Flavobacteriales	NS9 marine group				0	1	2
ASV461	Bacteria	Bacteroidetes	Bacteroidia	Flavobacteriales	NS9 marine group				34	35	25
ASV462	Bacteria	Bacteroidetes	Bacteroidia	Sphingobacteriales	NS11-12 marine group	Ambiguous_taxa	Ambiguous_taxa		4	0	0
ASV463	Bacteria	Bacteroidetes	Bacteroidia	Sphingobacteriales	NS11-12 marine group	Ambiguous_taxa	Ambiguous_taxa		75	18	8
ASV464	Bacteria	Bacteroidetes	Bacteroidia	Sphingobacteriales	NS11-12 marine group	uncultured bacterium	uncultured bacterium		43	5	4
ASV465	Bacteria	Bacteroidetes	Bacteroidia	Sphingobacteriales	NS11-12 marine group	uncultured Bacteroidetes bacterium	uncultured Bacteroidetes bacterium		4	0	0
ASV466	Bacteria	Bacteroidetes	Bacteroidia	Sphingobacteriales	NS11-12 marine group	uncultured marine bacterium	uncultured marine bacterium		4	1	0
ASV467	Bacteria	Bacteroidetes	Bacteroidia	Sphingobacteriales	NS11-12 marine group	unidentified marine bacterioplankton	unidentified marine bacterioplankton		52	11	3
ASV468	Bacteria	Bacteroidetes	Bacteroidia	Sphingobacteriales	NS11-12 marine group	unidentified marine bacterioplankton	unidentified marine bacterioplankton		5	0	0
ASV469	Bacteria	Bacteroidetes	Bacteroidia	Sphingobacteriales	NS11-12 marine group	unidentified marine bacterioplankton	unidentified marine bacterioplankton		4	0	0
ASV470	Bacteria	Bacteroidetes	Bacteroidia	Sphingobacteriales	NS11-12 marine group	unidentified marine bacterioplankton	unidentified marine bacterioplankton		31	4	0
ASV471	Bacteria	Bacteroidetes	Bacteroidia	Sphingobacteriales	NS11-12 marine group				0	1	1
ASV472	Bacteria	Bacteroidetes	Bacteroidia						2	2	0
ASV473	Bacteria	Bacteroidetes	Bacteroidia						4	0	0
ASV474	Bacteria	Bacteroidetes	Rhodothermia	Balneolales	Balneolaceae	Balneola	uncultured bacterium		2	0	0
ASV475	Bacteria	Bacteroidetes	Rhodothermia	Balneolales	Balneolaceae	Balneola	uncultured bacterium		101	20	8
ASV476	Bacteria	Bacteroidetes	Rhodothermia	Balneolales	Balneolaceae	Balneola	uncultured Chitinophagaceae bacterium		12	1	0
ASV477	Bacteria	Bacteroidetes	Rhodothermia	Rhodothermales	Rhodothermaceae	uncultured	uncultured bacterium		4	0	0
ASV478	Bacteria	Bacteroidetes	Rhodothermia	Rhodothermales	Rhodothermaceae	uncultured			3	0	0
ASV479	Bacteria	Chlamydiae	Chlamydiae	Chlamydiales	Chlamydiaceae	uncultured	Ambiguous_taxa		3	1	0
ASV480	Bacteria	Chlamydiae	Chlamydiae	Chlamydiales	Chlamydiaceae	uncultured	metagenome		5	1	1
ASV481	Bacteria	Chlamydiae	Chlamydiae	Chlamydiales	Chlamydiaceae	uncultured	metagenome		3	0	0
ASV482	Bacteria	Chlamydiae	Chlamydiae	Chlamydiales	Chlamydiaceae	uncultured	metagenome		6	1	0
ASV483	Bacteria	Chlamydiae	Chlamydiae	Chlamydiales	Simkaniaceae	uncultured	Ambiguous_taxa		6	0	0
ASV484	Bacteria	Chlamydiae	Chlamydiae	Chlamydiales	Simkaniaceae	uncultured			10	0	0
ASV485	Bacteria	Chlamydiae	Chlamydiae	Chlamydiales	Simkaniaceae	uncultured			3	0	0
ASV486	Bacteria	Chlamydiae	Chlamydiae	Chlamydiales					6	2	0
ASV487	Bacteria	Chloroflexi	Anaerolineae	Anaerolineales	Anaerolineaceae	uncultured	uncultured Anaerolineaceae bacterium		2	0	0
ASV488	Bacteria	Chloroflexi	Anaerolineae	Anaerolineales	Anaerolineaceae	uncultured			1	1	0
ASV489	Bacteria	Chloroflexi	Dehalococcoidia	SAR202 clade	Ambiguous_taxa	Ambiguous_taxa	Ambiguous_taxa		1	2	5
ASV490	Bacteria	Chloroflexi	Dehalococcoidia	SAR202 clade	marine metagenome	marine metagenome	marine metagenome		1	0	2
ASV491	Bacteria	Chloroflexi	Dehalococcoidia	SAR202 clade	metagenome	metagenome	metagenome		0	0	3
ASV492	Bacteria	Chloroflexi	Dehalococcoidia	SAR202 clade	metagenome	metagenome	metagenome		1	4	17
ASV493	Bacteria	Chloroflexi	Dehalococcoidia	SAR202 clade	metagenome	metagenome	metagenome		0	1	2
ASV494	Bacteria	Chloroflexi	Dehalococcoidia	SAR202 clade	metagenome	metagenome	metagenome		11	1	0
ASV495	Bacteria	Chloroflexi	Dehalococcoidia	SAR202 clade					0	0	7
ASV496	Bacteria	Cyanobacteria	Oxyphotobacteria	Chloroplast	Ambiguous_taxa	Ambiguous_taxa	Ambiguous_taxa		3	0	0
ASV497	Bacteria	Cyanobacteria	Oxyphotobacteria	Chloroplast	Ambiguous_taxa	Ambiguous_taxa	Ambiguous_taxa		2	0	2
ASV498	Bacteria	Cyanobacteria	Oxyphotobacteria	Chloroplast	bacterium WHC4-2	bacterium WHC4-2	bacterium WHC4-2		1	1	2
ASV499	Bacteria	Cyanobacteria	Oxyphotobacteria	Chloroplast	bacterium WHC4-2	bacterium WHC4-2	bacterium WHC4-2		12	5	7
ASV500	Bacteria	Cyanobacteria	Oxyphotobacteria	Chloroplast	bacterium WHC4-2	bacterium WHC4-2	bacterium WHC4-2		118	34	30
ASV501	Bacteria	Cyanobacteria	Oxyphotobacteria	Chloroplast	bacterium WHC4-2	bacterium WHC4-2	bacterium WHC4-2		1	2	0
ASV502	Bacteria	Cyanobacteria	Oxyphotobacteria	Chloroplast	bacterium WHC4-2	bacterium WHC4-2	bacterium WHC4-2		13	0	0
ASV503	Bacteria	Cyanobacteria	Oxyphotobacteria	Chloroplast	bacterium WHC4-2	bacterium WHC4-2	bacterium WHC4-2		11	19	9
ASV504	Bacteria	Cyanobacteria	Oxyphotobacteria	Chloroplast	bacterium WHC4-2	bacterium WHC4-2	bacterium WHC4-2		6	0	0
ASV505	Bacteria	Cyanobacteria	Oxyphotobacteria	Chloroplast	bacterium WHC4-2	bacterium WHC4-2	bacterium WHC4-2		74	31	16
ASV506	Bacteria	Cyanobacteria	Oxyphotobacteria	Chloroplast	bacterium WHC4-2	bacterium WHC4-2	bacterium WHC4-2		58	32	36
ASV507	Bacteria	Cyanobacteria	Oxyphotobacteria	Chloroplast	bacterium WHC4-2	bacterium WHC4-2	bacterium WHC4-2		75	35	24
ASV508	Bacteria	Cyanobacteria	Oxyphotobacteria	Chloroplast	bacterium WHC4-8	bacterium WHC4-8	bacterium WHC4-8		43	9	8
ASV509	Bacteria	Cyanobacteria	Oxyphotobacteria	Chloroplast	Bathycoccus prasinos	Bathycoccus prasinos	Bathycoccus prasinos		116	22	10
ASV510	Bacteria	Cyanobacteria	Oxyphotobacteria	Chloroplast	Bathycoccus prasinos	Bathycoccus prasinos	Bathycoccus prasinos		0	1	7
ASV511	Bacteria	Cyanobacteria	Oxyphotobacteria	Chloroplast	Chrysochromulina sp. MBIC10513	Chrysochromulina sp. MBIC10513	Chrysochromulina sp. MBIC10513		33	20	7
ASV512	Bacteria	Cyanobacteria	Oxyphotobacteria	Chloroplast	Corethron pennatum	Corethron pennatum	Corethron pennatum		2	1	0
ASV513	Bacteria	Cyanobacteria	Oxyphotobacteria	Chloroplast	Crustomastix stigmatica	Crustomastix stigmatica	Crustomastix stigmatica		46	6	5
ASV514	Bacteria	Cyanobacteria	Oxyphotobacteria	Chloroplast	Cylindrotheca closterium	Cylindrotheca closterium	Cylindrotheca closterium		1	3	0
ASV515	Bacteria	Cyanobacteria	Oxyphotobacteria	Chloroplast	Cylindrotheca closterium	Cylindrotheca closterium	Cylindrotheca closterium		12	5	3
ASV516	Bacteria	Cyanobacteria	Oxyphotobacteria	Chloroplast	Cylindrotheca closterium	Cylindrotheca closterium	Cylindrotheca closterium		2	0	0
ASV517	Bacteria	Cyanobacteria	Oxyphotobacteria	Chloroplast	Cylindrotheca closterium	Cylindrotheca closterium	Cylindrotheca closterium		1	1	0
ASV518	Bacteria	Cyanobacteria	Oxyphotobacteria	Chloroplast	Cylindrotheca closterium	Cylindrotheca closterium	Cylindrotheca closterium		8	1	0
ASV519	Bacteria	Cyanobacteria	Oxyphotobacteria	Chloroplast	Cymbomonas tetramitiformis	Cymbomonas tetramitiformis	Cymbomonas tetramitiformis		73	21	12
ASV520	Bacteria	Cyanobacteria	Oxyphotobacteria	Chloroplast	Cymbomonas tetramitiformis	Cymbomonas tetramitiformis	Cymbomonas tetramitiformis		11	0	0
ASV521	Bacteria	Cyanobacteria	Oxyphotobacteria	Chloroplast	Dolichomastix tenuilepis	Dolichomastix tenuilepis	Dolichomastix tenuilepis		1	1	2
ASV522	Bacteria	Cyanobacteria	Oxyphotobacteria	Chloroplast	Dolichomastix tenuilepis	Dolichomastix tenuilepis	Dolichomastix tenuilepis		3	0	1
ASV523	Bacteria	Cyanobacteria	Oxyphotobacteria	Chloroplast	Dolichomastix tenuilepis	Dolichomastix tenuilepis	Dolichomastix tenuilepis		0	1	3
ASV524	Bacteria	Cyanobacteria	Oxyphotobacteria	Chloroplast	Dolichomastix tenuilepis	Dolichomastix tenuilepis	Dolichomastix tenuilepis		1	1	0
ASV525	Bacteria	Cyanobacteria	Oxyphotobacteria	Chloroplast	Edaphochlorella mirabilis	Edaphochlorella mirabilis	Edaphochlorella mirabilis		3	0	0
ASV526	Bacteria	Cyanobacteria	Oxyphotobacteria	Chloroplast	environmental clone OCS31	environmental clone OCS31	environmental clone OCS31		0	1	1
ASV527	Bacteria	Cyanobacteria	Oxyphotobacteria	Chloroplast	Epipyxis sp. PR26KG	Epipyxis sp. PR26KG	Epipyxis sp. PR26KG		7	0	0
ASV528	Bacteria	Cyanobacteria	Oxyphotobacteria	Chloroplast	Epipyxis sp. PR26KG	Epipyxis sp. PR26KG	Epipyxis sp. PR26KG		10	0	2
ASV529	Bacteria	Cyanobacteria	Oxyphotobacteria	Chloroplast	Epipyxis sp. PR26KG	Epipyxis sp. PR26KG	Epipyxis sp. PR26KG		5	1	0
ASV530	Bacteria	Cyanobacteria	Oxyphotobacteria	Chloroplast	Eutreptiella pomquetensis	Eutreptiella pomquetensis	Eutreptiella pomquetensis		29	19	11
ASV531	Bacteria	Cyanobacteria	Oxyphotobacteria	Chloroplast	Eutreptiella pomquetensis	Eutreptiella pomquetensis	Eutreptiella pomquetensis		10	5	1
ASV532	Bacteria	Cyanobacteria	Oxyphotobacteria	Chloroplast	Eutreptiella pomquetensis	Eutreptiella pomquetensis	Eutreptiella pomquetensis		7	0	0
ASV533	Bacteria	Cyanobacteria	Oxyphotobacteria	Chloroplast	Georgiella confluens	Georgiella confluens	Georgiella confluens		3	0	0
ASV534	Bacteria	Cyanobacteria	Oxyphotobacteria	Chloroplast	Guillardia theta	Guillardia theta	Guillardia theta		4	2	0
ASV535	Bacteria	Cyanobacteria	Oxyphotobacteria	Chloroplast	Guillardia theta	Guillardia theta	Guillardia theta		70	29	15
ASV536	Bacteria	Cyanobacteria	Oxyphotobacteria	Chloroplast	Guillardia theta	Guillardia theta	Guillardia theta		24	13	5
ASV537	Bacteria	Cyanobacteria	Oxyphotobacteria	Chloroplast	Guillardia theta	Guillardia theta	Guillardia theta		1	1	0
ASV538	Bacteria	Cyanobacteria	Oxyphotobacteria	Chloroplast	Gymnochlora stellata	Gymnochlora stellata	Gymnochlora stellata		2	4	2
ASV539	Bacteria	Cyanobacteria	Oxyphotobacteria	Chloroplast	Gymnochlora stellata	Gymnochlora stellata	Gymnochlora stellata		24	2	0
ASV540	Bacteria	Cyanobacteria	Oxyphotobacteria	Chloroplast	Gymnochlora stellata	Gymnochlora stellata	Gymnochlora stellata		0	1	1
ASV541	Bacteria	Cyanobacteria	Oxyphotobacteria	Chloroplast	Gymnochlora stellata	Gymnochlora stellata	Gymnochlora stellata		3	7	4
ASV542	Bacteria	Cyanobacteria	Oxyphotobacteria	Chloroplast	Gymnochlora stellata	Gymnochlora stellata	Gymnochlora stellata		35	6	7
ASV543	Bacteria	Cyanobacteria	Oxyphotobacteria	Chloroplast	Hemiselmis virescens	Hemiselmis virescens	Hemiselmis virescens		13	0	0
ASV544	Bacteria	Cyanobacteria	Oxyphotobacteria	Chloroplast	marine metagenome	marine metagenome	marine metagenome		18	1	0
ASV545	Bacteria	Cyanobacteria	Oxyphotobacteria	Chloroplast	marine metagenome	marine metagenome	marine metagenome		2	0	1
ASV546	Bacteria	Cyanobacteria	Oxyphotobacteria	Chloroplast	marine metagenome	marine metagenome	marine metagenome		5	1	3
ASV547	Bacteria	Cyanobacteria	Oxyphotobacteria	Chloroplast	marine metagenome	marine metagenome	marine metagenome		39	4	3
ASV548	Bacteria	Cyanobacteria	Oxyphotobacteria	Chloroplast	marine metagenome	marine metagenome	marine metagenome		15	0	8
ASV549	Bacteria	Cyanobacteria	Oxyphotobacteria	Chloroplast	marine metagenome	marine metagenome	marine metagenome		103	29	12
ASV550	Bacteria	Cyanobacteria	Oxyphotobacteria	Chloroplast	marine metagenome	marine metagenome	marine metagenome		5	13	28
ASV551	Bacteria	Cyanobacteria	Oxyphotobacteria	Chloroplast	marine metagenome	marine metagenome	marine metagenome		6	0	2
ASV552	Bacteria	Cyanobacteria	Oxyphotobacteria	Chloroplast	Marsupiomonas pelliculata	Marsupiomonas pelliculata	Marsupiomonas pelliculata		17	1	0
ASV553	Bacteria	Cyanobacteria	Oxyphotobacteria	Chloroplast	Nephroselmis pyriformis	Nephroselmis pyriformis	Nephroselmis pyriformis		1	1	0
ASV554	Bacteria	Cyanobacteria	Oxyphotobacteria	Chloroplast	Nephroselmis pyriformis	Nephroselmis pyriformis	Nephroselmis pyriformis		4	0	0
ASV555	Bacteria	Cyanobacteria	Oxyphotobacteria	Chloroplast	Nephroselmis pyriformis	Nephroselmis pyriformis	Nephroselmis pyriformis		3	0	0
ASV556	Bacteria	Cyanobacteria	Oxyphotobacteria	Chloroplast	Ochromonas sp. CCMP1393	Ochromonas sp. CCMP1393	Ochromonas sp. CCMP1393		17	1	0
ASV557	Bacteria	Cyanobacteria	Oxyphotobacteria	Chloroplast	Ochrosphaera neapolitana	Ochrosphaera neapolitana	Ochrosphaera neapolitana		13	8	9
ASV558	Bacteria	Cyanobacteria	Oxyphotobacteria	Chloroplast	Ochrosphaera neapolitana	Ochrosphaera neapolitana	Ochrosphaera neapolitana		3	6	3
ASV559	Bacteria	Cyanobacteria	Oxyphotobacteria	Chloroplast	Oophila amblystomatis	Oophila amblystomatis	Oophila amblystomatis		7	0	0
ASV560	Bacteria	Cyanobacteria	Oxyphotobacteria	Chloroplast	Partenskyella glossopodia	Partenskyella glossopodia	Partenskyella glossopodia		6	9	5
ASV561	Bacteria	Cyanobacteria	Oxyphotobacteria	Chloroplast	Partenskyella glossopodia	Partenskyella glossopodia	Partenskyella glossopodia		11	6	2
ASV562	Bacteria	Cyanobacteria	Oxyphotobacteria	Chloroplast	Partenskyella glossopodia	Partenskyella glossopodia	Partenskyella glossopodia		8	9	3
ASV563	Bacteria	Cyanobacteria	Oxyphotobacteria	Chloroplast	Partenskyella glossopodia	Partenskyella glossopodia	Partenskyella glossopodia		2	0	0
ASV564	Bacteria	Cyanobacteria	Oxyphotobacteria	Chloroplast	Phalacroma mitra	Phalacroma mitra	Phalacroma mitra		4	0	0
ASV565	Bacteria	Cyanobacteria	Oxyphotobacteria	Chloroplast	Phalacroma mitra	Phalacroma mitra	Phalacroma mitra		32	5	1
ASV566	Bacteria	Cyanobacteria	Oxyphotobacteria	Chloroplast	Phalacroma mitra	Phalacroma mitra	Phalacroma mitra		9	4	5
ASV567	Bacteria	Cyanobacteria	Oxyphotobacteria	Chloroplast	Phalacroma mitra	Phalacroma mitra	Phalacroma mitra		4	0	0
ASV568	Bacteria	Cyanobacteria	Oxyphotobacteria	Chloroplast	Phalacroma mitra	Phalacroma mitra	Phalacroma mitra		4	0	1
ASV569	Bacteria	Cyanobacteria	Oxyphotobacteria	Chloroplast	Phalacroma mitra	Phalacroma mitra	Phalacroma mitra		27	1	0
ASV570	Bacteria	Cyanobacteria	Oxyphotobacteria	Chloroplast	Phalacroma mitra	Phalacroma mitra	Phalacroma mitra		4	1	1
ASV571	Bacteria	Cyanobacteria	Oxyphotobacteria	Chloroplast	Phalacroma mitra	Phalacroma mitra	Phalacroma mitra		0	2	8
ASV572	Bacteria	Cyanobacteria	Oxyphotobacteria	Chloroplast	Phalacroma mitra	Phalacroma mitra	Phalacroma mitra		4	8	14
ASV573	Bacteria	Cyanobacteria	Oxyphotobacteria	Chloroplast	Phalacroma mitra	Phalacroma mitra	Phalacroma mitra		5	1	0
ASV574	Bacteria	Cyanobacteria	Oxyphotobacteria	Chloroplast	Phalacroma mitra	Phalacroma mitra	Phalacroma mitra		13	1	1
ASV575	Bacteria	Cyanobacteria	Oxyphotobacteria	Chloroplast	Phalacroma mitra	Phalacroma mitra	Phalacroma mitra		0	1	1
ASV576	Bacteria	Cyanobacteria	Oxyphotobacteria	Chloroplast	Phalacroma mitra	Phalacroma mitra	Phalacroma mitra		12	6	3
ASV577	Bacteria	Cyanobacteria	Oxyphotobacteria	Chloroplast	Phalacroma mitra	Phalacroma mitra	Phalacroma mitra		2	1	0
ASV578	Bacteria	Cyanobacteria	Oxyphotobacteria	Chloroplast	Phalacroma mitra	Phalacroma mitra	Phalacroma mitra		6	0	2
ASV579	Bacteria	Cyanobacteria	Oxyphotobacteria	Chloroplast	Phalacroma mitra	Phalacroma mitra	Phalacroma mitra		16	1	6
ASV580	Bacteria	Cyanobacteria	Oxyphotobacteria	Chloroplast	Phalacroma mitra	Phalacroma mitra	Phalacroma mitra		10	21	9
ASV581	Bacteria	Cyanobacteria	Oxyphotobacteria	Chloroplast	Phalacroma mitra	Phalacroma mitra	Phalacroma mitra		0	0	3
ASV582	Bacteria	Cyanobacteria	Oxyphotobacteria	Chloroplast	Phalacroma mitra	Phalacroma mitra	Phalacroma mitra		106	34	37
ASV583	Bacteria	Cyanobacteria	Oxyphotobacteria	Chloroplast	Phalacroma mitra	Phalacroma mitra	Phalacroma mitra		1	1	7
ASV584	Bacteria	Cyanobacteria	Oxyphotobacteria	Chloroplast	Phalacroma mitra	Phalacroma mitra	Phalacroma mitra		5	1	0
ASV585	Bacteria	Cyanobacteria	Oxyphotobacteria	Chloroplast	Phalacroma mitra	Phalacroma mitra	Phalacroma mitra		4	1	1
ASV586	Bacteria	Cyanobacteria	Oxyphotobacteria	Chloroplast	Phalacroma mitra	Phalacroma mitra	Phalacroma mitra		6	0	1
ASV587	Bacteria	Cyanobacteria	Oxyphotobacteria	Chloroplast	Phalacroma mitra	Phalacroma mitra	Phalacroma mitra		31	3	1
ASV588	Bacteria	Cyanobacteria	Oxyphotobacteria	Chloroplast	Phalacroma mitra	Phalacroma mitra	Phalacroma mitra		0	1	1
ASV589	Bacteria	Cyanobacteria	Oxyphotobacteria	Chloroplast	Planoglabratella opercularis	Planoglabratella opercularis	Planoglabratella opercularis		1	1	0
ASV590	Bacteria	Cyanobacteria	Oxyphotobacteria	Chloroplast	Planoglabratella opercularis	Planoglabratella opercularis	Planoglabratella opercularis		1	9	1
ASV591	Bacteria	Cyanobacteria	Oxyphotobacteria	Chloroplast	Planoglabratella opercularis	Planoglabratella opercularis	Planoglabratella opercularis		3	0	0
ASV592	Bacteria	Cyanobacteria	Oxyphotobacteria	Chloroplast	Pleurosigma intermedium	Pleurosigma intermedium	Pleurosigma intermedium		3	4	0
ASV593	Bacteria	Cyanobacteria	Oxyphotobacteria	Chloroplast	Prasinococcus capsulatus	Prasinococcus capsulatus	Prasinococcus capsulatus		2	3	1
ASV594	Bacteria	Cyanobacteria	Oxyphotobacteria	Chloroplast	Prasinococcus sp. CCMP1194	Prasinococcus sp. CCMP1194	Prasinococcus sp. CCMP1194		6	1	0
ASV595	Bacteria	Cyanobacteria	Oxyphotobacteria	Chloroplast	Prasinoderma coloniale	Prasinoderma coloniale	Prasinoderma coloniale		5	0	1
ASV596	Bacteria	Cyanobacteria	Oxyphotobacteria	Chloroplast	Prasinoderma coloniale	Prasinoderma coloniale	Prasinoderma coloniale		6	2	1
ASV597	Bacteria	Cyanobacteria	Oxyphotobacteria	Chloroplast	Prasinoderma coloniale	Prasinoderma coloniale	Prasinoderma coloniale		18	25	19
ASV598	Bacteria	Cyanobacteria	Oxyphotobacteria	Chloroplast	Prasinoderma coloniale	Prasinoderma coloniale	Prasinoderma coloniale		1	0	1
ASV599	Bacteria	Cyanobacteria	Oxyphotobacteria	Chloroplast	Prasinoderma coloniale	Prasinoderma coloniale	Prasinoderma coloniale		7	0	0
ASV600	Bacteria	Cyanobacteria	Oxyphotobacteria	Chloroplast	Prasinoderma coloniale	Prasinoderma coloniale	Prasinoderma coloniale		2	0	1
ASV601	Bacteria	Cyanobacteria	Oxyphotobacteria	Chloroplast	Prasinophyceae sp. CCMP1205	Prasinophyceae sp. CCMP1205	Prasinophyceae sp. CCMP1205		120	35	20
ASV602	Bacteria	Cyanobacteria	Oxyphotobacteria	Chloroplast	Prasinophyceae sp. MBIC10622	Prasinophyceae sp. MBIC10622	Prasinophyceae sp. MBIC10622		37	4	1
ASV603	Bacteria	Cyanobacteria	Oxyphotobacteria	Chloroplast	Prasinophyceae sp. MBIC10622	Prasinophyceae sp. MBIC10622	Prasinophyceae sp. MBIC10622		2	0	0
ASV604	Bacteria	Cyanobacteria	Oxyphotobacteria	Chloroplast	Prasinophyceae sp. MBIC10622	Prasinophyceae sp. MBIC10622	Prasinophyceae sp. MBIC10622		0	2	1
ASV605	Bacteria	Cyanobacteria	Oxyphotobacteria	Chloroplast	Proboscia inermis	Proboscia inermis	Proboscia inermis		37	6	8
ASV606	Bacteria	Cyanobacteria	Oxyphotobacteria	Chloroplast	Proboscia inermis	Proboscia inermis	Proboscia inermis		4	2	0
ASV607	Bacteria	Cyanobacteria	Oxyphotobacteria	Chloroplast	Pseudoneochloris marina	Pseudoneochloris marina	Pseudoneochloris marina		2	0	0
ASV608	Bacteria	Cyanobacteria	Oxyphotobacteria	Chloroplast	Pseudoneochloris marina	Pseudoneochloris marina	Pseudoneochloris marina		3	0	0
ASV609	Bacteria	Cyanobacteria	Oxyphotobacteria	Chloroplast	Pyramimonas olivacea	Pyramimonas olivacea	Pyramimonas olivacea		12	3	1
ASV610	Bacteria	Cyanobacteria	Oxyphotobacteria	Chloroplast	Pyramimonas parkeae	Pyramimonas parkeae	Pyramimonas parkeae		98	22	21
ASV611	Bacteria	Cyanobacteria	Oxyphotobacteria	Chloroplast	Pyramimonas parkeae	Pyramimonas parkeae	Pyramimonas parkeae		36	32	20
ASV612	Bacteria	Cyanobacteria	Oxyphotobacteria	Chloroplast	Pyramimonas tetrarhynchus	Pyramimonas tetrarhynchus	Pyramimonas tetrarhynchus		6	5	0
ASV613	Bacteria	Cyanobacteria	Oxyphotobacteria	Chloroplast	Resultomonas moestrupii	Resultomonas moestrupii	Resultomonas moestrupii		24	0	0
ASV614	Bacteria	Cyanobacteria	Oxyphotobacteria	Chloroplast	Tetraselmis marina	Tetraselmis marina	Tetraselmis marina		4	0	0
ASV615	Bacteria	Cyanobacteria	Oxyphotobacteria	Chloroplast	Tetraselmis marina	Tetraselmis marina	Tetraselmis marina		19	12	1
ASV616	Bacteria	Cyanobacteria	Oxyphotobacteria	Chloroplast	Tetraselmis marina	Tetraselmis marina	Tetraselmis marina		7	1	0
ASV617	Bacteria	Cyanobacteria	Oxyphotobacteria	Chloroplast	Tetraselmis marina	Tetraselmis marina	Tetraselmis marina		19	1	0
ASV618	Bacteria	Cyanobacteria	Oxyphotobacteria	Chloroplast	Tetraselmis marina	Tetraselmis marina	Tetraselmis marina		70	32	16
ASV619	Bacteria	Cyanobacteria	Oxyphotobacteria	Chloroplast	Tetraselmis marina	Tetraselmis marina	Tetraselmis marina		20	13	5
ASV620	Bacteria	Cyanobacteria	Oxyphotobacteria	Chloroplast	Tetraselmis subcordiformis	Tetraselmis subcordiformis	Tetraselmis subcordiformis		1	2	0
ASV621	Bacteria	Cyanobacteria	Oxyphotobacteria	Chloroplast	uncultured bacterium	uncultured bacterium	uncultured bacterium		6	0	0
ASV622	Bacteria	Cyanobacteria	Oxyphotobacteria	Chloroplast	uncultured bacterium	uncultured bacterium	uncultured bacterium		10	2	5
ASV623	Bacteria	Cyanobacteria	Oxyphotobacteria	Chloroplast	uncultured bacterium	uncultured bacterium	uncultured bacterium		10	1	0
ASV624	Bacteria	Cyanobacteria	Oxyphotobacteria	Chloroplast	uncultured bacterium	uncultured bacterium	uncultured bacterium		10	1	0
ASV625	Bacteria	Cyanobacteria	Oxyphotobacteria	Chloroplast	uncultured bacterium	uncultured bacterium	uncultured bacterium		65	35	30
ASV626	Bacteria	Cyanobacteria	Oxyphotobacteria	Chloroplast	uncultured bacterium	uncultured bacterium	uncultured bacterium		1	2	1
ASV627	Bacteria	Cyanobacteria	Oxyphotobacteria	Chloroplast	uncultured bacterium	uncultured bacterium	uncultured bacterium		0	2	1
ASV628	Bacteria	Cyanobacteria	Oxyphotobacteria	Chloroplast	uncultured bacterium	uncultured bacterium	uncultured bacterium		17	3	0
ASV629	Bacteria	Cyanobacteria	Oxyphotobacteria	Chloroplast	uncultured bacterium	uncultured bacterium	uncultured bacterium		11	0	0
ASV630	Bacteria	Cyanobacteria	Oxyphotobacteria	Chloroplast	uncultured bacterium	uncultured bacterium	uncultured bacterium		2	0	1
ASV631	Bacteria	Cyanobacteria	Oxyphotobacteria	Chloroplast	uncultured bacterium	uncultured bacterium	uncultured bacterium		1	0	1
ASV632	Bacteria	Cyanobacteria	Oxyphotobacteria	Chloroplast	uncultured bacterium	uncultured bacterium	uncultured bacterium		4	0	0
ASV633	Bacteria	Cyanobacteria	Oxyphotobacteria	Chloroplast	uncultured Cryptomonadaceae	uncultured Cryptomonadaceae	uncultured Cryptomonadaceae		45	27	22
ASV634	Bacteria	Cyanobacteria	Oxyphotobacteria	Chloroplast	uncultured Cryptomonadaceae	uncultured Cryptomonadaceae	uncultured Cryptomonadaceae		102	17	4
ASV635	Bacteria	Cyanobacteria	Oxyphotobacteria	Chloroplast	uncultured Cryptomonadaceae	uncultured Cryptomonadaceae	uncultured Cryptomonadaceae		55	2	1
ASV636	Bacteria	Cyanobacteria	Oxyphotobacteria	Chloroplast	uncultured Cryptomonadaceae	uncultured Cryptomonadaceae	uncultured Cryptomonadaceae		20	2	0
ASV637	Bacteria	Cyanobacteria	Oxyphotobacteria	Chloroplast	uncultured Cryptomonadaceae	uncultured Cryptomonadaceae	uncultured Cryptomonadaceae		8	2	1
ASV638	Bacteria	Cyanobacteria	Oxyphotobacteria	Chloroplast	uncultured Cryptomonadaceae	uncultured Cryptomonadaceae	uncultured Cryptomonadaceae		65	35	29
ASV639	Bacteria	Cyanobacteria	Oxyphotobacteria	Chloroplast	uncultured Cryptomonadaceae	uncultured Cryptomonadaceae	uncultured Cryptomonadaceae		3	7	3
ASV640	Bacteria	Cyanobacteria	Oxyphotobacteria	Chloroplast	uncultured diatom	uncultured diatom	uncultured diatom		5	0	0
ASV641	Bacteria	Cyanobacteria	Oxyphotobacteria	Chloroplast	uncultured diatom	uncultured diatom	uncultured diatom		2	1	0
ASV642	Bacteria	Cyanobacteria	Oxyphotobacteria	Chloroplast	uncultured diatom	uncultured diatom	uncultured diatom		2	1	0
ASV643	Bacteria	Cyanobacteria	Oxyphotobacteria	Chloroplast	uncultured marine eukaryote	uncultured marine eukaryote	uncultured marine eukaryote		1	1	5
ASV644	Bacteria	Cyanobacteria	Oxyphotobacteria	Chloroplast	uncultured marine eukaryote	uncultured marine eukaryote	uncultured marine eukaryote		7	1	1
ASV645	Bacteria	Cyanobacteria	Oxyphotobacteria	Chloroplast	uncultured marine eukaryote	uncultured marine eukaryote	uncultured marine eukaryote		6	0	0
ASV646	Bacteria	Cyanobacteria	Oxyphotobacteria	Chloroplast	uncultured marine eukaryote	uncultured marine eukaryote	uncultured marine eukaryote		0	3	1
ASV647	Bacteria	Cyanobacteria	Oxyphotobacteria	Chloroplast	uncultured marine eukaryote	uncultured marine eukaryote	uncultured marine eukaryote		1	1	0
ASV648	Bacteria	Cyanobacteria	Oxyphotobacteria	Chloroplast	uncultured marine eukaryote	uncultured marine eukaryote	uncultured marine eukaryote		2	0	0
ASV649	Bacteria	Cyanobacteria	Oxyphotobacteria	Chloroplast	uncultured marine eukaryote	uncultured marine eukaryote	uncultured marine eukaryote		2	0	0
ASV650	Bacteria	Cyanobacteria	Oxyphotobacteria	Chloroplast	uncultured marine eukaryote	uncultured marine eukaryote	uncultured marine eukaryote		1	1	0
ASV651	Bacteria	Cyanobacteria	Oxyphotobacteria	Chloroplast	uncultured marine eukaryote	uncultured marine eukaryote	uncultured marine eukaryote		1	0	4
ASV652	Bacteria	Cyanobacteria	Oxyphotobacteria	Chloroplast	uncultured marine eukaryote	uncultured marine eukaryote	uncultured marine eukaryote		0	1	1
ASV653	Bacteria	Cyanobacteria	Oxyphotobacteria	Chloroplast	uncultured marine eukaryote	uncultured marine eukaryote	uncultured marine eukaryote		0	1	4
ASV654	Bacteria	Cyanobacteria	Oxyphotobacteria	Chloroplast	uncultured marine eukaryote	uncultured marine eukaryote	uncultured marine eukaryote		1	1	0
ASV655	Bacteria	Cyanobacteria	Oxyphotobacteria	Chloroplast	uncultured marine eukaryote	uncultured marine eukaryote	uncultured marine eukaryote		2	0	0
ASV656	Bacteria	Cyanobacteria	Oxyphotobacteria	Chloroplast	uncultured marine eukaryote	uncultured marine eukaryote	uncultured marine eukaryote		3	5	18
ASV657	Bacteria	Cyanobacteria	Oxyphotobacteria	Chloroplast	uncultured marine eukaryote	uncultured marine eukaryote	uncultured marine eukaryote		3	1	1
ASV658	Bacteria	Cyanobacteria	Oxyphotobacteria	Chloroplast	uncultured marine eukaryote	uncultured marine eukaryote	uncultured marine eukaryote		16	6	1
ASV659	Bacteria	Cyanobacteria	Oxyphotobacteria	Chloroplast	uncultured marine eukaryote	uncultured marine eukaryote	uncultured marine eukaryote		0	1	2
ASV660	Bacteria	Cyanobacteria	Oxyphotobacteria	Chloroplast	uncultured marine eukaryote	uncultured marine eukaryote	uncultured marine eukaryote		0	0	3
ASV661	Bacteria	Cyanobacteria	Oxyphotobacteria	Chloroplast	uncultured marine eukaryote	uncultured marine eukaryote	uncultured marine eukaryote		0	0	2
ASV662	Bacteria	Cyanobacteria	Oxyphotobacteria	Chloroplast	uncultured marine eukaryote	uncultured marine eukaryote	uncultured marine eukaryote		0	1	1
ASV663	Bacteria	Cyanobacteria	Oxyphotobacteria	Chloroplast	uncultured marine eukaryote	uncultured marine eukaryote	uncultured marine eukaryote		0	0	2
ASV664	Bacteria	Cyanobacteria	Oxyphotobacteria	Chloroplast	uncultured marine eukaryote	uncultured marine eukaryote	uncultured marine eukaryote		13	1	1
ASV665	Bacteria	Cyanobacteria	Oxyphotobacteria	Chloroplast	uncultured marine eukaryote	uncultured marine eukaryote	uncultured marine eukaryote		2	0	1
ASV666	Bacteria	Cyanobacteria	Oxyphotobacteria	Chloroplast	uncultured marine eukaryote	uncultured marine eukaryote	uncultured marine eukaryote		9	0	2
ASV667	Bacteria	Cyanobacteria	Oxyphotobacteria	Chloroplast	uncultured marine eukaryote	uncultured marine eukaryote	uncultured marine eukaryote		6	1	0
ASV668	Bacteria	Cyanobacteria	Oxyphotobacteria	Chloroplast	uncultured marine microorganism	uncultured marine microorganism	uncultured marine microorganism		41	20	20
ASV669	Bacteria	Cyanobacteria	Oxyphotobacteria	Chloroplast	uncultured marine microorganism	uncultured marine microorganism	uncultured marine microorganism		77	33	21
ASV670	Bacteria	Cyanobacteria	Oxyphotobacteria	Chloroplast	uncultured marine rappemonad	uncultured marine rappemonad	uncultured marine rappemonad		5	0	0
ASV671	Bacteria	Cyanobacteria	Oxyphotobacteria	Chloroplast	uncultured prymnesiophyte C8704	uncultured prymnesiophyte C8704	uncultured prymnesiophyte C8704		0	2	16
ASV672	Bacteria	Cyanobacteria	Oxyphotobacteria	Chloroplast	uncultured soil bacterium	uncultured soil bacterium	uncultured soil bacterium		2	1	3
ASV673	Bacteria	Cyanobacteria	Oxyphotobacteria	Chloroplast	unidentified marine bacterioplankton	unidentified marine bacterioplankton	unidentified marine bacterioplankton		0	2	4
ASV674	Bacteria	Cyanobacteria	Oxyphotobacteria	Chloroplast	unidentified marine bacterioplankton	unidentified marine bacterioplankton	unidentified marine bacterioplankton		4	0	0
ASV675	Bacteria	Cyanobacteria	Oxyphotobacteria	Chloroplast	unidentified marine bacterioplankton	unidentified marine bacterioplankton	unidentified marine bacterioplankton		12	2	2
ASV676	Bacteria	Cyanobacteria	Oxyphotobacteria	Chloroplast	unidentified marine bacterioplankton	unidentified marine bacterioplankton	unidentified marine bacterioplankton		7	3	2
ASV677	Bacteria	Cyanobacteria	Oxyphotobacteria	Chloroplast	unidentified marine bacterioplankton	unidentified marine bacterioplankton	unidentified marine bacterioplankton		89	13	7
ASV678	Bacteria	Cyanobacteria	Oxyphotobacteria	Chloroplast	unidentified marine bacterioplankton	unidentified marine bacterioplankton	unidentified marine bacterioplankton		17	3	6
ASV679	Bacteria	Cyanobacteria	Oxyphotobacteria	Chloroplast	unidentified marine bacterioplankton	unidentified marine bacterioplankton	unidentified marine bacterioplankton		7	0	0
ASV680	Bacteria	Cyanobacteria	Oxyphotobacteria	Chloroplast	unidentified marine bacterioplankton	unidentified marine bacterioplankton	unidentified marine bacterioplankton		0	1	4
ASV681	Bacteria	Cyanobacteria	Oxyphotobacteria	Chloroplast	unidentified marine bacterioplankton	unidentified marine bacterioplankton	unidentified marine bacterioplankton		26	10	13
ASV682	Bacteria	Cyanobacteria	Oxyphotobacteria	Chloroplast	unidentified marine bacterioplankton	unidentified marine bacterioplankton	unidentified marine bacterioplankton		0	0	2
ASV683	Bacteria	Cyanobacteria	Oxyphotobacteria	Chloroplast	unidentified marine bacterioplankton	unidentified marine bacterioplankton	unidentified marine bacterioplankton		2	0	0
ASV684	Bacteria	Cyanobacteria	Oxyphotobacteria	Chloroplast	unidentified marine bacterioplankton	unidentified marine bacterioplankton	unidentified marine bacterioplankton		6	1	2
ASV685	Bacteria	Cyanobacteria	Oxyphotobacteria	Chloroplast	unidentified rhodophyte PRD01a010B	unidentified rhodophyte PRD01a010B	unidentified rhodophyte PRD01a010B		19	3	16
ASV686	Bacteria	Cyanobacteria	Oxyphotobacteria	Chloroplast	unidentified rhodophyte PRD01a010B	unidentified rhodophyte PRD01a010B	unidentified rhodophyte PRD01a010B		1	2	5
ASV687	Bacteria	Cyanobacteria	Oxyphotobacteria	Chloroplast	unidentified rhodophyte PRD01a010B	unidentified rhodophyte PRD01a010B	unidentified rhodophyte PRD01a010B		3	0	0
ASV688	Bacteria	Cyanobacteria	Oxyphotobacteria	Chloroplast	unidentified rhodophyte PRD01a010B	unidentified rhodophyte PRD01a010B	unidentified rhodophyte PRD01a010B		6	0	0
ASV689	Bacteria	Cyanobacteria	Oxyphotobacteria	Chloroplast	unidentified rhodophyte PRD01a010B	unidentified rhodophyte PRD01a010B	unidentified rhodophyte PRD01a010B		6	0	0
ASV690	Bacteria	Cyanobacteria	Oxyphotobacteria	Chloroplast	unidentified rhodophyte PRD01a010B	unidentified rhodophyte PRD01a010B	unidentified rhodophyte PRD01a010B		13	1	2
ASV691	Bacteria	Cyanobacteria	Oxyphotobacteria	Chloroplast	unidentified rhodophyte PRD01a010B	unidentified rhodophyte PRD01a010B	unidentified rhodophyte PRD01a010B		23	6	13
ASV692	Bacteria	Cyanobacteria	Oxyphotobacteria	Chloroplast	unidentified rhodophyte PRD01a010B	unidentified rhodophyte PRD01a010B	unidentified rhodophyte PRD01a010B		11	4	2
ASV693	Bacteria	Cyanobacteria	Oxyphotobacteria	Chloroplast	unidentified rhodophyte PRD01a010B	unidentified rhodophyte PRD01a010B	unidentified rhodophyte PRD01a010B		3	0	0
ASV694	Bacteria	Cyanobacteria	Oxyphotobacteria	Chloroplast	unidentified rhodophyte PRD01a010B	unidentified rhodophyte PRD01a010B	unidentified rhodophyte PRD01a010B		0	2	2
ASV695	Bacteria	Cyanobacteria	Oxyphotobacteria	Chloroplast	Virgulinella fragilis	Virgulinella fragilis	Virgulinella fragilis		5	0	0
ASV696	Bacteria	Cyanobacteria	Oxyphotobacteria	Chloroplast	Virgulinella fragilis	Virgulinella fragilis	Virgulinella fragilis		20	0	0
ASV697	Bacteria	Cyanobacteria	Oxyphotobacteria	Chloroplast	Virgulinella fragilis	Virgulinella fragilis	Virgulinella fragilis		2	0	0
ASV698	Bacteria	Cyanobacteria	Oxyphotobacteria	Chloroplast	Virgulinella fragilis	Virgulinella fragilis	Virgulinella fragilis		5	0	0
ASV699	Bacteria	Cyanobacteria	Oxyphotobacteria	Chloroplast	Virgulinella fragilis	Virgulinella fragilis	Virgulinella fragilis		9	2	0
ASV700	Bacteria	Cyanobacteria	Oxyphotobacteria	Chloroplast					7	2	2
ASV701	Bacteria	Cyanobacteria	Oxyphotobacteria	Chloroplast					4	0	0
ASV702	Bacteria	Cyanobacteria	Oxyphotobacteria	Chloroplast					2	1	4
ASV703	Bacteria	Cyanobacteria	Oxyphotobacteria	Chloroplast					12	0	0
ASV704	Bacteria	Cyanobacteria	Oxyphotobacteria	Chloroplast					12	1	1
ASV705	Bacteria	Cyanobacteria	Oxyphotobacteria	Chloroplast					61	8	4
ASV706	Bacteria	Cyanobacteria	Oxyphotobacteria	Chloroplast					2	0	1
ASV707	Bacteria	Cyanobacteria	Oxyphotobacteria	Chloroplast					18	3	1
ASV708	Bacteria	Cyanobacteria	Oxyphotobacteria	Chloroplast					29	2	1
ASV709	Bacteria	Cyanobacteria	Oxyphotobacteria	Chloroplast					21	8	6
ASV710	Bacteria	Cyanobacteria	Oxyphotobacteria	Chloroplast					91	31	23
ASV711	Bacteria	Cyanobacteria	Oxyphotobacteria	Chloroplast					3	0	2
ASV712	Bacteria	Cyanobacteria	Oxyphotobacteria	Chloroplast					4	1	0
ASV713	Bacteria	Cyanobacteria	Oxyphotobacteria	Chloroplast					0	1	2
ASV714	Bacteria	Cyanobacteria	Oxyphotobacteria	Chloroplast					0	0	3
ASV715	Bacteria	Cyanobacteria	Oxyphotobacteria	Chloroplast					3	0	0
ASV716	Bacteria	Cyanobacteria	Oxyphotobacteria	Chloroplast					0	0	4
ASV717	Bacteria	Cyanobacteria	Oxyphotobacteria	Chloroplast					2	1	0
ASV718	Bacteria	Cyanobacteria	Oxyphotobacteria	Chloroplast					14	1	1
ASV719	Bacteria	Cyanobacteria	Oxyphotobacteria	Chloroplast					10	2	0
ASV720	Bacteria	Cyanobacteria	Oxyphotobacteria	Chloroplast					16	0	0
ASV721	Bacteria	Cyanobacteria	Oxyphotobacteria	Chloroplast					0	2	16
ASV722	Bacteria	Cyanobacteria	Oxyphotobacteria	Chloroplast					4	0	0
ASV723	Bacteria	Cyanobacteria	Oxyphotobacteria	Chloroplast					5	2	2
ASV724	Bacteria	Cyanobacteria	Oxyphotobacteria	Chloroplast					5	0	0
ASV725	Bacteria	Cyanobacteria	Oxyphotobacteria	Chloroplast					26	3	0
ASV726	Bacteria	Cyanobacteria	Oxyphotobacteria	Chloroplast					13	6	1
ASV727	Bacteria	Cyanobacteria	Oxyphotobacteria	Chloroplast					67	16	14
ASV728	Bacteria	Cyanobacteria	Oxyphotobacteria	Chloroplast					2	0	0
ASV729	Bacteria	Cyanobacteria	Oxyphotobacteria	Chloroplast					22	13	1
ASV730	Bacteria	Cyanobacteria	Oxyphotobacteria	Chloroplast					24	3	1
ASV731	Bacteria	Cyanobacteria	Oxyphotobacteria	Chloroplast					7	0	1
ASV732	Bacteria	Cyanobacteria	Oxyphotobacteria	Chloroplast					17	5	1
ASV733	Bacteria	Cyanobacteria	Oxyphotobacteria	Chloroplast					17	1	4
ASV734	Bacteria	Cyanobacteria	Oxyphotobacteria	Chloroplast					2	0	0
ASV735	Bacteria	Cyanobacteria	Oxyphotobacteria	Chloroplast					37	17	11
ASV736	Bacteria	Cyanobacteria	Oxyphotobacteria	Chloroplast					41	6	2
ASV737	Bacteria	Cyanobacteria	Oxyphotobacteria	Chloroplast					1	8	11
ASV738	Bacteria	Cyanobacteria	Oxyphotobacteria	Chloroplast					2	0	0
ASV739	Bacteria	Cyanobacteria	Oxyphotobacteria	Chloroplast					59	16	10
ASV740	Bacteria	Cyanobacteria	Oxyphotobacteria	Chloroplast					40	3	0
ASV741	Bacteria	Cyanobacteria	Oxyphotobacteria	Chloroplast					2	0	0
ASV742	Bacteria	Cyanobacteria	Oxyphotobacteria	Chloroplast					1	1	1
ASV743	Bacteria	Cyanobacteria	Oxyphotobacteria	Chloroplast					34	8	6
ASV744	Bacteria	Cyanobacteria	Oxyphotobacteria	Chloroplast					4	3	1
ASV745	Bacteria	Cyanobacteria	Oxyphotobacteria	Chloroplast					5	4	1
ASV746	Bacteria	Cyanobacteria	Oxyphotobacteria	Chloroplast					11	0	0
ASV747	Bacteria	Cyanobacteria	Oxyphotobacteria	Chloroplast					47	7	11
ASV748	Bacteria	Cyanobacteria	Oxyphotobacteria	Chloroplast					2	0	0
ASV749	Bacteria	Cyanobacteria	Oxyphotobacteria	Chloroplast					10	13	6
ASV750	Bacteria	Cyanobacteria	Oxyphotobacteria	Chloroplast					0	1	6
ASV751	Bacteria	Cyanobacteria	Oxyphotobacteria	Chloroplast					41	12	32
ASV752	Bacteria	Cyanobacteria	Oxyphotobacteria	Chloroplast					1	1	2
ASV753	Bacteria	Cyanobacteria	Oxyphotobacteria	Chloroplast					45	9	2
ASV754	Bacteria	Cyanobacteria	Oxyphotobacteria	Chloroplast					25	0	0
ASV755	Bacteria	Cyanobacteria	Oxyphotobacteria	Chloroplast					9	3	5
ASV756	Bacteria	Cyanobacteria	Oxyphotobacteria	Chloroplast					115	40	40
ASV757	Bacteria	Cyanobacteria	Oxyphotobacteria	Chloroplast					3	0	0
ASV758	Bacteria	Cyanobacteria	Oxyphotobacteria	Chloroplast					2	0	1
ASV759	Bacteria	Cyanobacteria	Oxyphotobacteria	Chloroplast					4	0	0
ASV760	Bacteria	Cyanobacteria	Oxyphotobacteria	Chloroplast					21	2	0
ASV761	Bacteria	Cyanobacteria	Oxyphotobacteria	Chloroplast					10	1	0
ASV762	Bacteria	Cyanobacteria	Oxyphotobacteria	Chloroplast					13	2	1
ASV763	Bacteria	Cyanobacteria	Oxyphotobacteria	Chloroplast					4	4	1
ASV764	Bacteria	Cyanobacteria	Oxyphotobacteria	Chloroplast					5	2	2
ASV765	Bacteria	Cyanobacteria	Oxyphotobacteria	Chloroplast					82	26	22
ASV766	Bacteria	Cyanobacteria	Oxyphotobacteria	Chloroplast					1	0	1
ASV767	Bacteria	Cyanobacteria	Oxyphotobacteria	Chloroplast					67	11	15
ASV768	Bacteria	Cyanobacteria	Oxyphotobacteria	Chloroplast					0	0	2
ASV769	Bacteria	Cyanobacteria	Oxyphotobacteria	Chloroplast					7	0	0
ASV770	Bacteria	Cyanobacteria	Oxyphotobacteria	Chloroplast					6	0	0
ASV771	Bacteria	Cyanobacteria	Oxyphotobacteria	Chloroplast					0	4	18
ASV772	Bacteria	Cyanobacteria	Oxyphotobacteria	Chloroplast					0	3	2
ASV773	Bacteria	Cyanobacteria	Oxyphotobacteria	Chloroplast					4	1	0
ASV774	Bacteria	Cyanobacteria	Oxyphotobacteria	Chloroplast					0	3	0
ASV775	Bacteria	Cyanobacteria	Oxyphotobacteria	Chloroplast					7	1	0
ASV776	Bacteria	Cyanobacteria	Oxyphotobacteria	Chloroplast					0	0	2
ASV777	Bacteria	Cyanobacteria	Oxyphotobacteria	Chloroplast					2	4	0
ASV778	Bacteria	Cyanobacteria	Oxyphotobacteria	Chloroplast					0	4	15
ASV779	Bacteria	Cyanobacteria	Oxyphotobacteria	Chloroplast					5	1	2
ASV780	Bacteria	Cyanobacteria	Oxyphotobacteria	Chloroplast					0	1	2
ASV781	Bacteria	Cyanobacteria	Oxyphotobacteria	Chloroplast					3	0	0
ASV782	Bacteria	Cyanobacteria	Oxyphotobacteria	Chloroplast					15	8	8
ASV783	Bacteria	Cyanobacteria	Oxyphotobacteria	Chloroplast					10	1	2
ASV784	Bacteria	Cyanobacteria	Oxyphotobacteria	Chloroplast					6	1	0
ASV785	Bacteria	Cyanobacteria	Oxyphotobacteria	Chloroplast					10	1	0
ASV786	Bacteria	Cyanobacteria	Oxyphotobacteria	Chloroplast					4	0	0
ASV787	Bacteria	Cyanobacteria	Oxyphotobacteria	Chloroplast					4	0	0
ASV788	Bacteria	Cyanobacteria	Oxyphotobacteria	Chloroplast					5	0	0
ASV789	Bacteria	Cyanobacteria	Oxyphotobacteria	Chloroplast					74	14	5
ASV790	Bacteria	Cyanobacteria	Oxyphotobacteria	Chloroplast					0	0	2
ASV791	Bacteria	Cyanobacteria	Oxyphotobacteria	Chloroplast					8	0	1
ASV792	Bacteria	Cyanobacteria	Oxyphotobacteria	Chloroplast					1	2	1
ASV793	Bacteria	Cyanobacteria	Oxyphotobacteria	Chloroplast					21	1	1
ASV794	Bacteria	Cyanobacteria	Oxyphotobacteria	Chloroplast					0	0	2
ASV795	Bacteria	Cyanobacteria	Oxyphotobacteria	Chloroplast					1	0	2
ASV796	Bacteria	Cyanobacteria	Oxyphotobacteria	Chloroplast					120	40	30
ASV797	Bacteria	Cyanobacteria	Oxyphotobacteria	Chloroplast					0	2	0
ASV798	Bacteria	Cyanobacteria	Oxyphotobacteria	Chloroplast					8	3	1
ASV799	Bacteria	Cyanobacteria	Oxyphotobacteria	Chloroplast					2	0	0
ASV800	Bacteria	Cyanobacteria	Oxyphotobacteria	Chloroplast					15	4	1
ASV801	Bacteria	Cyanobacteria	Oxyphotobacteria	Chloroplast					7	10	1
ASV802	Bacteria	Cyanobacteria	Oxyphotobacteria	Chloroplast					2	0	0
ASV803	Bacteria	Cyanobacteria	Oxyphotobacteria	Chloroplast					2	0	0
ASV804	Bacteria	Cyanobacteria	Oxyphotobacteria	Chloroplast					4	0	0
ASV805	Bacteria	Cyanobacteria	Oxyphotobacteria	Chloroplast					11	1	0
ASV806	Bacteria	Cyanobacteria	Oxyphotobacteria	Chloroplast					16	5	1
ASV807	Bacteria	Cyanobacteria	Oxyphotobacteria	Chloroplast					3	1	0
ASV808	Bacteria	Cyanobacteria	Oxyphotobacteria	Chloroplast					3	1	3
ASV809	Bacteria	Cyanobacteria	Oxyphotobacteria	Chloroplast					37	11	11
ASV810	Bacteria	Cyanobacteria	Oxyphotobacteria	Chloroplast					3	0	0
ASV811	Bacteria	Cyanobacteria	Oxyphotobacteria	Chloroplast					0	1	1
ASV812	Bacteria	Cyanobacteria	Oxyphotobacteria	Chloroplast					0	2	6
ASV813	Bacteria	Cyanobacteria	Oxyphotobacteria	Chloroplast					2	0	2
ASV814	Bacteria	Cyanobacteria	Oxyphotobacteria	Chloroplast					2	0	0
ASV815	Bacteria	Cyanobacteria	Oxyphotobacteria	Chloroplast					4	0	0
ASV816	Bacteria	Cyanobacteria	Oxyphotobacteria	Chloroplast					32	7	12
ASV817	Bacteria	Cyanobacteria	Oxyphotobacteria	Chloroplast					11	1	1
ASV818	Bacteria	Cyanobacteria	Oxyphotobacteria	Chloroplast					17	3	2
ASV819	Bacteria	Cyanobacteria	Oxyphotobacteria	Chloroplast					4	0	0
ASV820	Bacteria	Cyanobacteria	Oxyphotobacteria	Chloroplast					6	0	0
ASV821	Bacteria	Cyanobacteria	Oxyphotobacteria	Chloroplast					5	0	0
ASV822	Bacteria	Cyanobacteria	Oxyphotobacteria	Chloroplast					6	1	0
ASV823	Bacteria	Cyanobacteria	Oxyphotobacteria	Chloroplast					8	2	0
ASV824	Bacteria	Cyanobacteria	Oxyphotobacteria	Chloroplast					2	0	0
ASV825	Bacteria	Cyanobacteria	Oxyphotobacteria	Chloroplast					4	0	0
ASV826	Bacteria	Cyanobacteria	Oxyphotobacteria	Chloroplast					1	1	5
ASV827	Bacteria	Cyanobacteria	Oxyphotobacteria	Chloroplast					16	0	1
ASV828	Bacteria	Cyanobacteria	Oxyphotobacteria	Chloroplast					17	3	0
ASV829	Bacteria	Cyanobacteria	Oxyphotobacteria	Chloroplast					0	1	3
ASV830	Bacteria	Cyanobacteria	Oxyphotobacteria	Chloroplast					117	32	35
ASV831	Bacteria	Cyanobacteria	Oxyphotobacteria	Chloroplast					8	0	4
ASV832	Bacteria	Cyanobacteria	Oxyphotobacteria	Chloroplast					59	14	9
ASV833	Bacteria	Cyanobacteria	Oxyphotobacteria	Chloroplast					1	0	1
ASV834	Bacteria	Cyanobacteria	Oxyphotobacteria	Chloroplast					5	0	0
ASV835	Bacteria	Cyanobacteria	Oxyphotobacteria	Chloroplast					5	0	0
ASV836	Bacteria	Cyanobacteria	Oxyphotobacteria	Chloroplast					3	0	0
ASV837	Bacteria	Cyanobacteria	Oxyphotobacteria	Chloroplast					0	1	3
ASV838	Bacteria	Cyanobacteria	Oxyphotobacteria	Chloroplast					1	2	1
ASV839	Bacteria	Cyanobacteria	Oxyphotobacteria	Chloroplast					14	1	0
ASV840	Bacteria	Cyanobacteria	Oxyphotobacteria	Chloroplast					1	1	0
ASV841	Bacteria	Cyanobacteria	Oxyphotobacteria	Chloroplast					2	1	0
ASV842	Bacteria	Cyanobacteria	Oxyphotobacteria	Chloroplast					6	6	0
ASV843	Bacteria	Cyanobacteria	Oxyphotobacteria	Chloroplast					2	1	1
ASV844	Bacteria	Cyanobacteria	Oxyphotobacteria	Chloroplast					2	0	0
ASV845	Bacteria	Cyanobacteria	Oxyphotobacteria	Chloroplast					10	2	0
ASV846	Bacteria	Cyanobacteria	Oxyphotobacteria	Nostocales	Microcystaceae	Atelocyanobacterium (UCYN-A)	Ambiguous_taxa		2	4	19
ASV847	Bacteria	Cyanobacteria	Oxyphotobacteria	Nostocales	Microcystaceae	Atelocyanobacterium (UCYN-A)	Ambiguous_taxa		7	1	0
ASV848	Bacteria	Cyanobacteria	Oxyphotobacteria	Nostocales	Microcystaceae	Atelocyanobacterium (UCYN-A)	Ambiguous_taxa		7	0	0
ASV849	Bacteria	Cyanobacteria	Oxyphotobacteria	Nostocales	Microcystaceae	Crocosphaera WH 0003 (UCYN-B)	Ambiguous_taxa		0	1	6
ASV850	Bacteria	Cyanobacteria	Oxyphotobacteria	Nostocales	Microcystaceae	Crocosphaera WH 0003 (UCYN-B)	Ambiguous_taxa		1	1	3
ASV851	Bacteria	Cyanobacteria	Oxyphotobacteria	Nostocales	Phormidiaceae	Trichodesmium IMS101	Ambiguous_taxa		0	2	7
ASV852	Bacteria	Cyanobacteria	Oxyphotobacteria	Nostocales	Prochloraceae	Prochloron P1-Palau	Ambiguous_taxa		2	0	0
ASV853	Bacteria	Cyanobacteria	Oxyphotobacteria	Nostocales					0	2	1
ASV854	Bacteria	Cyanobacteria	Oxyphotobacteria	Phormidesmiales	Nodosilineaceae	Nodosilinea PCC-7104	uncultured bacterium		2	0	0
ASV855	Bacteria	Cyanobacteria	Oxyphotobacteria	Phormidesmiales	Phormidesmiaceae	Acrophormium PCC-7375			0	1	1
ASV856	Bacteria	Cyanobacteria	Oxyphotobacteria	Phormidesmiales	Phormidesmiaceae	uncultured	uncultured bacterium		2	1	1
ASV857	Bacteria	Cyanobacteria	Oxyphotobacteria	Synechococcales	Cyanobiaceae	Cyanobium PCC-6307	Ambiguous_taxa		4	0	0
ASV858	Bacteria	Cyanobacteria	Oxyphotobacteria	Synechococcales	Cyanobiaceae	Cyanobium PCC-6307	Ambiguous_taxa		11	1	0
ASV859	Bacteria	Cyanobacteria	Oxyphotobacteria	Synechococcales	Cyanobiaceae	Cyanobium PCC-6307	metagenome		2	0	0
ASV860	Bacteria	Cyanobacteria	Oxyphotobacteria	Synechococcales	Cyanobiaceae	Cyanobium PCC-6307	uncultured cyanobacterium		2	0	0
ASV861	Bacteria	Cyanobacteria	Oxyphotobacteria	Synechococcales	Cyanobiaceae	Cyanobium PCC-6307	uncultured cyanobacterium		118	36	27
ASV862	Bacteria	Cyanobacteria	Oxyphotobacteria	Synechococcales	Cyanobiaceae	Cyanobium PCC-6307			119	32	26
ASV863	Bacteria	Cyanobacteria	Oxyphotobacteria	Synechococcales	Cyanobiaceae	Cyanobium PCC-6307			24	1	1
ASV864	Bacteria	Cyanobacteria	Oxyphotobacteria	Synechococcales	Cyanobiaceae				8	0	1
ASV865	Bacteria	Cyanobacteria	Oxyphotobacteria	Synechococcales	Cyanobiaceae				47	0	0
ASV866	Bacteria	Cyanobacteria	Oxyphotobacteria	Synechococcales	Cyanobiaceae				10	0	0
ASV867	Bacteria	Cyanobacteria	Oxyphotobacteria	Synechococcales	Synechococcales Incertae Sedis	Schizothrix LEGE 07164	uncultured cyanobacterium		0	5	0
ASV868	Bacteria	Cyanobacteria	Oxyphotobacteria	Synechococcales	Synechococcales Incertae Sedis	Schizothrix LEGE 07164			1	2	0
ASV869	Bacteria	Cyanobacteria	Oxyphotobacteria						2	1	0
ASV870	Bacteria	Cyanobacteria	Oxyphotobacteria						0	0	3
ASV871	Bacteria	Cyanobacteria	Oxyphotobacteria						0	1	1
ASV872	Bacteria	Cyanobacteria	Oxyphotobacteria						0	1	1
ASV873	Bacteria	Dadabacteria	Dadabacteriia	Dadabacteriales	marine metagenome	marine metagenome	marine metagenome		1	14	29
ASV874	Bacteria	Dadabacteria	Dadabacteriia	Dadabacteriales	metagenome	metagenome	metagenome		61	3	0
ASV875	Bacteria	Dadabacteria	Dadabacteriia	Dadabacteriales	uncultured marine bacterium	uncultured marine bacterium	uncultured marine bacterium		0	1	7
ASV876	Bacteria	Dependentiae	Babeliae	Babeliales	Babeliaceae	uncultured bacterium	uncultured bacterium		4	1	0
ASV877	Bacteria	Epsilonbacteraeota	Campylobacteria	Campylobacterales	Arcobacteraceae	Arcobacter	Arcobacter sp. UDC313		3	0	0
ASV878	Bacteria	Epsilonbacteraeota	Campylobacteria	Campylobacterales	Arcobacteraceae	Arcobacter	uncultured Arcobacter sp.		1	1	0
ASV879	Bacteria	Epsilonbacteraeota	Campylobacteria	Campylobacterales	Arcobacteraceae	Arcobacter			1	1	0
ASV880	Bacteria	Epsilonbacteraeota	Campylobacteria	Campylobacterales	Arcobacteraceae	Arcobacter			0	2	0
ASV881	Bacteria	Epsilonbacteraeota	Campylobacteria	Campylobacterales	Thiovulaceae	Sulfurimonas	uncultured Sulfurimonas sp.		3	0	0
ASV882	Bacteria	Epsilonbacteraeota	Campylobacteria	Campylobacterales	Thiovulaceae	Sulfurimonas			3	0	0
ASV883	Bacteria	Epsilonbacteraeota	Campylobacteria	Campylobacterales	Thiovulaceae	Sulfurimonas			2	0	0
ASV884	Bacteria	Fibrobacteres	Fibrobacteria	Fibrobacterales	Fibrobacteraceae	uncultured	uncultured Fibrobacteres bacterium		9	0	0
ASV885	Bacteria	Firmicutes	Bacilli	Bacillales	Bacillaceae	Bacillus			3	0	1
ASV886	Bacteria	Firmicutes	Bacilli	Bacillales	Staphylococcaceae	Staphylococcus			4	1	1
ASV887	Bacteria	Firmicutes	Bacilli	Bacillales					4	0	0
ASV888	Bacteria	Firmicutes	Bacilli	Lactobacillales	Streptococcaceae	Lactococcus			2	0	2
ASV889	Bacteria	Firmicutes	Clostridia	Clostridiales	Family XII	Fusibacter	bacterium WH4-9		1	2	0
ASV890	Bacteria	Firmicutes	Clostridia	Clostridiales	Family XII	Fusibacter	uncultured bacterium		2	4	0
ASV891	Bacteria	Firmicutes	Clostridia	Clostridiales	Family XII	Fusibacter	uncultured bacterium		2	1	1
ASV892	Bacteria	Firmicutes	Clostridia	Clostridiales	Family XIII				4	1	0
ASV893	Bacteria	Firmicutes	Clostridia	Clostridiales	Lachnospiraceae	Epulopiscium	uncultured Lachnospiraceae bacterium		0	2	0
ASV894	Bacteria	Firmicutes	Clostridia	Clostridiales	Lachnospiraceae	Tyzzerella 3			2	1	0
ASV895	Bacteria	Firmicutes	Clostridia	Clostridiales	Lachnospiraceae	uncultured	uncultured Vallitalea sp.		2	0	0
ASV896	Bacteria	Firmicutes	Clostridia	Clostridiales	Lachnospiraceae				2	10	2
ASV897	Bacteria	Firmicutes	Erysipelotrichia	Erysipelotrichales	Erysipelotrichaceae	[Anaerorhabdus] furcosa group	uncultured bacterium		1	3	0
ASV898	Bacteria	Firmicutes	Erysipelotrichia	Erysipelotrichales	Erysipelotrichaceae	Erysipelatoclostridium			2	5	2
ASV899	Bacteria	Firmicutes	Erysipelotrichia	Erysipelotrichales	Erysipelotrichaceae	Erysipelatoclostridium			0	3	0
ASV900	Bacteria	Fusobacteria	Fusobacteriia	Fusobacteriales	Fusobacteriaceae	Cetobacterium	uncultured bacterium		1	2	0
ASV901	Bacteria	Fusobacteria	Fusobacteriia	Fusobacteriales	Fusobacteriaceae	Cetobacterium	uncultured bacterium		3	0	0
ASV902	Bacteria	Fusobacteria	Fusobacteriia	Fusobacteriales	Fusobacteriaceae	Cetobacterium	uncultured bacterium		0	2	0
ASV903	Bacteria	Fusobacteria	Fusobacteriia	Fusobacteriales	Fusobacteriaceae	Propionigenium	uncultured bacterium		2	2	0
ASV904	Bacteria	Fusobacteria	Fusobacteriia	Fusobacteriales	Fusobacteriaceae	Propionigenium			4	7	2
ASV905	Bacteria	Fusobacteria	Fusobacteriia	Fusobacteriales	Fusobacteriaceae	Propionigenium			2	1	0
ASV906	Bacteria	Fusobacteria	Fusobacteriia	Fusobacteriales	Fusobacteriaceae	Propionigenium			1	1	1
ASV907	Bacteria	Fusobacteria	Fusobacteriia	Fusobacteriales	Fusobacteriaceae	Propionigenium			0	2	0
ASV908	Bacteria	Gemmatimonadetes	BD2-11 terrestrial group						22	1	0
ASV909	Bacteria	Kiritimatiellaeota	Kiritimatiellae	Kiritimatiellales	Kiritimatiellaceae	R76-B128	Ambiguous_taxa		1	0	1
ASV910	Bacteria	Kiritimatiellaeota	Kiritimatiellae	Kiritimatiellales	Kiritimatiellaceae	R76-B128	Ambiguous_taxa		0	6	22
ASV911	Bacteria	Kiritimatiellaeota	Kiritimatiellae	Kiritimatiellales	Kiritimatiellaceae	R76-B128			8	2	1
ASV912	Bacteria	Kiritimatiellaeota	Kiritimatiellae	Kiritimatiellales	Kiritimatiellaceae	R76-B128			2	0	0
ASV913	Bacteria	Lentisphaerae	Lentisphaeria	Lentisphaerales	Lentisphaeraceae	Lentisphaera	Ambiguous_taxa		7	6	0
ASV914	Bacteria	Lentisphaerae	Lentisphaeria	Lentisphaerales	Lentisphaeraceae	Lentisphaera	Ambiguous_taxa		1	2	2
ASV915	Bacteria	Lentisphaerae	Lentisphaeria	Lentisphaerales	Lentisphaeraceae	Lentisphaera	Ambiguous_taxa		3	1	0
ASV916	Bacteria	Lentisphaerae	Lentisphaeria	Lentisphaerales	Lentisphaeraceae	Lentisphaera	Ambiguous_taxa		6	1	0
ASV917	Bacteria	Lentisphaerae	Lentisphaeria	Lentisphaerales	Lentisphaeraceae	Lentisphaera	uncultured bacterium		0	1	1
ASV918	Bacteria	Lentisphaerae	Lentisphaeria	Lentisphaerales	Lentisphaeraceae	Lentisphaera	uncultured bacterium		2	0	1
ASV919	Bacteria	Lentisphaerae	Lentisphaeria	Lentisphaerales	Lentisphaeraceae	Lentisphaera	uncultured bacterium		0	2	0
ASV920	Bacteria	Lentisphaerae	Lentisphaeria	Lentisphaerales	Lentisphaeraceae	Lentisphaera	uncultured bacterium		2	0	0
ASV921	Bacteria	Lentisphaerae	Lentisphaeria	Lentisphaerales	Lentisphaeraceae	Lentisphaera	uncultured bacterium		7	4	0
ASV922	Bacteria	Lentisphaerae	Lentisphaeria	Lentisphaerales	Lentisphaeraceae	Lentisphaera	uncultured bacterium		2	5	1
ASV923	Bacteria	Lentisphaerae	Lentisphaeria	Lentisphaerales	Lentisphaeraceae	Lentisphaera	uncultured bacterium		1	0	1
ASV924	Bacteria	Lentisphaerae	Lentisphaeria	Lentisphaerales	Lentisphaeraceae	Lentisphaera	uncultured bacterium		1	2	0
ASV925	Bacteria	Lentisphaerae	Lentisphaeria	Lentisphaerales	Lentisphaeraceae	Lentisphaera	uncultured bacterium		0	2	0
ASV926	Bacteria	Lentisphaerae	Lentisphaeria	Lentisphaerales	Lentisphaeraceae	Lentisphaera	uncultured Lentisphaerae bacterium		1	5	0
ASV927	Bacteria	Lentisphaerae	Lentisphaeria	Lentisphaerales	Lentisphaeraceae	Lentisphaera	uncultured Lentisphaerae bacterium		0	1	1
ASV928	Bacteria	Lentisphaerae	Lentisphaeria	Lentisphaerales	Lentisphaeraceae	Lentisphaera	uncultured Lentisphaerae bacterium		0	2	0
ASV929	Bacteria	Lentisphaerae	Lentisphaeria	Lentisphaerales	Lentisphaeraceae	Lentisphaera	uncultured marine bacterium		4	0	0
ASV930	Bacteria	Lentisphaerae	Lentisphaeria	Lentisphaerales	Lentisphaeraceae	Lentisphaera			0	2	0
ASV931	Bacteria	Lentisphaerae	Oligosphaeria	P.palmC41	marine bacterium r52	marine bacterium r52	marine bacterium r52		5	1	1
ASV932	Bacteria	Margulisbacteria	metagenome	metagenome	metagenome	metagenome	metagenome		2	1	2
ASV933	Bacteria	Margulisbacteria	metagenome	metagenome	metagenome	metagenome	metagenome		1	1	0
ASV934	Bacteria	Margulisbacteria	metagenome	metagenome	metagenome	metagenome	metagenome		14	1	1
ASV935	Bacteria	Margulisbacteria	metagenome	metagenome	metagenome	metagenome	metagenome		0	0	4
ASV936	Bacteria	Margulisbacteria	metagenome	metagenome	metagenome	metagenome	metagenome		9	1	0
ASV937	Bacteria	Margulisbacteria	metagenome	metagenome	metagenome	metagenome	metagenome		10	0	0
ASV938	Bacteria	Margulisbacteria	metagenome	metagenome	metagenome	metagenome	metagenome		2	0	0
ASV939	Bacteria	Margulisbacteria	metagenome	metagenome	metagenome	metagenome	metagenome		0	0	4
ASV940	Bacteria	Margulisbacteria	metagenome	metagenome	metagenome	metagenome	metagenome		0	1	1
ASV941	Bacteria	Margulisbacteria	metagenome	metagenome	metagenome	metagenome	metagenome		6	0	0
ASV942	Bacteria	Margulisbacteria	metagenome	metagenome	metagenome	metagenome	metagenome		24	1	0
ASV943	Bacteria	Margulisbacteria	uncultured bacterium	uncultured bacterium	uncultured bacterium	uncultured bacterium	uncultured bacterium		11	0	0
ASV944	Bacteria	Margulisbacteria	uncultured bacterium	uncultured bacterium	uncultured bacterium	uncultured bacterium	uncultured bacterium		0	0	3
ASV945	Bacteria	Margulisbacteria	uncultured bacterium	uncultured bacterium	uncultured bacterium	uncultured bacterium	uncultured bacterium		7	0	0
ASV946	Bacteria	Margulisbacteria	uncultured bacterium	uncultured bacterium	uncultured bacterium	uncultured bacterium	uncultured bacterium		0	0	2
ASV947	Bacteria	Margulisbacteria	uncultured bacterium	uncultured bacterium	uncultured bacterium	uncultured bacterium	uncultured bacterium		1	1	0
ASV948	Bacteria	Margulisbacteria	uncultured bacterium	uncultured bacterium	uncultured bacterium	uncultured bacterium	uncultured bacterium		5	1	0
ASV949	Bacteria	Margulisbacteria	uncultured bacterium	uncultured bacterium	uncultured bacterium	uncultured bacterium	uncultured bacterium		15	3	1
ASV950	Bacteria	Margulisbacteria	uncultured bacterium	uncultured bacterium	uncultured bacterium	uncultured bacterium	uncultured bacterium		0	0	2
ASV951	Bacteria	Margulisbacteria	uncultured bacterium	uncultured bacterium	uncultured bacterium	uncultured bacterium	uncultured bacterium		6	0	0
ASV952	Bacteria	Margulisbacteria	uncultured bacterium	uncultured bacterium	uncultured bacterium	uncultured bacterium	uncultured bacterium		2	1	3
ASV953	Bacteria	Margulisbacteria	uncultured bacterium	uncultured bacterium	uncultured bacterium	uncultured bacterium	uncultured bacterium		5	0	0
ASV954	Bacteria	Margulisbacteria	uncultured marine bacterium	uncultured marine bacterium	uncultured marine bacterium	uncultured marine bacterium	uncultured marine bacterium		8	2	1
ASV955	Bacteria	Margulisbacteria	uncultured marine bacterium	uncultured marine bacterium	uncultured marine bacterium	uncultured marine bacterium	uncultured marine bacterium		7	0	0
ASV956	Bacteria	Margulisbacteria	uncultured marine cyanobacterium	uncultured marine cyanobacterium	uncultured marine cyanobacterium	uncultured marine cyanobacterium	uncultured marine cyanobacterium		6	0	0
ASV957	Bacteria	Margulisbacteria							21	0	1
ASV958	Bacteria	Margulisbacteria							3	0	0
ASV959	Bacteria	Margulisbacteria							1	0	1
ASV960	Bacteria	Margulisbacteria							3	1	0
ASV961	Bacteria	Margulisbacteria							7	5	2
ASV962	Bacteria	Margulisbacteria							9	2	0
ASV963	Bacteria	Margulisbacteria							4	0	0
ASV964	Bacteria	Margulisbacteria							3	1	0
ASV965	Bacteria	Marinimicrobia (SAR406 clade)	Ambiguous_taxa	Ambiguous_taxa	Ambiguous_taxa	Ambiguous_taxa	Ambiguous_taxa		0	1	3
ASV966	Bacteria	Marinimicrobia (SAR406 clade)	Ambiguous_taxa	Ambiguous_taxa	Ambiguous_taxa	Ambiguous_taxa	Ambiguous_taxa		0	0	2
ASV967	Bacteria	Marinimicrobia (SAR406 clade)	Ambiguous_taxa	Ambiguous_taxa	Ambiguous_taxa	Ambiguous_taxa	Ambiguous_taxa		0	1	4
ASV968	Bacteria	Marinimicrobia (SAR406 clade)	Ambiguous_taxa	Ambiguous_taxa	Ambiguous_taxa	Ambiguous_taxa	Ambiguous_taxa		0	0	2
ASV969	Bacteria	Marinimicrobia (SAR406 clade)	Ambiguous_taxa	Ambiguous_taxa	Ambiguous_taxa	Ambiguous_taxa	Ambiguous_taxa		0	0	3
ASV970	Bacteria	Marinimicrobia (SAR406 clade)	Ambiguous_taxa	Ambiguous_taxa	Ambiguous_taxa	Ambiguous_taxa	Ambiguous_taxa		0	0	3
ASV971	Bacteria	Marinimicrobia (SAR406 clade)	Ambiguous_taxa	Ambiguous_taxa	Ambiguous_taxa	Ambiguous_taxa	Ambiguous_taxa		0	2	3
ASV972	Bacteria	Marinimicrobia (SAR406 clade)	Ambiguous_taxa	Ambiguous_taxa	Ambiguous_taxa	Ambiguous_taxa	Ambiguous_taxa		0	0	2
ASV973	Bacteria	Marinimicrobia (SAR406 clade)	Ambiguous_taxa	Ambiguous_taxa	Ambiguous_taxa	Ambiguous_taxa	Ambiguous_taxa		0	2	2
ASV974	Bacteria	Marinimicrobia (SAR406 clade)	Ambiguous_taxa	Ambiguous_taxa	Ambiguous_taxa	Ambiguous_taxa	Ambiguous_taxa		0	0	4
ASV975	Bacteria	Marinimicrobia (SAR406 clade)	Alteromonas macleodii	Alteromonas macleodii	Alteromonas macleodii	Alteromonas macleodii	Alteromonas macleodii		84	14	3
ASV976	Bacteria	Marinimicrobia (SAR406 clade)	Alteromonas macleodii	Alteromonas macleodii	Alteromonas macleodii	Alteromonas macleodii	Alteromonas macleodii		13	2	1
ASV977	Bacteria	Marinimicrobia (SAR406 clade)	Alteromonas macleodii	Alteromonas macleodii	Alteromonas macleodii	Alteromonas macleodii	Alteromonas macleodii		77	14	3
ASV978	Bacteria	Marinimicrobia (SAR406 clade)	Marinimicrobia bacterium JGI 0000113-D11	Marinimicrobia bacterium JGI 0000113-D11	Marinimicrobia bacterium JGI 0000113-D11	Marinimicrobia bacterium JGI 0000113-D11	Marinimicrobia bacterium JGI 0000113-D11		1	0	1
ASV979	Bacteria	Marinimicrobia (SAR406 clade)	Marinimicrobia bacterium JGI 0000113-D11	Marinimicrobia bacterium JGI 0000113-D11	Marinimicrobia bacterium JGI 0000113-D11	Marinimicrobia bacterium JGI 0000113-D11	Marinimicrobia bacterium JGI 0000113-D11		0	0	2
ASV980	Bacteria	Marinimicrobia (SAR406 clade)	Marinimicrobia bacterium JGI 0000113-D11	Marinimicrobia bacterium JGI 0000113-D11	Marinimicrobia bacterium JGI 0000113-D11	Marinimicrobia bacterium JGI 0000113-D11	Marinimicrobia bacterium JGI 0000113-D11		0	1	1
ASV981	Bacteria	Marinimicrobia (SAR406 clade)	Marinimicrobia bacterium JGI 0000113-D11	Marinimicrobia bacterium JGI 0000113-D11	Marinimicrobia bacterium JGI 0000113-D11	Marinimicrobia bacterium JGI 0000113-D11	Marinimicrobia bacterium JGI 0000113-D11		0	1	3
ASV982	Bacteria	Marinimicrobia (SAR406 clade)	Marinimicrobia bacterium JGI 0000113-D11	Marinimicrobia bacterium JGI 0000113-D11	Marinimicrobia bacterium JGI 0000113-D11	Marinimicrobia bacterium JGI 0000113-D11	Marinimicrobia bacterium JGI 0000113-D11		0	1	2
ASV983	Bacteria	Marinimicrobia (SAR406 clade)	Marinimicrobia bacterium JGI 0000113-D11	Marinimicrobia bacterium JGI 0000113-D11	Marinimicrobia bacterium JGI 0000113-D11	Marinimicrobia bacterium JGI 0000113-D11	Marinimicrobia bacterium JGI 0000113-D11		0	2	2
ASV984	Bacteria	Marinimicrobia (SAR406 clade)	Marinimicrobia bacterium JGI 0000113-D11	Marinimicrobia bacterium JGI 0000113-D11	Marinimicrobia bacterium JGI 0000113-D11	Marinimicrobia bacterium JGI 0000113-D11	Marinimicrobia bacterium JGI 0000113-D11		0	1	12
ASV985	Bacteria	Marinimicrobia (SAR406 clade)	metagenome	metagenome	metagenome	metagenome	metagenome		0	2	6
ASV986	Bacteria	Marinimicrobia (SAR406 clade)	metagenome	metagenome	metagenome	metagenome	metagenome		0	0	3
ASV987	Bacteria	Marinimicrobia (SAR406 clade)	metagenome	metagenome	metagenome	metagenome	metagenome		1	1	6
ASV988	Bacteria	Marinimicrobia (SAR406 clade)	uncultured bacterium	uncultured bacterium	uncultured bacterium	uncultured bacterium	uncultured bacterium		0	3	3
ASV989	Bacteria	Marinimicrobia (SAR406 clade)	uncultured bacterium	uncultured bacterium	uncultured bacterium	uncultured bacterium	uncultured bacterium		0	1	1
ASV990	Bacteria	Marinimicrobia (SAR406 clade)	uncultured bacterium	uncultured bacterium	uncultured bacterium	uncultured bacterium	uncultured bacterium		0	0	2
ASV991	Bacteria	Marinimicrobia (SAR406 clade)	uncultured bacterium	uncultured bacterium	uncultured bacterium	uncultured bacterium	uncultured bacterium		0	1	8
ASV992	Bacteria	Marinimicrobia (SAR406 clade)	uncultured bacterium FPPU_33B15	uncultured bacterium FPPU_33B15	uncultured bacterium FPPU_33B15	uncultured bacterium FPPU_33B15	uncultured bacterium FPPU_33B15		0	0	3
ASV993	Bacteria	Marinimicrobia (SAR406 clade)	uncultured Candidatus Marinimicrobia bacterium	uncultured Candidatus Marinimicrobia bacterium	uncultured Candidatus Marinimicrobia bacterium	uncultured Candidatus Marinimicrobia bacterium	uncultured Candidatus Marinimicrobia bacterium		0	3	3
ASV994	Bacteria	Marinimicrobia (SAR406 clade)	uncultured marine bacterium	uncultured marine bacterium	uncultured marine bacterium	uncultured marine bacterium	uncultured marine bacterium		0	1	1
ASV995	Bacteria	Marinimicrobia (SAR406 clade)	uncultured marine microorganism	uncultured marine microorganism	uncultured marine microorganism	uncultured marine microorganism	uncultured marine microorganism		1	2	5
ASV996	Bacteria	Marinimicrobia (SAR406 clade)	unidentified marine bacterioplankton	unidentified marine bacterioplankton	unidentified marine bacterioplankton	unidentified marine bacterioplankton	unidentified marine bacterioplankton		13	5	7
ASV997	Bacteria	Marinimicrobia (SAR406 clade)	unidentified marine bacterioplankton	unidentified marine bacterioplankton	unidentified marine bacterioplankton	unidentified marine bacterioplankton	unidentified marine bacterioplankton		1	0	1
ASV998	Bacteria	Marinimicrobia (SAR406 clade)	unidentified marine bacterioplankton	unidentified marine bacterioplankton	unidentified marine bacterioplankton	unidentified marine bacterioplankton	unidentified marine bacterioplankton		0	0	2
ASV999	Bacteria	Marinimicrobia (SAR406 clade)	unidentified marine bacterioplankton	unidentified marine bacterioplankton	unidentified marine bacterioplankton	unidentified marine bacterioplankton	unidentified marine bacterioplankton		0	1	5
ASV1000	Bacteria	Marinimicrobia (SAR406 clade)	unidentified marine bacterioplankton	unidentified marine bacterioplankton	unidentified marine bacterioplankton	unidentified marine bacterioplankton	unidentified marine bacterioplankton		1	0	1
ASV1001	Bacteria	Marinimicrobia (SAR406 clade)	unidentified marine bacterioplankton	unidentified marine bacterioplankton	unidentified marine bacterioplankton	unidentified marine bacterioplankton	unidentified marine bacterioplankton		31	2	1
ASV1002	Bacteria	Marinimicrobia (SAR406 clade)	unidentified marine bacterioplankton	unidentified marine bacterioplankton	unidentified marine bacterioplankton	unidentified marine bacterioplankton	unidentified marine bacterioplankton		0	1	2
ASV1003	Bacteria	Marinimicrobia (SAR406 clade)	unidentified marine bacterioplankton	unidentified marine bacterioplankton	unidentified marine bacterioplankton	unidentified marine bacterioplankton	unidentified marine bacterioplankton		0	0	5
ASV1004	Bacteria	Marinimicrobia (SAR406 clade)							0	1	4
ASV1005	Bacteria	Marinimicrobia (SAR406 clade)							0	1	5
ASV1006	Bacteria	Marinimicrobia (SAR406 clade)							0	9	28
ASV1007	Bacteria	Marinimicrobia (SAR406 clade)							4	0	0
ASV1008	Bacteria	Marinimicrobia (SAR406 clade)							0	0	2
ASV1009	Bacteria	Marinimicrobia (SAR406 clade)							0	0	2
ASV1010	Bacteria	Marinimicrobia (SAR406 clade)							0	0	3
ASV1011	Bacteria	Marinimicrobia (SAR406 clade)							0	1	4
ASV1012	Bacteria	Marinimicrobia (SAR406 clade)							0	0	7
ASV1013	Bacteria	Marinimicrobia (SAR406 clade)							0	0	2
ASV1014	Bacteria	Marinimicrobia (SAR406 clade)							1	0	2
ASV1015	Bacteria	Marinimicrobia (SAR406 clade)							0	3	6
ASV1016	Bacteria	Marinimicrobia (SAR406 clade)							2	4	8
ASV1017	Bacteria	Marinimicrobia (SAR406 clade)							0	0	2
ASV1018	Bacteria	Marinimicrobia (SAR406 clade)							43	8	19
ASV1019	Bacteria	Nitrospirae	Thermodesulfovibrionia	uncultured					2	0	0
ASV1020	Bacteria	Patescibacteria	Gracilibacteria	Candidatus Peregrinibacteria	uncultured bacterium	uncultured bacterium	uncultured bacterium		17	2	0
ASV1021	Bacteria	Patescibacteria	Gracilibacteria	Candidatus Peregrinibacteria	uncultured bacterium	uncultured bacterium	uncultured bacterium		2	0	0
ASV1022	Bacteria	Patescibacteria	Gracilibacteria	Candidatus Peregrinibacteria	uncultured bacterium	uncultured bacterium	uncultured bacterium		12	2	0
ASV1023	Bacteria	Patescibacteria	Gracilibacteria	Candidatus Peregrinibacteria	uncultured bacterium	uncultured bacterium	uncultured bacterium		17	0	0
ASV1024	Bacteria	Patescibacteria	Gracilibacteria	Candidatus Peregrinibacteria	uncultured bacterium	uncultured bacterium	uncultured bacterium		7	0	1
ASV1025	Bacteria	PAUC34f	uncultured marine bacterium	uncultured marine bacterium	uncultured marine bacterium	uncultured marine bacterium	uncultured marine bacterium		0	1	6
ASV1026	Bacteria	PAUC34f	uncultured marine bacterium	uncultured marine bacterium	uncultured marine bacterium	uncultured marine bacterium	uncultured marine bacterium		25	3	0
ASV1027	Bacteria	Planctomycetes	BD7-11	uncultured bacterium	uncultured bacterium	uncultured bacterium	uncultured bacterium		2	0	0
ASV1028	Bacteria	Planctomycetes	BD7-11	uncultured marine bacterium	uncultured marine bacterium	uncultured marine bacterium	uncultured marine bacterium		2	0	0
ASV1029	Bacteria	Planctomycetes	BD7-11	uncultured marine bacterium	uncultured marine bacterium	uncultured marine bacterium	uncultured marine bacterium		4	0	0
ASV1030	Bacteria	Planctomycetes	BD7-11						11	0	0
ASV1031	Bacteria	Planctomycetes	BD7-11						2	0	0
ASV1032	Bacteria	Planctomycetes	BD7-11						1	3	0
ASV1033	Bacteria	Planctomycetes	OM190	Ambiguous_taxa	Ambiguous_taxa	Ambiguous_taxa	Ambiguous_taxa		14	1	0
ASV1034	Bacteria	Planctomycetes	OM190	Ambiguous_taxa	Ambiguous_taxa	Ambiguous_taxa	Ambiguous_taxa		4	1	0
ASV1035	Bacteria	Planctomycetes	OM190	Ambiguous_taxa	Ambiguous_taxa	Ambiguous_taxa	Ambiguous_taxa		90	11	4
ASV1036	Bacteria	Planctomycetes	OM190	Ambiguous_taxa	Ambiguous_taxa	Ambiguous_taxa	Ambiguous_taxa		104	15	5
ASV1037	Bacteria	Planctomycetes	OM190	Ambiguous_taxa	Ambiguous_taxa	Ambiguous_taxa	Ambiguous_taxa		31	2	1
ASV1038	Bacteria	Planctomycetes	OM190	marine metagenome	marine metagenome	marine metagenome	marine metagenome		8	1	0
ASV1039	Bacteria	Planctomycetes	OM190	uncultured bacterium	uncultured bacterium	uncultured bacterium	uncultured bacterium		0	1	1
ASV1040	Bacteria	Planctomycetes	OM190	uncultured marine bacterium	uncultured marine bacterium	uncultured marine bacterium	uncultured marine bacterium		85	8	5
ASV1041	Bacteria	Planctomycetes	OM190	uncultured Planctomycetaceae bacterium	uncultured Planctomycetaceae bacterium	uncultured Planctomycetaceae bacterium	uncultured Planctomycetaceae bacterium		4	0	0
ASV1042	Bacteria	Planctomycetes	OM190	uncultured Planctomycetaceae bacterium	uncultured Planctomycetaceae bacterium	uncultured Planctomycetaceae bacterium	uncultured Planctomycetaceae bacterium		6	1	0
ASV1043	Bacteria	Planctomycetes	OM190	uncultured Planctomycetales bacterium	uncultured Planctomycetales bacterium	uncultured Planctomycetales bacterium	uncultured Planctomycetales bacterium		21	3	0
ASV1044	Bacteria	Planctomycetes	Phycisphaerae	Phycisphaerales	Phycisphaeraceae	Urania-1B-19 marine sediment group	Ambiguous_taxa		76	19	24
ASV1045	Bacteria	Planctomycetes	Phycisphaerae	Phycisphaerales	Phycisphaeraceae	Urania-1B-19 marine sediment group			3	1	0
ASV1046	Bacteria	Planctomycetes	Pla3 lineage	Ambiguous_taxa	Ambiguous_taxa	Ambiguous_taxa	Ambiguous_taxa		2	0	0
ASV1047	Bacteria	Planctomycetes	Pla3 lineage	Ambiguous_taxa	Ambiguous_taxa	Ambiguous_taxa	Ambiguous_taxa		116	23	8
ASV1048	Bacteria	Planctomycetes	Planctomycetacia	Pirellulales	Pirellulaceae	Blastopirellula	uncultured bacterium		0	1	1
ASV1049	Bacteria	Planctomycetes	Planctomycetacia	Pirellulales	Pirellulaceae	Blastopirellula	uncultured bacterium		4	1	1
ASV1050	Bacteria	Planctomycetes	Planctomycetacia	Pirellulales	Pirellulaceae	Blastopirellula	uncultured planctomycete		4	1	0
ASV1051	Bacteria	Planctomycetes	Planctomycetacia	Pirellulales	Pirellulaceae	Blastopirellula			0	2	0
ASV1052	Bacteria	Planctomycetes	Planctomycetacia	Pirellulales	Pirellulaceae	Blastopirellula			74	9	2
ASV1053	Bacteria	Planctomycetes	Planctomycetacia	Pirellulales	Pirellulaceae	Blastopirellula			31	4	3
ASV1054	Bacteria	Planctomycetes	Planctomycetacia	Pirellulales	Pirellulaceae	Blastopirellula			0	1	1
ASV1055	Bacteria	Planctomycetes	Planctomycetacia	Pirellulales	Pirellulaceae	Pir4 lineage			0	4	0
ASV1056	Bacteria	Planctomycetes	Planctomycetacia	Pirellulales	Pirellulaceae	Pirellula	uncultured organism		1	1	0
ASV1057	Bacteria	Planctomycetes	Planctomycetacia	Pirellulales	Pirellulaceae	Pirellula	uncultured Planctomycetales bacterium		45	5	1
ASV1058	Bacteria	Planctomycetes	Planctomycetacia	Pirellulales	Pirellulaceae	Pirellula			52	6	17
ASV1059	Bacteria	Planctomycetes	Planctomycetacia	Pirellulales	Pirellulaceae	Rhodopirellula	marine metagenome		48	11	19
ASV1060	Bacteria	Planctomycetes	Planctomycetacia	Pirellulales	Pirellulaceae	Rhodopirellula	unidentified marine bacterioplankton		6	0	0
ASV1061	Bacteria	Planctomycetes	Planctomycetacia	Pirellulales	Pirellulaceae	Rubripirellula	uncultured bacterium		1	1	0
ASV1062	Bacteria	Planctomycetes	Planctomycetacia	Pirellulales	Pirellulaceae	Rubripirellula	uncultured bacterium		1	1	1
ASV1063	Bacteria	Planctomycetes	Planctomycetacia	Pirellulales	Pirellulaceae	Rubripirellula			80	11	11
ASV1064	Bacteria	Planctomycetes	Planctomycetacia	Pirellulales	Pirellulaceae	Rubripirellula			59	10	2
ASV1065	Bacteria	Planctomycetes	Planctomycetacia	Pirellulales	Pirellulaceae	uncultured	uncultured planctomycete		0	2	4
ASV1066	Bacteria	Planctomycetes	Planctomycetacia	Pirellulales	Pirellulaceae	uncultured			1	1	2
ASV1067	Bacteria	Planctomycetes	Planctomycetacia	Planctomycetales	Gimesiaceae	uncultured	uncultured bacterium		1	1	0
ASV1068	Bacteria	Planctomycetes	Planctomycetacia	Planctomycetales	Gimesiaceae	uncultured	uncultured bacterium		1	1	1
ASV1069	Bacteria	Planctomycetes	Planctomycetacia	Planctomycetales	Rubinisphaeraceae	Fuerstia	uncultured Planctomyces sp.		1	1	0
ASV1070	Bacteria	Planctomycetes	Planctomycetacia	Planctomycetales	Rubinisphaeraceae	uncultured	uncultured Planctomycetaceae bacterium		21	2	0
ASV1071	Bacteria	Planctomycetes	Planctomycetacia	Planctomycetales	Rubinisphaeraceae	uncultured	uncultured Planctomycetia bacterium		4	0	0
ASV1072	Bacteria	Planctomycetes	Planctomycetacia	Planctomycetales	uncultured	uncultured bacterium	uncultured bacterium		2	0	0
ASV1073	Bacteria	Planctomycetes	vadinHA49	uncultured bacterium	uncultured bacterium	uncultured bacterium	uncultured bacterium		0	1	1
ASV1074	Bacteria	Planctomycetes	vadinHA49	uncultured bacterium	uncultured bacterium	uncultured bacterium	uncultured bacterium		0	2	0
ASV1075	Bacteria	Proteobacteria	Alphaproteobacteria	Caulobacterales	Hyphomonadaceae	Euryhalocaulis	uncultured bacterium		3	1	0
ASV1076	Bacteria	Proteobacteria	Alphaproteobacteria	Caulobacterales	Hyphomonadaceae	Maricaulis	Ambiguous_taxa		4	0	0
ASV1077	Bacteria	Proteobacteria	Alphaproteobacteria	Caulobacterales	Hyphomonadaceae	uncultured	Ambiguous_taxa		61	6	3
ASV1078	Bacteria	Proteobacteria	Alphaproteobacteria	Caulobacterales	Hyphomonadaceae	uncultured	Ambiguous_taxa		1	1	0
ASV1079	Bacteria	Proteobacteria	Alphaproteobacteria	Caulobacterales	Hyphomonadaceae	uncultured	uncultured bacterium		1	2	0
ASV1080	Bacteria	Proteobacteria	Alphaproteobacteria	Caulobacterales	Hyphomonadaceae	uncultured			3	0	0
ASV1081	Bacteria	Proteobacteria	Alphaproteobacteria	Caulobacterales	Hyphomonadaceae				1	1	0
ASV1082	Bacteria	Proteobacteria	Alphaproteobacteria	Caulobacterales	Hyphomonadaceae				4	4	2
ASV1083	Bacteria	Proteobacteria	Alphaproteobacteria	Holosporales	Holosporaceae	uncultured	Melita plumulosa		1	4	2
ASV1084	Bacteria	Proteobacteria	Alphaproteobacteria	Holosporales	Holosporaceae	uncultured	uncultured alpha proteobacterium		2	0	1
ASV1085	Bacteria	Proteobacteria	Alphaproteobacteria	Holosporales	Holosporaceae	uncultured	uncultured alpha proteobacterium		1	1	1
ASV1086	Bacteria	Proteobacteria	Alphaproteobacteria	Holosporales	Holosporaceae	uncultured	uncultured alpha proteobacterium		1	4	2
ASV1087	Bacteria	Proteobacteria	Alphaproteobacteria	Holosporales	Holosporaceae	uncultured			5	0	0
ASV1088	Bacteria	Proteobacteria	Alphaproteobacteria	Micavibrionales	Micavibrionaceae	uncultured	unidentified marine bacterioplankton		1	1	0
ASV1089	Bacteria	Proteobacteria	Alphaproteobacteria	Micavibrionales	uncultured	uncultured bacterium	uncultured bacterium		1	0	1
ASV1090	Bacteria	Proteobacteria	Alphaproteobacteria	Micavibrionales	uncultured	uncultured bacterium	uncultured bacterium		3	0	0
ASV1091	Bacteria	Proteobacteria	Alphaproteobacteria	Parvibaculales	OCS116 clade	uncultured bacterium	uncultured bacterium		0	1	1
ASV1092	Bacteria	Proteobacteria	Alphaproteobacteria	Parvibaculales	OCS116 clade				0	1	2
ASV1093	Bacteria	Proteobacteria	Alphaproteobacteria	Parvibaculales	OCS116 clade				5	8	24
ASV1094	Bacteria	Proteobacteria	Alphaproteobacteria	Parvibaculales	OCS116 clade				6	11	25
ASV1095	Bacteria	Proteobacteria	Alphaproteobacteria	Parvibaculales	OCS116 clade				2	3	7
ASV1096	Bacteria	Proteobacteria	Alphaproteobacteria	Parvibaculales	Parvibaculaceae	uncultured	Ambiguous_taxa		76	5	1
ASV1097	Bacteria	Proteobacteria	Alphaproteobacteria	Parvibaculales	Parvibaculaceae	uncultured	Ambiguous_taxa		1	10	23
ASV1098	Bacteria	Proteobacteria	Alphaproteobacteria	Parvibaculales	PS1 clade	Ambiguous_taxa	Ambiguous_taxa		87	37	23
ASV1099	Bacteria	Proteobacteria	Alphaproteobacteria	Parvibaculales	PS1 clade	Ambiguous_taxa	Ambiguous_taxa		12	11	4
ASV1100	Bacteria	Proteobacteria	Alphaproteobacteria	Parvibaculales	PS1 clade	Ambiguous_taxa	Ambiguous_taxa		13	18	4
ASV1101	Bacteria	Proteobacteria	Alphaproteobacteria	Parvibaculales	PS1 clade	Ambiguous_taxa	Ambiguous_taxa		0	4	9
ASV1102	Bacteria	Proteobacteria	Alphaproteobacteria	Parvibaculales	PS1 clade	uncultured alpha proteobacterium	uncultured alpha proteobacterium		39	15	4
ASV1103	Bacteria	Proteobacteria	Alphaproteobacteria	Parvibaculales	PS1 clade	uncultured bacterium	uncultured bacterium		0	2	1
ASV1104	Bacteria	Proteobacteria	Alphaproteobacteria	Parvibaculales	PS1 clade	uncultured marine bacterium	uncultured marine bacterium		0	0	3
ASV1105	Bacteria	Proteobacteria	Alphaproteobacteria	Parvibaculales	PS1 clade				2	0	0
ASV1106	Bacteria	Proteobacteria	Alphaproteobacteria	Parvibaculales	PS1 clade				17	22	6
ASV1107	Bacteria	Proteobacteria	Alphaproteobacteria	Parvibaculales	PS1 clade				0	0	9
ASV1108	Bacteria	Proteobacteria	Alphaproteobacteria	Parvibaculales	PS1 clade				3	0	0
ASV1109	Bacteria	Proteobacteria	Alphaproteobacteria	Parvibaculales	PS1 clade				10	5	8
ASV1110	Bacteria	Proteobacteria	Alphaproteobacteria	Parvibaculales	PS1 clade				3	2	0
ASV1111	Bacteria	Proteobacteria	Alphaproteobacteria	Puniceispirillales	SAR116 clade	Ambiguous_taxa	Ambiguous_taxa		2	1	6
ASV1112	Bacteria	Proteobacteria	Alphaproteobacteria	Puniceispirillales	SAR116 clade	Ambiguous_taxa	Ambiguous_taxa		2	18	34
ASV1113	Bacteria	Proteobacteria	Alphaproteobacteria	Puniceispirillales	SAR116 clade	Ambiguous_taxa	Ambiguous_taxa		22	34	17
ASV1114	Bacteria	Proteobacteria	Alphaproteobacteria	Puniceispirillales	SAR116 clade	Ambiguous_taxa	Ambiguous_taxa		115	40	36
ASV1115	Bacteria	Proteobacteria	Alphaproteobacteria	Puniceispirillales	SAR116 clade	alpha proteobacterium SCGC AAA015-N04	alpha proteobacterium SCGC AAA015-N04		2	6	24
ASV1116	Bacteria	Proteobacteria	Alphaproteobacteria	Puniceispirillales	SAR116 clade	alpha proteobacterium SCGC AAA015-N04	alpha proteobacterium SCGC AAA015-N04		5	10	26
ASV1117	Bacteria	Proteobacteria	Alphaproteobacteria	Puniceispirillales	SAR116 clade	Candidatus Puniceispirillum	Ambiguous_taxa		3	0	0
ASV1118	Bacteria	Proteobacteria	Alphaproteobacteria	Puniceispirillales	SAR116 clade	Candidatus Puniceispirillum	Ambiguous_taxa		2	1	5
ASV1119	Bacteria	Proteobacteria	Alphaproteobacteria	Puniceispirillales	SAR116 clade	Candidatus Puniceispirillum	Ambiguous_taxa		0	0	3
ASV1120	Bacteria	Proteobacteria	Alphaproteobacteria	Puniceispirillales	SAR116 clade	Candidatus Puniceispirillum	Ambiguous_taxa		0	0	3
ASV1121	Bacteria	Proteobacteria	Alphaproteobacteria	Puniceispirillales	SAR116 clade	Candidatus Puniceispirillum	uncultured bacterium		9	8	2
ASV1122	Bacteria	Proteobacteria	Alphaproteobacteria	Puniceispirillales	SAR116 clade	Candidatus Puniceispirillum	uncultured bacterium		0	1	4
ASV1123	Bacteria	Proteobacteria	Alphaproteobacteria	Puniceispirillales	SAR116 clade	Candidatus Puniceispirillum	uncultured bacterium		0	0	2
ASV1124	Bacteria	Proteobacteria	Alphaproteobacteria	Puniceispirillales	SAR116 clade	Candidatus Puniceispirillum	uncultured bacterium		0	0	3
ASV1125	Bacteria	Proteobacteria	Alphaproteobacteria	Puniceispirillales	SAR116 clade	Candidatus Puniceispirillum	uncultured bacterium		41	37	26
ASV1126	Bacteria	Proteobacteria	Alphaproteobacteria	Puniceispirillales	SAR116 clade	Candidatus Puniceispirillum			90	2	2
ASV1127	Bacteria	Proteobacteria	Alphaproteobacteria	Puniceispirillales	SAR116 clade	Candidatus Puniceispirillum			3	0	0
ASV1128	Bacteria	Proteobacteria	Alphaproteobacteria	Puniceispirillales	SAR116 clade	marine metagenome	marine metagenome		116	38	40
ASV1129	Bacteria	Proteobacteria	Alphaproteobacteria	Puniceispirillales	SAR116 clade	marine metagenome	marine metagenome		2	0	0
ASV1130	Bacteria	Proteobacteria	Alphaproteobacteria	Puniceispirillales	SAR116 clade	marine metagenome	marine metagenome		3	0	0
ASV1131	Bacteria	Proteobacteria	Alphaproteobacteria	Puniceispirillales	SAR116 clade	SAR116 cluster bacterium REDSEA-S10_B10N8	SAR116 cluster bacterium REDSEA-S10_B10N8		118	40	39
ASV1132	Bacteria	Proteobacteria	Alphaproteobacteria	Puniceispirillales	SAR116 clade	uncultured alpha proteobacterium	uncultured alpha proteobacterium		1	5	2
ASV1133	Bacteria	Proteobacteria	Alphaproteobacteria	Puniceispirillales	SAR116 clade	uncultured alpha proteobacterium	uncultured alpha proteobacterium		5	8	6
ASV1134	Bacteria	Proteobacteria	Alphaproteobacteria	Puniceispirillales	SAR116 clade	uncultured alpha proteobacterium	uncultured alpha proteobacterium		50	34	15
ASV1135	Bacteria	Proteobacteria	Alphaproteobacteria	Puniceispirillales	SAR116 clade	uncultured alpha proteobacterium	uncultured alpha proteobacterium		10	1	0
ASV1136	Bacteria	Proteobacteria	Alphaproteobacteria	Puniceispirillales	SAR116 clade	uncultured alpha proteobacterium	uncultured alpha proteobacterium		11	14	4
ASV1137	Bacteria	Proteobacteria	Alphaproteobacteria	Puniceispirillales	SAR116 clade	uncultured alpha proteobacterium	uncultured alpha proteobacterium		35	20	15
ASV1138	Bacteria	Proteobacteria	Alphaproteobacteria	Puniceispirillales	SAR116 clade	uncultured bacterium	uncultured bacterium		8	0	0
ASV1139	Bacteria	Proteobacteria	Alphaproteobacteria	Puniceispirillales	SAR116 clade	uncultured bacterium	uncultured bacterium		0	0	3
ASV1140	Bacteria	Proteobacteria	Alphaproteobacteria	Puniceispirillales	SAR116 clade	uncultured bacterium	uncultured bacterium		0	0	5
ASV1141	Bacteria	Proteobacteria	Alphaproteobacteria	Puniceispirillales	SAR116 clade	uncultured marine microorganism	uncultured marine microorganism		100	40	29
ASV1142	Bacteria	Proteobacteria	Alphaproteobacteria	Puniceispirillales	SAR116 clade	uncultured marine microorganism	uncultured marine microorganism		5	3	3
ASV1143	Bacteria	Proteobacteria	Alphaproteobacteria	Puniceispirillales	SAR116 clade	uncultured marine microorganism	uncultured marine microorganism		78	38	28
ASV1144	Bacteria	Proteobacteria	Alphaproteobacteria	Puniceispirillales	SAR116 clade	uncultured marine microorganism	uncultured marine microorganism		2	4	0
ASV1145	Bacteria	Proteobacteria	Alphaproteobacteria	Puniceispirillales	SAR116 clade	uncultured Oceanibaculum sp.	uncultured Oceanibaculum sp.		5	2	0
ASV1146	Bacteria	Proteobacteria	Alphaproteobacteria	Puniceispirillales	SAR116 clade	uncultured Oceanibaculum sp.	uncultured Oceanibaculum sp.		111	40	35
ASV1147	Bacteria	Proteobacteria	Alphaproteobacteria	Puniceispirillales	SAR116 clade	uncultured Oceanibaculum sp.	uncultured Oceanibaculum sp.		1	1	0
ASV1148	Bacteria	Proteobacteria	Alphaproteobacteria	Puniceispirillales	SAR116 clade	uncultured Oceanibaculum sp.	uncultured Oceanibaculum sp.		26	8	6
ASV1149	Bacteria	Proteobacteria	Alphaproteobacteria	Puniceispirillales	SAR116 clade	uncultured Oceanibaculum sp.	uncultured Oceanibaculum sp.		27	15	5
ASV1150	Bacteria	Proteobacteria	Alphaproteobacteria	Puniceispirillales	SAR116 clade	uncultured Oceanibaculum sp.	uncultured Oceanibaculum sp.		56	38	25
ASV1151	Bacteria	Proteobacteria	Alphaproteobacteria	Puniceispirillales	SAR116 clade	uncultured Oceanibaculum sp.	uncultured Oceanibaculum sp.		0	0	5
ASV1152	Bacteria	Proteobacteria	Alphaproteobacteria	Puniceispirillales	SAR116 clade	uncultured Oceanibaculum sp.	uncultured Oceanibaculum sp.		16	32	13
ASV1153	Bacteria	Proteobacteria	Alphaproteobacteria	Puniceispirillales	SAR116 clade	uncultured Oceanibaculum sp.	uncultured Oceanibaculum sp.		55	29	12
ASV1154	Bacteria	Proteobacteria	Alphaproteobacteria	Puniceispirillales	SAR116 clade	unidentified marine bacterioplankton	unidentified marine bacterioplankton		33	13	35
ASV1155	Bacteria	Proteobacteria	Alphaproteobacteria	Puniceispirillales	SAR116 clade				4	2	0
ASV1156	Bacteria	Proteobacteria	Alphaproteobacteria	Puniceispirillales	SAR116 clade				10	9	3
ASV1157	Bacteria	Proteobacteria	Alphaproteobacteria	Puniceispirillales	SAR116 clade				118	40	33
ASV1158	Bacteria	Proteobacteria	Alphaproteobacteria	Puniceispirillales	SAR116 clade				1	4	1
ASV1159	Bacteria	Proteobacteria	Alphaproteobacteria	Puniceispirillales	SAR116 clade				7	13	4
ASV1160	Bacteria	Proteobacteria	Alphaproteobacteria	Puniceispirillales	SAR116 clade				16	24	11
ASV1161	Bacteria	Proteobacteria	Alphaproteobacteria	Puniceispirillales	SAR116 clade				31	13	5
ASV1162	Bacteria	Proteobacteria	Alphaproteobacteria	Puniceispirillales	SAR116 clade				3	2	1
ASV1163	Bacteria	Proteobacteria	Alphaproteobacteria	Puniceispirillales	SAR116 clade				9	11	3
ASV1164	Bacteria	Proteobacteria	Alphaproteobacteria	Puniceispirillales	SAR116 clade				8	17	2
ASV1165	Bacteria	Proteobacteria	Alphaproteobacteria	Puniceispirillales	SAR116 clade				2	0	0
ASV1166	Bacteria	Proteobacteria	Alphaproteobacteria	Puniceispirillales	SAR116 clade				112	26	4
ASV1167	Bacteria	Proteobacteria	Alphaproteobacteria	Puniceispirillales	SAR116 clade				0	2	1
ASV1168	Bacteria	Proteobacteria	Alphaproteobacteria	Puniceispirillales	SAR116 clade				48	6	2
ASV1169	Bacteria	Proteobacteria	Alphaproteobacteria	Puniceispirillales	uncultured				27	2	0
ASV1170	Bacteria	Proteobacteria	Alphaproteobacteria	Rhizobiales	Hyphomicrobiaceae	Filomicrobium			4	0	0
ASV1171	Bacteria	Proteobacteria	Alphaproteobacteria	Rhizobiales	Methyloligellaceae	Methyloceanibacter			1	1	0
ASV1172	Bacteria	Proteobacteria	Alphaproteobacteria	Rhizobiales	Rhizobiaceae	Cohaesibacter	marine metagenome		36	3	2
ASV1173	Bacteria	Proteobacteria	Alphaproteobacteria	Rhizobiales	Rhizobiaceae	Lentilitoribacter			1	1	1
ASV1174	Bacteria	Proteobacteria	Alphaproteobacteria	Rhizobiales	Rhizobiaceae	Pseudahrensia	uncultured bacterium		1	2	0
ASV1175	Bacteria	Proteobacteria	Alphaproteobacteria	Rhizobiales	Stappiaceae	Pseudovibrio	Ambiguous_taxa		1	7	0
ASV1176	Bacteria	Proteobacteria	Alphaproteobacteria	Rhizobiales	Stappiaceae				0	2	0
ASV1177	Bacteria	Proteobacteria	Alphaproteobacteria	Rhizobiales					1	0	1
ASV1178	Bacteria	Proteobacteria	Alphaproteobacteria	Rhizobiales					0	2	0
ASV1179	Bacteria	Proteobacteria	Alphaproteobacteria	Rhodobacterales	Rhodobacteraceae	Ascidiaceihabitans			103	14	3
ASV1180	Bacteria	Proteobacteria	Alphaproteobacteria	Rhodobacterales	Rhodobacteraceae	Ascidiaceihabitans			104	22	11
ASV1181	Bacteria	Proteobacteria	Alphaproteobacteria	Rhodobacterales	Rhodobacteraceae	Ascidiaceihabitans			0	4	18
ASV1182	Bacteria	Proteobacteria	Alphaproteobacteria	Rhodobacterales	Rhodobacteraceae	HIMB11	uncultured Rhodobacteraceae bacterium		27	3	2
ASV1183	Bacteria	Proteobacteria	Alphaproteobacteria	Rhodobacterales	Rhodobacteraceae	HIMB11			1	12	5
ASV1184	Bacteria	Proteobacteria	Alphaproteobacteria	Rhodobacterales	Rhodobacteraceae	HIMB11			120	40	37
ASV1185	Bacteria	Proteobacteria	Alphaproteobacteria	Rhodobacterales	Rhodobacteraceae	HIMB11			5	0	2
ASV1186	Bacteria	Proteobacteria	Alphaproteobacteria	Rhodobacterales	Rhodobacteraceae	HIMB11			96	13	3
ASV1187	Bacteria	Proteobacteria	Alphaproteobacteria	Rhodobacterales	Rhodobacteraceae	Jannaschia	Ambiguous_taxa		0	2	0
ASV1188	Bacteria	Proteobacteria	Alphaproteobacteria	Rhodobacterales	Rhodobacteraceae	Marinibacterium	uncultured bacterium		14	0	0
ASV1189	Bacteria	Proteobacteria	Alphaproteobacteria	Rhodobacterales	Rhodobacteraceae	Tropicibacter	Tropicibacter phthalicicus		1	0	1
ASV1190	Bacteria	Proteobacteria	Alphaproteobacteria	Rhodobacterales	Rhodobacteraceae	Tropicimonas	uncultured bacterium		2	0	0
ASV1191	Bacteria	Proteobacteria	Alphaproteobacteria	Rhodobacterales	Rhodobacteraceae	uncultured			0	0	2
ASV1192	Bacteria	Proteobacteria	Alphaproteobacteria	Rhodobacterales	Rhodobacteraceae	uncultured			0	0	2
ASV1193	Bacteria	Proteobacteria	Alphaproteobacteria	Rhodobacterales	Rhodobacteraceae	uncultured			5	22	40
ASV1194	Bacteria	Proteobacteria	Alphaproteobacteria	Rhodobacterales	Rhodobacteraceae	uncultured			5	26	40
ASV1195	Bacteria	Proteobacteria	Alphaproteobacteria	Rhodobacterales	Rhodobacteraceae				0	1	1
ASV1196	Bacteria	Proteobacteria	Alphaproteobacteria	Rhodobacterales	Rhodobacteraceae				52	14	4
ASV1197	Bacteria	Proteobacteria	Alphaproteobacteria	Rhodobacterales	Rhodobacteraceae				6	3	1
ASV1198	Bacteria	Proteobacteria	Alphaproteobacteria	Rhodobacterales	Rhodobacteraceae				15	1	1
ASV1199	Bacteria	Proteobacteria	Alphaproteobacteria	Rhodobacterales	Rhodobacteraceae				1	5	0
ASV1200	Bacteria	Proteobacteria	Alphaproteobacteria	Rhodobacterales	Rhodobacteraceae				10	1	0
ASV1201	Bacteria	Proteobacteria	Alphaproteobacteria	Rhodobacterales	Rhodobacteraceae				33	2	2
ASV1202	Bacteria	Proteobacteria	Alphaproteobacteria	Rhodobacterales	Rhodobacteraceae				0	0	2
ASV1203	Bacteria	Proteobacteria	Alphaproteobacteria	Rhodobacterales	Rhodobacteraceae				8	2	1
ASV1204	Bacteria	Proteobacteria	Alphaproteobacteria	Rhodobacterales	Rhodobacteraceae				0	0	12
ASV1205	Bacteria	Proteobacteria	Alphaproteobacteria	Rhodobacterales	Rhodobacteraceae				8	0	0
ASV1206	Bacteria	Proteobacteria	Alphaproteobacteria	Rhodobacterales	Rhodobacteraceae				2	0	0
ASV1207	Bacteria	Proteobacteria	Alphaproteobacteria	Rhodobacterales	Rhodobacteraceae				2	1	0
ASV1208	Bacteria	Proteobacteria	Alphaproteobacteria	Rhodobacterales	Rhodobacteraceae				27	1	0
ASV1209	Bacteria	Proteobacteria	Alphaproteobacteria	Rhodobacterales	Rhodobacteraceae				117	24	12
ASV1210	Bacteria	Proteobacteria	Alphaproteobacteria	Rhodobacterales	Rhodobacteraceae				0	2	0
ASV1211	Bacteria	Proteobacteria	Alphaproteobacteria	Rhodobacterales	Rhodobacteraceae				120	37	40
ASV1212	Bacteria	Proteobacteria	Alphaproteobacteria	Rhodobacterales	Rhodobacteraceae				2	0	0
ASV1213	Bacteria	Proteobacteria	Alphaproteobacteria	Rhodobacterales	Rhodobacteraceae				120	38	40
ASV1214	Bacteria	Proteobacteria	Alphaproteobacteria	Rhodobacterales	Rhodobacteraceae				3	0	0
ASV1215	Bacteria	Proteobacteria	Alphaproteobacteria	Rhodobacterales	Rhodobacteraceae				1	0	1
ASV1216	Bacteria	Proteobacteria	Alphaproteobacteria	Rhodobacterales	Rhodobacteraceae				0	1	7
ASV1217	Bacteria	Proteobacteria	Alphaproteobacteria	Rhodobacterales	Rhodobacteraceae				1	1	0
ASV1218	Bacteria	Proteobacteria	Alphaproteobacteria	Rhodospirillales	Magnetospiraceae	uncultured	marine metagenome		8	0	4
ASV1219	Bacteria	Proteobacteria	Alphaproteobacteria	Rhodospirillales	Magnetospiraceae	uncultured	marine metagenome		1	0	1
ASV1220	Bacteria	Proteobacteria	Alphaproteobacteria	Rhodospirillales	Magnetospiraceae	uncultured	marine metagenome		2	2	5
ASV1221	Bacteria	Proteobacteria	Alphaproteobacteria	Rhodospirillales	Magnetospiraceae	uncultured	uncultured bacterium		2	2	1
ASV1222	Bacteria	Proteobacteria	Alphaproteobacteria	Rhodospirillales	Magnetospiraceae	uncultured	uncultured bacterium		0	3	3
ASV1223	Bacteria	Proteobacteria	Alphaproteobacteria	Rhodospirillales	Magnetospiraceae	uncultured	uncultured bacterium		18	0	0
ASV1224	Bacteria	Proteobacteria	Alphaproteobacteria	Rhodospirillales	Magnetospiraceae	uncultured	uncultured bacterium		6	0	0
ASV1225	Bacteria	Proteobacteria	Alphaproteobacteria	Rhodospirillales	Magnetospiraceae	uncultured	uncultured bacterium		1	0	3
ASV1226	Bacteria	Proteobacteria	Alphaproteobacteria	Rhodospirillales	Magnetospiraceae	uncultured	uncultured deep-sea bacterium		0	0	3
ASV1227	Bacteria	Proteobacteria	Alphaproteobacteria	Rhodospirillales	Magnetospiraceae	uncultured	uncultured marine bacterium		0	2	9
ASV1228	Bacteria	Proteobacteria	Alphaproteobacteria	Rhodospirillales	Magnetospiraceae	uncultured			7	0	0
ASV1229	Bacteria	Proteobacteria	Alphaproteobacteria	Rhodospirillales	Magnetospiraceae	uncultured			23	2	1
ASV1230	Bacteria	Proteobacteria	Alphaproteobacteria	Rhodospirillales	Rhodospirillaceae	Haematospirillum	uncultured bacterium		0	2	0
ASV1231	Bacteria	Proteobacteria	Alphaproteobacteria	Rhodospirillales	Rhodospirillaceae	uncultured	uncultured alpha proteobacterium		13	0	1
ASV1232	Bacteria	Proteobacteria	Alphaproteobacteria	Rhodospirillales	Rhodospirillaceae				0	2	0
ASV1233	Bacteria	Proteobacteria	Alphaproteobacteria	Rhodospirillales	Terasakiellaceae	Terasakiella	uncultured bacterium		3	0	0
ASV1234	Bacteria	Proteobacteria	Alphaproteobacteria	Rhodospirillales	Terasakiellaceae	Terasakiella	uncultured bacterium		2	0	1
ASV1235	Bacteria	Proteobacteria	Alphaproteobacteria	Rhodospirillales	Terasakiellaceae	Terasakiella	uncultured bacterium		1	0	1
ASV1236	Bacteria	Proteobacteria	Alphaproteobacteria	Rhodospirillales	Terasakiellaceae	uncultured	uncultured bacterium		2	0	0
ASV1237	Bacteria	Proteobacteria	Alphaproteobacteria	Rhodospirillales	uncultured	uncultured bacterium	uncultured bacterium		1	1	0
ASV1238	Bacteria	Proteobacteria	Alphaproteobacteria	Rhodovibrionales	Kiloniellaceae	Tistlia	marine metagenome		10	3	2
ASV1239	Bacteria	Proteobacteria	Alphaproteobacteria	Rickettsiales	AB1	uncultured alpha proteobacterium	uncultured alpha proteobacterium		2	1	0
ASV1240	Bacteria	Proteobacteria	Alphaproteobacteria	Rickettsiales	AB1	uncultured alpha proteobacterium	uncultured alpha proteobacterium		2	0	1
ASV1241	Bacteria	Proteobacteria	Alphaproteobacteria	Rickettsiales	Midichloriaceae	MD3-55	Ambiguous_taxa		3	0	0
ASV1242	Bacteria	Proteobacteria	Alphaproteobacteria	Rickettsiales	Midichloriaceae	MD3-55	uncultured alpha proteobacterium		6	0	0
ASV1243	Bacteria	Proteobacteria	Alphaproteobacteria	Rickettsiales	Midichloriaceae	MD3-55	uncultured alpha proteobacterium		17	2	1
ASV1244	Bacteria	Proteobacteria	Alphaproteobacteria	Rickettsiales	Midichloriaceae	MD3-55	uncultured bacterium		6	0	0
ASV1245	Bacteria	Proteobacteria	Alphaproteobacteria	Rickettsiales	Midichloriaceae	MD3-55	uncultured bacterium		8	1	0
ASV1246	Bacteria	Proteobacteria	Alphaproteobacteria	Rickettsiales	Midichloriaceae	MD3-55			3	0	0
ASV1247	Bacteria	Proteobacteria	Alphaproteobacteria	Rickettsiales	Midichloriaceae	MD3-55			11	1	0
ASV1248	Bacteria	Proteobacteria	Alphaproteobacteria	Rickettsiales	Midichloriaceae				1	1	0
ASV1249	Bacteria	Proteobacteria	Alphaproteobacteria	Rickettsiales	Mitochondria	Berkeleya fennica	Berkeleya fennica		26	2	1
ASV1250	Bacteria	Proteobacteria	Alphaproteobacteria	Rickettsiales	Mitochondria	Berkeleya fennica	Berkeleya fennica		5	2	0
ASV1251	Bacteria	Proteobacteria	Alphaproteobacteria	Rickettsiales	Mitochondria	Berkeleya fennica	Berkeleya fennica		3	0	0
ASV1252	Bacteria	Proteobacteria	Alphaproteobacteria	Rickettsiales	Mitochondria	Berkeleya fennica	Berkeleya fennica		7	1	2
ASV1253	Bacteria	Proteobacteria	Alphaproteobacteria	Rickettsiales	Mitochondria	Berkeleya fennica	Berkeleya fennica		4	0	0
ASV1254	Bacteria	Proteobacteria	Alphaproteobacteria	Rickettsiales	Mitochondria	Berkeleya fennica	Berkeleya fennica		1	1	0
ASV1255	Bacteria	Proteobacteria	Alphaproteobacteria	Rickettsiales	Mitochondria	Berkeleya fennica	Berkeleya fennica		2	0	0
ASV1256	Bacteria	Proteobacteria	Alphaproteobacteria	Rickettsiales	Mitochondria	Berkeleya fennica	Berkeleya fennica		4	0	0
ASV1257	Bacteria	Proteobacteria	Alphaproteobacteria	Rickettsiales	Mitochondria	Jakoba bahamiensis	Jakoba bahamiensis		6	1	0
ASV1258	Bacteria	Proteobacteria	Alphaproteobacteria	Rickettsiales	Mitochondria	marine metagenome	marine metagenome		2	1	1
ASV1259	Bacteria	Proteobacteria	Alphaproteobacteria	Rickettsiales	Mitochondria	marine metagenome	marine metagenome		2	0	1
ASV1260	Bacteria	Proteobacteria	Alphaproteobacteria	Rickettsiales	Mitochondria	marine metagenome	marine metagenome		120	32	15
ASV1261	Bacteria	Proteobacteria	Alphaproteobacteria	Rickettsiales	Mitochondria	marine metagenome	marine metagenome		0	0	2
ASV1262	Bacteria	Proteobacteria	Alphaproteobacteria	Rickettsiales	Mitochondria	marine metagenome	marine metagenome		8	1	0
ASV1263	Bacteria	Proteobacteria	Alphaproteobacteria	Rickettsiales	Mitochondria	marine metagenome	marine metagenome		40	9	5
ASV1264	Bacteria	Proteobacteria	Alphaproteobacteria	Rickettsiales	Mitochondria	marine metagenome	marine metagenome		5	6	13
ASV1265	Bacteria	Proteobacteria	Alphaproteobacteria	Rickettsiales	Mitochondria	marine metagenome	marine metagenome		7	1	6
ASV1266	Bacteria	Proteobacteria	Alphaproteobacteria	Rickettsiales	Mitochondria	marine metagenome	marine metagenome		7	0	1
ASV1267	Bacteria	Proteobacteria	Alphaproteobacteria	Rickettsiales	Mitochondria	marine metagenome	marine metagenome		18	3	0
ASV1268	Bacteria	Proteobacteria	Alphaproteobacteria	Rickettsiales	Mitochondria	marine metagenome	marine metagenome		2	0	0
ASV1269	Bacteria	Proteobacteria	Alphaproteobacteria	Rickettsiales	Mitochondria	marine metagenome	marine metagenome		1	0	2
ASV1270	Bacteria	Proteobacteria	Alphaproteobacteria	Rickettsiales	Mitochondria	marine metagenome	marine metagenome		85	12	4
ASV1271	Bacteria	Proteobacteria	Alphaproteobacteria	Rickettsiales	Mitochondria	marine metagenome	marine metagenome		17	5	10
ASV1272	Bacteria	Proteobacteria	Alphaproteobacteria	Rickettsiales	Mitochondria	marine metagenome	marine metagenome		14	2	1
ASV1273	Bacteria	Proteobacteria	Alphaproteobacteria	Rickettsiales	Mitochondria	marine metagenome	marine metagenome		1	1	0
ASV1274	Bacteria	Proteobacteria	Alphaproteobacteria	Rickettsiales	Mitochondria	metagenome	metagenome		2	0	0
ASV1275	Bacteria	Proteobacteria	Alphaproteobacteria	Rickettsiales	Mitochondria	metagenome	metagenome		10	2	2
ASV1276	Bacteria	Proteobacteria	Alphaproteobacteria	Rickettsiales	Mitochondria	metagenome	metagenome		17	1	4
ASV1277	Bacteria	Proteobacteria	Alphaproteobacteria	Rickettsiales	Mitochondria	metagenome	metagenome		3	0	0
ASV1278	Bacteria	Proteobacteria	Alphaproteobacteria	Rickettsiales	Mitochondria	metagenome	metagenome		4	2	4
ASV1279	Bacteria	Proteobacteria	Alphaproteobacteria	Rickettsiales	Mitochondria	metagenome	metagenome		23	1	2
ASV1280	Bacteria	Proteobacteria	Alphaproteobacteria	Rickettsiales	Mitochondria	metagenome	metagenome		5	3	3
ASV1281	Bacteria	Proteobacteria	Alphaproteobacteria	Rickettsiales	Mitochondria	metagenome	metagenome		3	1	2
ASV1282	Bacteria	Proteobacteria	Alphaproteobacteria	Rickettsiales	Mitochondria	metagenome	metagenome		8	0	0
ASV1283	Bacteria	Proteobacteria	Alphaproteobacteria	Rickettsiales	Mitochondria	metagenome	metagenome		3	0	0
ASV1284	Bacteria	Proteobacteria	Alphaproteobacteria	Rickettsiales	Mitochondria	Nephroselmis olivacea	Nephroselmis olivacea		9	0	1
ASV1285	Bacteria	Proteobacteria	Alphaproteobacteria	Rickettsiales	Mitochondria	Nephroselmis olivacea	Nephroselmis olivacea		16	5	4
ASV1286	Bacteria	Proteobacteria	Alphaproteobacteria	Rickettsiales	Mitochondria	Picochlorum sp. SENEW3	Picochlorum sp. SENEW3		11	0	0
ASV1287	Bacteria	Proteobacteria	Alphaproteobacteria	Rickettsiales	Mitochondria	Picochlorum sp. SENEW3	Picochlorum sp. SENEW3		15	2	0
ASV1288	Bacteria	Proteobacteria	Alphaproteobacteria	Rickettsiales	Mitochondria	Proteobacteria bacterium JGI 0000113-D06	Proteobacteria bacterium JGI 0000113-D06		0	0	4
ASV1289	Bacteria	Proteobacteria	Alphaproteobacteria	Rickettsiales	Mitochondria	Proteobacteria bacterium JGI 0000113-D06	Proteobacteria bacterium JGI 0000113-D06		6	0	0
ASV1290	Bacteria	Proteobacteria	Alphaproteobacteria	Rickettsiales	Mitochondria	Proteobacteria bacterium JGI 0000113-D06	Proteobacteria bacterium JGI 0000113-D06		2	0	3
ASV1291	Bacteria	Proteobacteria	Alphaproteobacteria	Rickettsiales	Mitochondria	Proteobacteria bacterium JGI 0000113-D06	Proteobacteria bacterium JGI 0000113-D06		8	0	0
ASV1292	Bacteria	Proteobacteria	Alphaproteobacteria	Rickettsiales	Mitochondria	Proteobacteria bacterium JGI 0000113-D06	Proteobacteria bacterium JGI 0000113-D06		1	1	1
ASV1293	Bacteria	Proteobacteria	Alphaproteobacteria	Rickettsiales	Mitochondria	Proteobacteria bacterium JGI 0000113-D06	Proteobacteria bacterium JGI 0000113-D06		8	1	8
ASV1294	Bacteria	Proteobacteria	Alphaproteobacteria	Rickettsiales	Mitochondria	Proteobacteria bacterium JGI 0000113-D06	Proteobacteria bacterium JGI 0000113-D06		10	2	0
ASV1295	Bacteria	Proteobacteria	Alphaproteobacteria	Rickettsiales	Mitochondria	Pyramimonas parkeae	Pyramimonas parkeae		7	2	2
ASV1296	Bacteria	Proteobacteria	Alphaproteobacteria	Rickettsiales	Mitochondria	Pyramimonas parkeae	Pyramimonas parkeae		1	1	1
ASV1297	Bacteria	Proteobacteria	Alphaproteobacteria	Rickettsiales	Mitochondria	Riquetophycus sp. HSY-2014a	Riquetophycus sp. HSY-2014a		1	1	0
ASV1298	Bacteria	Proteobacteria	Alphaproteobacteria	Rickettsiales	Mitochondria	uncultured bacterium	uncultured bacterium		4	0	0
ASV1299	Bacteria	Proteobacteria	Alphaproteobacteria	Rickettsiales	Mitochondria	uncultured bacterium	uncultured bacterium		14	4	1
ASV1300	Bacteria	Proteobacteria	Alphaproteobacteria	Rickettsiales	Mitochondria	uncultured bacterium	uncultured bacterium		10	0	0
ASV1301	Bacteria	Proteobacteria	Alphaproteobacteria	Rickettsiales	Mitochondria	uncultured bacterium	uncultured bacterium		7	3	5
ASV1302	Bacteria	Proteobacteria	Alphaproteobacteria	Rickettsiales	Mitochondria	uncultured bacterium	uncultured bacterium		0	1	2
ASV1303	Bacteria	Proteobacteria	Alphaproteobacteria	Rickettsiales	Mitochondria	uncultured bacterium	uncultured bacterium		4	0	2
ASV1304	Bacteria	Proteobacteria	Alphaproteobacteria	Rickettsiales	Mitochondria	uncultured bacterium	uncultured bacterium		6	0	0
ASV1305	Bacteria	Proteobacteria	Alphaproteobacteria	Rickettsiales	Mitochondria	uncultured bacterium	uncultured bacterium		4	0	0
ASV1306	Bacteria	Proteobacteria	Alphaproteobacteria	Rickettsiales	Mitochondria	uncultured bacterium	uncultured bacterium		2	1	0
ASV1307	Bacteria	Proteobacteria	Alphaproteobacteria	Rickettsiales	Mitochondria	uncultured bacterium	uncultured bacterium		22	1	1
ASV1308	Bacteria	Proteobacteria	Alphaproteobacteria	Rickettsiales	Mitochondria	uncultured bacterium	uncultured bacterium		2	0	0
ASV1309	Bacteria	Proteobacteria	Alphaproteobacteria	Rickettsiales	Mitochondria	uncultured bacterium	uncultured bacterium		1	1	0
ASV1310	Bacteria	Proteobacteria	Alphaproteobacteria	Rickettsiales	Mitochondria	uncultured bacterium	uncultured bacterium		5	0	0
ASV1311	Bacteria	Proteobacteria	Alphaproteobacteria	Rickettsiales	Mitochondria	uncultured bacterium	uncultured bacterium		7	0	0
ASV1312	Bacteria	Proteobacteria	Alphaproteobacteria	Rickettsiales	Mitochondria	uncultured bacterium	uncultured bacterium		15	5	14
ASV1313	Bacteria	Proteobacteria	Alphaproteobacteria	Rickettsiales	Mitochondria	uncultured bacterium	uncultured bacterium		3	4	21
ASV1314	Bacteria	Proteobacteria	Alphaproteobacteria	Rickettsiales	Mitochondria	uncultured bacterium	uncultured bacterium		7	0	1
ASV1315	Bacteria	Proteobacteria	Alphaproteobacteria	Rickettsiales	Mitochondria	uncultured bacterium	uncultured bacterium		9	0	0
ASV1316	Bacteria	Proteobacteria	Alphaproteobacteria	Rickettsiales	Mitochondria	uncultured bacterium	uncultured bacterium		3	3	4
ASV1317	Bacteria	Proteobacteria	Alphaproteobacteria	Rickettsiales	Mitochondria	uncultured bacterium	uncultured bacterium		0	4	14
ASV1318	Bacteria	Proteobacteria	Alphaproteobacteria	Rickettsiales	Mitochondria	uncultured bacterium	uncultured bacterium		0	1	5
ASV1319	Bacteria	Proteobacteria	Alphaproteobacteria	Rickettsiales	Mitochondria	uncultured bacterium	uncultured bacterium		5	0	0
ASV1320	Bacteria	Proteobacteria	Alphaproteobacteria	Rickettsiales	Mitochondria	uncultured bacterium	uncultured bacterium		1	1	0
ASV1321	Bacteria	Proteobacteria	Alphaproteobacteria	Rickettsiales	Mitochondria	uncultured bacterium	uncultured bacterium		2	0	0
ASV1322	Bacteria	Proteobacteria	Alphaproteobacteria	Rickettsiales	Mitochondria	uncultured bacterium	uncultured bacterium		0	0	5
ASV1323	Bacteria	Proteobacteria	Alphaproteobacteria	Rickettsiales	Mitochondria	uncultured bacterium	uncultured bacterium		2	0	0
ASV1324	Bacteria	Proteobacteria	Alphaproteobacteria	Rickettsiales	Mitochondria	uncultured bacterium	uncultured bacterium		5	1	0
ASV1325	Bacteria	Proteobacteria	Alphaproteobacteria	Rickettsiales	Mitochondria	uncultured bacterium	uncultured bacterium		4	0	0
ASV1326	Bacteria	Proteobacteria	Alphaproteobacteria	Rickettsiales	Mitochondria	uncultured bacterium	uncultured bacterium		5	0	0
ASV1327	Bacteria	Proteobacteria	Alphaproteobacteria	Rickettsiales	Mitochondria	uncultured bacterium	uncultured bacterium		0	0	2
ASV1328	Bacteria	Proteobacteria	Alphaproteobacteria	Rickettsiales	Mitochondria	uncultured bacterium	uncultured bacterium		7	0	0
ASV1329	Bacteria	Proteobacteria	Alphaproteobacteria	Rickettsiales	Mitochondria	uncultured bacterium	uncultured bacterium		6	0	0
ASV1330	Bacteria	Proteobacteria	Alphaproteobacteria	Rickettsiales	Mitochondria	uncultured bacterium	uncultured bacterium		2	0	0
ASV1331	Bacteria	Proteobacteria	Alphaproteobacteria	Rickettsiales	Mitochondria	uncultured bacterium	uncultured bacterium		2	0	0
ASV1332	Bacteria	Proteobacteria	Alphaproteobacteria	Rickettsiales	Mitochondria	uncultured bacterium	uncultured bacterium		0	1	3
ASV1333	Bacteria	Proteobacteria	Alphaproteobacteria	Rickettsiales	Mitochondria	uncultured bacterium	uncultured bacterium		0	2	2
ASV1334	Bacteria	Proteobacteria	Alphaproteobacteria	Rickettsiales	Mitochondria	uncultured bacterium	uncultured bacterium		2	0	0
ASV1335	Bacteria	Proteobacteria	Alphaproteobacteria	Rickettsiales	Mitochondria	uncultured bacterium	uncultured bacterium		2	2	1
ASV1336	Bacteria	Proteobacteria	Alphaproteobacteria	Rickettsiales	Mitochondria	uncultured bacterium	uncultured bacterium		2	0	0
ASV1337	Bacteria	Proteobacteria	Alphaproteobacteria	Rickettsiales	Mitochondria	uncultured bacterium	uncultured bacterium		7	1	2
ASV1338	Bacteria	Proteobacteria	Alphaproteobacteria	Rickettsiales	Mitochondria	uncultured bacterium	uncultured bacterium		2	0	0
ASV1339	Bacteria	Proteobacteria	Alphaproteobacteria	Rickettsiales	Mitochondria	uncultured bacterium	uncultured bacterium		21	7	1
ASV1340	Bacteria	Proteobacteria	Alphaproteobacteria	Rickettsiales	Mitochondria	uncultured bacterium	uncultured bacterium		22	2	0
ASV1341	Bacteria	Proteobacteria	Alphaproteobacteria	Rickettsiales	Mitochondria	uncultured bacterium	uncultured bacterium		4	0	0
ASV1342	Bacteria	Proteobacteria	Alphaproteobacteria	Rickettsiales	Mitochondria	uncultured bacterium	uncultured bacterium		7	0	0
ASV1343	Bacteria	Proteobacteria	Alphaproteobacteria	Rickettsiales	Mitochondria	uncultured bacterium	uncultured bacterium		8	1	0
ASV1344	Bacteria	Proteobacteria	Alphaproteobacteria	Rickettsiales	Mitochondria	uncultured bacterium	uncultured bacterium		8	8	1
ASV1345	Bacteria	Proteobacteria	Alphaproteobacteria	Rickettsiales	Mitochondria	uncultured bacterium	uncultured bacterium		2	0	0
ASV1346	Bacteria	Proteobacteria	Alphaproteobacteria	Rickettsiales	Mitochondria	uncultured bacterium	uncultured bacterium		5	1	0
ASV1347	Bacteria	Proteobacteria	Alphaproteobacteria	Rickettsiales	Mitochondria	uncultured bacterium	uncultured bacterium		0	0	3
ASV1348	Bacteria	Proteobacteria	Alphaproteobacteria	Rickettsiales	Mitochondria	uncultured bacterium	uncultured bacterium		3	1	0
ASV1349	Bacteria	Proteobacteria	Alphaproteobacteria	Rickettsiales	Mitochondria	uncultured bacterium	uncultured bacterium		3	0	0
ASV1350	Bacteria	Proteobacteria	Alphaproteobacteria	Rickettsiales	Mitochondria	uncultured bacterium	uncultured bacterium		8	0	0
ASV1351	Bacteria	Proteobacteria	Alphaproteobacteria	Rickettsiales	Mitochondria	uncultured bacterium	uncultured bacterium		5	10	9
ASV1352	Bacteria	Proteobacteria	Alphaproteobacteria	Rickettsiales	Mitochondria	uncultured bacterium	uncultured bacterium		2	1	0
ASV1353	Bacteria	Proteobacteria	Alphaproteobacteria	Rickettsiales	Mitochondria	uncultured bacterium	uncultured bacterium		0	0	2
ASV1354	Bacteria	Proteobacteria	Alphaproteobacteria	Rickettsiales	Mitochondria	uncultured bacterium	uncultured bacterium		6	0	0
ASV1355	Bacteria	Proteobacteria	Alphaproteobacteria	Rickettsiales	Mitochondria	uncultured bacterium	uncultured bacterium		0	4	0
ASV1356	Bacteria	Proteobacteria	Alphaproteobacteria	Rickettsiales	Mitochondria	uncultured bacterium	uncultured bacterium		5	1	1
ASV1357	Bacteria	Proteobacteria	Alphaproteobacteria	Rickettsiales	Mitochondria	uncultured bacterium	uncultured bacterium		8	2	6
ASV1358	Bacteria	Proteobacteria	Alphaproteobacteria	Rickettsiales	Mitochondria	uncultured bacterium	uncultured bacterium		21	4	5
ASV1359	Bacteria	Proteobacteria	Alphaproteobacteria	Rickettsiales	Mitochondria	uncultured bacterium	uncultured bacterium		6	0	0
ASV1360	Bacteria	Proteobacteria	Alphaproteobacteria	Rickettsiales	Mitochondria	uncultured bacterium	uncultured bacterium		4	0	0
ASV1361	Bacteria	Proteobacteria	Alphaproteobacteria	Rickettsiales	Mitochondria	uncultured bacterium	uncultured bacterium		1	1	0
ASV1362	Bacteria	Proteobacteria	Alphaproteobacteria	Rickettsiales	Mitochondria	uncultured bacterium	uncultured bacterium		23	1	0
ASV1363	Bacteria	Proteobacteria	Alphaproteobacteria	Rickettsiales	Mitochondria	uncultured bacterium	uncultured bacterium		1	2	0
ASV1364	Bacteria	Proteobacteria	Alphaproteobacteria	Rickettsiales	Mitochondria	uncultured bacterium	uncultured bacterium		4	0	1
ASV1365	Bacteria	Proteobacteria	Alphaproteobacteria	Rickettsiales	Mitochondria	uncultured bacterium	uncultured bacterium		2	0	0
ASV1366	Bacteria	Proteobacteria	Alphaproteobacteria	Rickettsiales	Mitochondria	uncultured bacterium	uncultured bacterium		11	3	4
ASV1367	Bacteria	Proteobacteria	Alphaproteobacteria	Rickettsiales	Mitochondria	uncultured bacterium	uncultured bacterium		13	1	0
ASV1368	Bacteria	Proteobacteria	Alphaproteobacteria	Rickettsiales	Mitochondria	uncultured bacterium	uncultured bacterium		2	0	0
ASV1369	Bacteria	Proteobacteria	Alphaproteobacteria	Rickettsiales	Mitochondria	uncultured bacterium	uncultured bacterium		1	1	2
ASV1370	Bacteria	Proteobacteria	Alphaproteobacteria	Rickettsiales	Mitochondria	uncultured bacterium	uncultured bacterium		14	0	0
ASV1371	Bacteria	Proteobacteria	Alphaproteobacteria	Rickettsiales	Mitochondria	uncultured bacterium	uncultured bacterium		0	0	8
ASV1372	Bacteria	Proteobacteria	Alphaproteobacteria	Rickettsiales	Mitochondria	uncultured bacterium	uncultured bacterium		2	1	0
ASV1373	Bacteria	Proteobacteria	Alphaproteobacteria	Rickettsiales	Mitochondria	uncultured bacterium	uncultured bacterium		4	0	0
ASV1374	Bacteria	Proteobacteria	Alphaproteobacteria	Rickettsiales	Mitochondria	uncultured bacterium	uncultured bacterium		26	3	0
ASV1375	Bacteria	Proteobacteria	Alphaproteobacteria	Rickettsiales	Mitochondria	uncultured bacterium	uncultured bacterium		4	0	0
ASV1376	Bacteria	Proteobacteria	Alphaproteobacteria	Rickettsiales	Mitochondria	uncultured bacterium	uncultured bacterium		12	2	1
ASV1377	Bacteria	Proteobacteria	Alphaproteobacteria	Rickettsiales	Mitochondria	uncultured bacterium	uncultured bacterium		0	0	2
ASV1378	Bacteria	Proteobacteria	Alphaproteobacteria	Rickettsiales	Mitochondria	uncultured bacterium	uncultured bacterium		3	1	3
ASV1379	Bacteria	Proteobacteria	Alphaproteobacteria	Rickettsiales	Mitochondria	uncultured bacterium	uncultured bacterium		3	1	0
ASV1380	Bacteria	Proteobacteria	Alphaproteobacteria	Rickettsiales	Mitochondria	uncultured bacterium	uncultured bacterium		6	0	0
ASV1381	Bacteria	Proteobacteria	Alphaproteobacteria	Rickettsiales	Mitochondria	uncultured bacterium	uncultured bacterium		12	0	0
ASV1382	Bacteria	Proteobacteria	Alphaproteobacteria	Rickettsiales	Mitochondria	uncultured bacterium	uncultured bacterium		3	2	2
ASV1383	Bacteria	Proteobacteria	Alphaproteobacteria	Rickettsiales	Mitochondria	uncultured bacterium	uncultured bacterium		6	2	1
ASV1384	Bacteria	Proteobacteria	Alphaproteobacteria	Rickettsiales	Mitochondria	uncultured bacterium	uncultured bacterium		64	14	4
ASV1385	Bacteria	Proteobacteria	Alphaproteobacteria	Rickettsiales	Mitochondria	uncultured bacterium	uncultured bacterium		13	4	1
ASV1386	Bacteria	Proteobacteria	Alphaproteobacteria	Rickettsiales	Mitochondria	uncultured bacterium	uncultured bacterium		6	0	0
ASV1387	Bacteria	Proteobacteria	Alphaproteobacteria	Rickettsiales	Mitochondria	uncultured bacterium	uncultured bacterium		3	0	0
ASV1388	Bacteria	Proteobacteria	Alphaproteobacteria	Rickettsiales	Mitochondria	uncultured bacterium	uncultured bacterium		0	0	4
ASV1389	Bacteria	Proteobacteria	Alphaproteobacteria	Rickettsiales	Mitochondria				5	0	0
ASV1390	Bacteria	Proteobacteria	Alphaproteobacteria	Rickettsiales	Mitochondria				2	0	0
ASV1391	Bacteria	Proteobacteria	Alphaproteobacteria	Rickettsiales	Mitochondria				20	0	1
ASV1392	Bacteria	Proteobacteria	Alphaproteobacteria	Rickettsiales	Mitochondria				48	2	2
ASV1393	Bacteria	Proteobacteria	Alphaproteobacteria	Rickettsiales	Mitochondria				11	2	0
ASV1394	Bacteria	Proteobacteria	Alphaproteobacteria	Rickettsiales	Mitochondria				5	0	0
ASV1395	Bacteria	Proteobacteria	Alphaproteobacteria	Rickettsiales	Mitochondria				2	0	0
ASV1396	Bacteria	Proteobacteria	Alphaproteobacteria	Rickettsiales	Mitochondria				8	0	0
ASV1397	Bacteria	Proteobacteria	Alphaproteobacteria	Rickettsiales	Mitochondria				2	0	0
ASV1398	Bacteria	Proteobacteria	Alphaproteobacteria	Rickettsiales	Mitochondria				5	6	6
ASV1399	Bacteria	Proteobacteria	Alphaproteobacteria	Rickettsiales	Mitochondria				81	15	10
ASV1400	Bacteria	Proteobacteria	Alphaproteobacteria	Rickettsiales	Mitochondria				3	0	0
ASV1401	Bacteria	Proteobacteria	Alphaproteobacteria	Rickettsiales	Mitochondria				3	0	0
ASV1402	Bacteria	Proteobacteria	Alphaproteobacteria	Rickettsiales	Mitochondria				7	0	0
ASV1403	Bacteria	Proteobacteria	Alphaproteobacteria	Rickettsiales	Mitochondria				8	3	0
ASV1404	Bacteria	Proteobacteria	Alphaproteobacteria	Rickettsiales	Mitochondria				0	4	1
ASV1405	Bacteria	Proteobacteria	Alphaproteobacteria	Rickettsiales	Mitochondria				4	0	0
ASV1406	Bacteria	Proteobacteria	Alphaproteobacteria	Rickettsiales	Rickettsiaceae	Candidatus Cryptoprodotis	uncultured bacterium		3	0	0
ASV1407	Bacteria	Proteobacteria	Alphaproteobacteria	Rickettsiales	Rickettsiaceae	Candidatus Megaira			43	7	0
ASV1408	Bacteria	Proteobacteria	Alphaproteobacteria	Rickettsiales	Rickettsiaceae	Candidatus Megaira			1	0	3
ASV1409	Bacteria	Proteobacteria	Alphaproteobacteria	Rickettsiales	Rickettsiaceae	uncultured	Ambiguous_taxa		3	1	0
ASV1410	Bacteria	Proteobacteria	Alphaproteobacteria	Rickettsiales	Rickettsiaceae	uncultured	metagenome		12	0	0
ASV1411	Bacteria	Proteobacteria	Alphaproteobacteria	Rickettsiales	Rickettsiaceae	uncultured	metagenome		19	0	0
ASV1412	Bacteria	Proteobacteria	Alphaproteobacteria	Rickettsiales	Rickettsiaceae	uncultured	uncultured bacterium		20	1	1
ASV1413	Bacteria	Proteobacteria	Alphaproteobacteria	Rickettsiales	Rickettsiaceae	uncultured	uncultured bacterium		4	1	1
ASV1414	Bacteria	Proteobacteria	Alphaproteobacteria	Rickettsiales	Rickettsiaceae	uncultured	uncultured bacterium		16	2	0
ASV1415	Bacteria	Proteobacteria	Alphaproteobacteria	Rickettsiales	Rickettsiaceae	uncultured	uncultured bacterium		15	0	0
ASV1416	Bacteria	Proteobacteria	Alphaproteobacteria	Rickettsiales	Rickettsiaceae	uncultured	uncultured bacterium		2	0	0
ASV1417	Bacteria	Proteobacteria	Alphaproteobacteria	Rickettsiales	Rickettsiaceae	uncultured	uncultured bacterium		5	0	0
ASV1418	Bacteria	Proteobacteria	Alphaproteobacteria	Rickettsiales	Rickettsiaceae	uncultured	uncultured bacterium		3	0	0
ASV1419	Bacteria	Proteobacteria	Alphaproteobacteria	Rickettsiales	Rickettsiaceae	uncultured	uncultured bacterium		6	0	0
ASV1420	Bacteria	Proteobacteria	Alphaproteobacteria	Rickettsiales	Rickettsiaceae	uncultured			9	0	0
ASV1421	Bacteria	Proteobacteria	Alphaproteobacteria	Rickettsiales	Rickettsiaceae	uncultured			2	0	0
ASV1422	Bacteria	Proteobacteria	Alphaproteobacteria	Rickettsiales	S25-593	marine metagenome	marine metagenome		0	0	2
ASV1423	Bacteria	Proteobacteria	Alphaproteobacteria	Rickettsiales	S25-593	uncultured bacterium	uncultured bacterium		1	0	5
ASV1424	Bacteria	Proteobacteria	Alphaproteobacteria	Rickettsiales	S25-593	uncultured bacterium	uncultured bacterium		2	1	2
ASV1425	Bacteria	Proteobacteria	Alphaproteobacteria	Rickettsiales	S25-593	uncultured bacterium	uncultured bacterium		0	0	3
ASV1426	Bacteria	Proteobacteria	Alphaproteobacteria	Rickettsiales	S25-593	uncultured marine bacterium	uncultured marine bacterium		1	3	13
ASV1427	Bacteria	Proteobacteria	Alphaproteobacteria	Rickettsiales	S25-593	uncultured marine bacterium	uncultured marine bacterium		0	0	5
ASV1428	Bacteria	Proteobacteria	Alphaproteobacteria	Rickettsiales	S25-593	uncultured marine bacterium	uncultured marine bacterium		1	0	1
ASV1429	Bacteria	Proteobacteria	Alphaproteobacteria	Rickettsiales	S25-593	uncultured marine bacterium	uncultured marine bacterium		1	1	9
ASV1430	Bacteria	Proteobacteria	Alphaproteobacteria	Rickettsiales	S25-593				1	1	4
ASV1431	Bacteria	Proteobacteria	Alphaproteobacteria	Rickettsiales	S25-593				0	2	2
ASV1432	Bacteria	Proteobacteria	Alphaproteobacteria	Rickettsiales	S25-593				19	23	40
ASV1433	Bacteria	Proteobacteria	Alphaproteobacteria	Rickettsiales	S25-593				0	1	1
ASV1434	Bacteria	Proteobacteria	Alphaproteobacteria	Rickettsiales	S25-593				6	9	20
ASV1435	Bacteria	Proteobacteria	Alphaproteobacteria	Rickettsiales	S25-593				1	4	19
ASV1436	Bacteria	Proteobacteria	Alphaproteobacteria	Rickettsiales	S25-593				6	21	37
ASV1437	Bacteria	Proteobacteria	Alphaproteobacteria	Rickettsiales	S25-593				1	2	8
ASV1438	Bacteria	Proteobacteria	Alphaproteobacteria	Rickettsiales	S25-593				0	0	2
ASV1439	Bacteria	Proteobacteria	Alphaproteobacteria	Rickettsiales	S25-593				1	1	6
ASV1440	Bacteria	Proteobacteria	Alphaproteobacteria	Rickettsiales					32	0	0
ASV1441	Bacteria	Proteobacteria	Alphaproteobacteria	Rickettsiales					6	0	0
ASV1442	Bacteria	Proteobacteria	Alphaproteobacteria	Sphingomonadales	Sphingomonadaceae	Altererythrobacter	Altererythrobacter sp. KYW736		5	0	2
ASV1443	Bacteria	Proteobacteria	Alphaproteobacteria	Sphingomonadales	Sphingomonadaceae	Erythrobacter			0	2	0
ASV1444	Bacteria	Proteobacteria	Alphaproteobacteria	Sphingomonadales	Sphingomonadaceae	Sphingomonas	Sphingomonas yunnanensis		2	0	0
ASV1445	Bacteria	Proteobacteria	Alphaproteobacteria	Sphingomonadales	Sphingomonadaceae	Sphingomonas			1	0	1
ASV1446	Bacteria	Proteobacteria	Alphaproteobacteria	Sphingomonadales	Sphingomonadaceae	Sphingomonas			2	0	0
ASV1447	Bacteria	Proteobacteria	Alphaproteobacteria	Sphingomonadales	Sphingomonadaceae				41	6	0
ASV1448	Bacteria	Proteobacteria	Alphaproteobacteria	Sphingomonadales	Sphingomonadaceae				13	3	0
ASV1449	Bacteria	Proteobacteria	Alphaproteobacteria	Thalassobaculales	Nisaeaceae	OM75 clade	Ambiguous_taxa		0	7	13
ASV1450	Bacteria	Proteobacteria	Alphaproteobacteria	Thalassobaculales	Nisaeaceae	OM75 clade			1	1	0
ASV1451	Bacteria	Proteobacteria	Alphaproteobacteria	Thalassobaculales	Nisaeaceae	OM75 clade			1	1	0
ASV1452	Bacteria	Proteobacteria	Alphaproteobacteria	Thalassobaculales	Nisaeaceae	OM75 clade			4	3	1
ASV1453	Bacteria	Proteobacteria	Alphaproteobacteria	Thalassobaculales	Nisaeaceae	OM75 clade			63	8	18
ASV1454	Bacteria	Proteobacteria	Alphaproteobacteria	Thalassobaculales	uncultured	Ambiguous_taxa	Ambiguous_taxa		0	1	4
ASV1455	Bacteria	Proteobacteria	Alphaproteobacteria	uncultured	Ambiguous_taxa	Ambiguous_taxa	Ambiguous_taxa		9	1	0
ASV1456	Bacteria	Proteobacteria	Alphaproteobacteria	uncultured	uncultured alpha proteobacterium	uncultured alpha proteobacterium	uncultured alpha proteobacterium		2	0	0
ASV1457	Bacteria	Proteobacteria	Alphaproteobacteria	uncultured	uncultured bacterium	uncultured bacterium	uncultured bacterium		0	1	3
ASV1458	Bacteria	Proteobacteria	Alphaproteobacteria	uncultured	uncultured bacterium	uncultured bacterium	uncultured bacterium		4	3	1
ASV1459	Bacteria	Proteobacteria	Alphaproteobacteria	uncultured	uncultured marine bacterium	uncultured marine bacterium	uncultured marine bacterium		0	2	4
ASV1460	Bacteria	Proteobacteria	Alphaproteobacteria	uncultured	uncultured marine bacterium	uncultured marine bacterium	uncultured marine bacterium		3	0	0
ASV1461	Bacteria	Proteobacteria	Alphaproteobacteria	uncultured	uncultured marine bacterium	uncultured marine bacterium	uncultured marine bacterium		6	0	0
ASV1462	Bacteria	Proteobacteria	Alphaproteobacteria	uncultured	uncultured marine bacterium	uncultured marine bacterium	uncultured marine bacterium		1	13	28
ASV1463	Bacteria	Proteobacteria	Alphaproteobacteria	uncultured	uncultured marine bacterium	uncultured marine bacterium	uncultured marine bacterium		10	0	0
ASV1464	Bacteria	Proteobacteria	Alphaproteobacteria	uncultured	unidentified marine bacterioplankton	unidentified marine bacterioplankton	unidentified marine bacterioplankton		0	1	1
ASV1465	Bacteria	Proteobacteria	Alphaproteobacteria	uncultured	unidentified marine bacterioplankton	unidentified marine bacterioplankton	unidentified marine bacterioplankton		0	1	3
ASV1466	Bacteria	Proteobacteria	Alphaproteobacteria	uncultured	unidentified marine bacterioplankton	unidentified marine bacterioplankton	unidentified marine bacterioplankton		0	2	0
ASV1467	Bacteria	Proteobacteria	Alphaproteobacteria	uncultured	unidentified marine bacterioplankton	unidentified marine bacterioplankton	unidentified marine bacterioplankton		2	0	0
ASV1468	Bacteria	Proteobacteria	Alphaproteobacteria	uncultured	unidentified marine bacterioplankton	unidentified marine bacterioplankton	unidentified marine bacterioplankton		0	1	3
ASV1469	Bacteria	Proteobacteria	Alphaproteobacteria	uncultured	unidentified marine bacterioplankton	unidentified marine bacterioplankton	unidentified marine bacterioplankton		108	27	35
ASV1470	Bacteria	Proteobacteria	Alphaproteobacteria	uncultured	unidentified marine bacterioplankton	unidentified marine bacterioplankton	unidentified marine bacterioplankton		0	0	2
ASV1471	Bacteria	Proteobacteria	Alphaproteobacteria	uncultured	unidentified marine bacterioplankton	unidentified marine bacterioplankton	unidentified marine bacterioplankton		0	1	3
ASV1472	Bacteria	Proteobacteria	Alphaproteobacteria	uncultured					2	3	7
ASV1473	Bacteria	Proteobacteria	Alphaproteobacteria	uncultured					0	1	2
ASV1474	Bacteria	Proteobacteria	Alphaproteobacteria	uncultured					4	1	0
ASV1475	Bacteria	Proteobacteria	Alphaproteobacteria	uncultured					1	2	2
ASV1476	Bacteria	Proteobacteria	Alphaproteobacteria	uncultured					4	0	0
ASV1477	Bacteria	Proteobacteria	Alphaproteobacteria	uncultured					0	3	5
ASV1478	Bacteria	Proteobacteria	Alphaproteobacteria	uncultured					38	8	19
ASV1479	Bacteria	Proteobacteria	Alphaproteobacteria	uncultured					0	0	2
ASV1480	Bacteria	Proteobacteria	Alphaproteobacteria	uncultured					0	2	0
ASV1481	Bacteria	Proteobacteria	Alphaproteobacteria	uncultured					1	1	1
ASV1482	Bacteria	Proteobacteria	Alphaproteobacteria	uncultured					0	0	3
ASV1483	Bacteria	Proteobacteria	Alphaproteobacteria						0	2	0
ASV1484	Bacteria	Proteobacteria	Alphaproteobacteria						8	0	0
ASV1485	Bacteria	Proteobacteria	Alphaproteobacteria						1	1	0
ASV1486	Bacteria	Proteobacteria	Alphaproteobacteria						1	1	0
ASV1487	Bacteria	Proteobacteria	Alphaproteobacteria						7	0	0
ASV1488	Bacteria	Proteobacteria	Alphaproteobacteria						1	2	0
ASV1489	Bacteria	Proteobacteria	Alphaproteobacteria						2	0	0
ASV1490	Bacteria	Proteobacteria	Alphaproteobacteria						86	12	6
ASV1491	Bacteria	Proteobacteria	Alphaproteobacteria						1	1	0
ASV1492	Bacteria	Proteobacteria	Alphaproteobacteria						0	2	1
ASV1493	Bacteria	Proteobacteria	Alphaproteobacteria						11	1	1
ASV1494	Bacteria	Proteobacteria	Alphaproteobacteria						1	4	1
ASV1495	Bacteria	Proteobacteria	Alphaproteobacteria						60	37	37
ASV1496	Bacteria	Proteobacteria	Alphaproteobacteria						14	2	0
ASV1497	Bacteria	Proteobacteria	Alphaproteobacteria						1	2	1
ASV1498	Bacteria	Proteobacteria	Alphaproteobacteria						0	2	0
ASV1499	Bacteria	Proteobacteria	Alphaproteobacteria						0	0	3
ASV1500	Bacteria	Proteobacteria	Alphaproteobacteria						2	0	0
ASV1501	Bacteria	Proteobacteria	Alphaproteobacteria						2	4	1
ASV1502	Bacteria	Proteobacteria	Alphaproteobacteria						2	0	0
ASV1503	Bacteria	Proteobacteria	Deltaproteobacteria	Bdellovibrionales	Bacteriovoracaceae	Halobacteriovorax	uncultured bacterium		21	0	0
ASV1504	Bacteria	Proteobacteria	Deltaproteobacteria	Bdellovibrionales	Bacteriovoracaceae	Peredibacter	uncultured Bacteriovorax sp.		31	3	2
ASV1505	Bacteria	Proteobacteria	Deltaproteobacteria	Bdellovibrionales	Bacteriovoracaceae	Peredibacter	uncultured bacterium		36	1	1
ASV1506	Bacteria	Proteobacteria	Deltaproteobacteria	Bdellovibrionales	Bacteriovoracaceae	Peredibacter			5	2	1
ASV1507	Bacteria	Proteobacteria	Deltaproteobacteria	Bdellovibrionales	Bacteriovoracaceae	Peredibacter			3	0	0
ASV1508	Bacteria	Proteobacteria	Deltaproteobacteria	Bdellovibrionales	Bacteriovoracaceae	Peredibacter			7	0	0
ASV1509	Bacteria	Proteobacteria	Deltaproteobacteria	Bdellovibrionales	Bacteriovoracaceae	Peredibacter			4	0	0
ASV1510	Bacteria	Proteobacteria	Deltaproteobacteria	Bdellovibrionales	Bacteriovoracaceae	uncultured	Ambiguous_taxa		2	0	0
ASV1511	Bacteria	Proteobacteria	Deltaproteobacteria	Bdellovibrionales	Bacteriovoracaceae	uncultured	hydrothermal vent metagenome		0	5	4
ASV1512	Bacteria	Proteobacteria	Deltaproteobacteria	Bdellovibrionales	Bacteriovoracaceae	uncultured	uncultured Bacteriovoracaceae bacterium		13	0	2
ASV1513	Bacteria	Proteobacteria	Deltaproteobacteria	Bdellovibrionales	Bacteriovoracaceae	uncultured	uncultured Bacteriovoracaceae bacterium		0	1	2
ASV1514	Bacteria	Proteobacteria	Deltaproteobacteria	Bdellovibrionales	Bacteriovoracaceae	uncultured	uncultured delta proteobacterium		4	0	0
ASV1515	Bacteria	Proteobacteria	Deltaproteobacteria	Bdellovibrionales	Bacteriovoracaceae	uncultured	uncultured delta proteobacterium		16	0	0
ASV1516	Bacteria	Proteobacteria	Deltaproteobacteria	Bdellovibrionales	Bacteriovoracaceae	uncultured	uncultured marine bacterium		1	0	2
ASV1517	Bacteria	Proteobacteria	Deltaproteobacteria	Bdellovibrionales	Bacteriovoracaceae	uncultured	uncultured marine bacterium		5	2	0
ASV1518	Bacteria	Proteobacteria	Deltaproteobacteria	Bdellovibrionales	Bacteriovoracaceae	uncultured	uncultured marine bacterium		2	0	1
ASV1519	Bacteria	Proteobacteria	Deltaproteobacteria	Bdellovibrionales	Bacteriovoracaceae	uncultured			13	1	0
ASV1520	Bacteria	Proteobacteria	Deltaproteobacteria	Bdellovibrionales	Bacteriovoracaceae	uncultured			2	0	1
ASV1521	Bacteria	Proteobacteria	Deltaproteobacteria	Bdellovibrionales	Bacteriovoracaceae	uncultured			3	3	0
ASV1522	Bacteria	Proteobacteria	Deltaproteobacteria	Bdellovibrionales	Bacteriovoracaceae	uncultured			3	1	0
ASV1523	Bacteria	Proteobacteria	Deltaproteobacteria	Bdellovibrionales	Bacteriovoracaceae	uncultured			11	0	8
ASV1524	Bacteria	Proteobacteria	Deltaproteobacteria	Bdellovibrionales	Bacteriovoracaceae	uncultured			13	1	2
ASV1525	Bacteria	Proteobacteria	Deltaproteobacteria	Bdellovibrionales	Bacteriovoracaceae	uncultured			2	0	0
ASV1526	Bacteria	Proteobacteria	Deltaproteobacteria	Bdellovibrionales	Bacteriovoracaceae	uncultured			1	1	0
ASV1527	Bacteria	Proteobacteria	Deltaproteobacteria	Bdellovibrionales	Bacteriovoracaceae	uncultured			2	0	0
ASV1528	Bacteria	Proteobacteria	Deltaproteobacteria	Bdellovibrionales	Bdellovibrionaceae	OM27 clade	Ambiguous_taxa		0	1	7
ASV1529	Bacteria	Proteobacteria	Deltaproteobacteria	Bdellovibrionales	Bdellovibrionaceae	OM27 clade	Ambiguous_taxa		2	0	2
ASV1530	Bacteria	Proteobacteria	Deltaproteobacteria	Bdellovibrionales	Bdellovibrionaceae	OM27 clade	Ambiguous_taxa		0	1	2
ASV1531	Bacteria	Proteobacteria	Deltaproteobacteria	Bdellovibrionales	Bdellovibrionaceae	OM27 clade	metagenome		0	0	2
ASV1532	Bacteria	Proteobacteria	Deltaproteobacteria	Bdellovibrionales	Bdellovibrionaceae	OM27 clade	uncultured bacterium		31	11	5
ASV1533	Bacteria	Proteobacteria	Deltaproteobacteria	Bdellovibrionales	Bdellovibrionaceae	OM27 clade	uncultured bacterium		10	1	0
ASV1534	Bacteria	Proteobacteria	Deltaproteobacteria	Bdellovibrionales	Bdellovibrionaceae	OM27 clade	uncultured bacterium		9	1	0
ASV1535	Bacteria	Proteobacteria	Deltaproteobacteria	Bdellovibrionales	Bdellovibrionaceae	OM27 clade	uncultured bacterium		18	0	1
ASV1536	Bacteria	Proteobacteria	Deltaproteobacteria	Bdellovibrionales	Bdellovibrionaceae	OM27 clade	uncultured bacterium		32	8	2
ASV1537	Bacteria	Proteobacteria	Deltaproteobacteria	Bdellovibrionales	Bdellovibrionaceae	OM27 clade	uncultured bacterium		19	4	2
ASV1538	Bacteria	Proteobacteria	Deltaproteobacteria	Bdellovibrionales	Bdellovibrionaceae	OM27 clade	uncultured delta proteobacterium		2	0	0
ASV1539	Bacteria	Proteobacteria	Deltaproteobacteria	Bdellovibrionales	Bdellovibrionaceae	OM27 clade	uncultured delta proteobacterium		4	0	1
ASV1540	Bacteria	Proteobacteria	Deltaproteobacteria	Bdellovibrionales	Bdellovibrionaceae	OM27 clade	uncultured delta proteobacterium		1	1	3
ASV1541	Bacteria	Proteobacteria	Deltaproteobacteria	Bdellovibrionales	Bdellovibrionaceae	OM27 clade	uncultured delta proteobacterium		13	1	0
ASV1542	Bacteria	Proteobacteria	Deltaproteobacteria	Bdellovibrionales	Bdellovibrionaceae	OM27 clade	uncultured delta proteobacterium		14	3	0
ASV1543	Bacteria	Proteobacteria	Deltaproteobacteria	Bdellovibrionales	Bdellovibrionaceae	OM27 clade	uncultured delta proteobacterium		32	0	1
ASV1544	Bacteria	Proteobacteria	Deltaproteobacteria	Bdellovibrionales	Bdellovibrionaceae	OM27 clade	uncultured delta proteobacterium		1	1	1
ASV1545	Bacteria	Proteobacteria	Deltaproteobacteria	Bdellovibrionales	Bdellovibrionaceae	OM27 clade	uncultured delta proteobacterium		27	1	0
ASV1546	Bacteria	Proteobacteria	Deltaproteobacteria	Bdellovibrionales	Bdellovibrionaceae	OM27 clade	uncultured marine bacterium		5	1	0
ASV1547	Bacteria	Proteobacteria	Deltaproteobacteria	Bdellovibrionales	Bdellovibrionaceae	OM27 clade	uncultured marine bacterium		7	0	0
ASV1548	Bacteria	Proteobacteria	Deltaproteobacteria	Bdellovibrionales	Bdellovibrionaceae	OM27 clade	uncultured marine bacterium		4	9	3
ASV1549	Bacteria	Proteobacteria	Deltaproteobacteria	Bdellovibrionales	Bdellovibrionaceae	OM27 clade	uncultured marine bacterium		4	0	0
ASV1550	Bacteria	Proteobacteria	Deltaproteobacteria	Bdellovibrionales	Bdellovibrionaceae	OM27 clade	uncultured marine bacterium		0	1	1
ASV1551	Bacteria	Proteobacteria	Deltaproteobacteria	Bdellovibrionales	Bdellovibrionaceae	OM27 clade	uncultured marine bacterium		58	7	5
ASV1552	Bacteria	Proteobacteria	Deltaproteobacteria	Bdellovibrionales	Bdellovibrionaceae	OM27 clade	uncultured marine bacterium		0	1	6
ASV1553	Bacteria	Proteobacteria	Deltaproteobacteria	Bdellovibrionales	Bdellovibrionaceae	OM27 clade	uncultured marine bacterium		0	0	3
ASV1554	Bacteria	Proteobacteria	Deltaproteobacteria	Bdellovibrionales	Bdellovibrionaceae	OM27 clade	uncultured marine bacterium		2	0	1
ASV1555	Bacteria	Proteobacteria	Deltaproteobacteria	Bdellovibrionales	Bdellovibrionaceae	OM27 clade	uncultured marine bacterium		0	2	5
ASV1556	Bacteria	Proteobacteria	Deltaproteobacteria	Bdellovibrionales	Bdellovibrionaceae	OM27 clade	uncultured marine bacterium		18	7	4
ASV1557	Bacteria	Proteobacteria	Deltaproteobacteria	Bdellovibrionales	Bdellovibrionaceae	OM27 clade	uncultured marine microorganism		25	12	10
ASV1558	Bacteria	Proteobacteria	Deltaproteobacteria	Bdellovibrionales	Bdellovibrionaceae	OM27 clade	uncultured marine microorganism		9	2	0
ASV1559	Bacteria	Proteobacteria	Deltaproteobacteria	Bdellovibrionales	Bdellovibrionaceae	OM27 clade	uncultured marine microorganism		4	3	1
ASV1560	Bacteria	Proteobacteria	Deltaproteobacteria	Bdellovibrionales	Bdellovibrionaceae	OM27 clade	uncultured marine microorganism		1	1	2
ASV1561	Bacteria	Proteobacteria	Deltaproteobacteria	Bdellovibrionales	Bdellovibrionaceae	OM27 clade	uncultured marine microorganism		4	1	6
ASV1562	Bacteria	Proteobacteria	Deltaproteobacteria	Bdellovibrionales	Bdellovibrionaceae	OM27 clade	uncultured marine microorganism		19	17	11
ASV1563	Bacteria	Proteobacteria	Deltaproteobacteria	Bdellovibrionales	Bdellovibrionaceae	OM27 clade	uncultured marine microorganism		8	0	1
ASV1564	Bacteria	Proteobacteria	Deltaproteobacteria	Bdellovibrionales	Bdellovibrionaceae	OM27 clade	uncultured marine microorganism		1	1	0
ASV1565	Bacteria	Proteobacteria	Deltaproteobacteria	Bdellovibrionales	Bdellovibrionaceae	OM27 clade	uncultured marine microorganism		7	2	0
ASV1566	Bacteria	Proteobacteria	Deltaproteobacteria	Bdellovibrionales	Bdellovibrionaceae	OM27 clade	uncultured proteobacterium		2	0	0
ASV1567	Bacteria	Proteobacteria	Deltaproteobacteria	Bdellovibrionales	Bdellovibrionaceae	OM27 clade	uncultured proteobacterium		5	0	0
ASV1568	Bacteria	Proteobacteria	Deltaproteobacteria	Bdellovibrionales	Bdellovibrionaceae	OM27 clade	unidentified marine bacterioplankton		1	0	1
ASV1569	Bacteria	Proteobacteria	Deltaproteobacteria	Bdellovibrionales	Bdellovibrionaceae	OM27 clade	unidentified marine bacterioplankton		1	2	1
ASV1570	Bacteria	Proteobacteria	Deltaproteobacteria	Bdellovibrionales	Bdellovibrionaceae	OM27 clade	unidentified marine bacterioplankton		24	6	11
ASV1571	Bacteria	Proteobacteria	Deltaproteobacteria	Bdellovibrionales	Bdellovibrionaceae	OM27 clade	unidentified marine bacterioplankton		14	3	2
ASV1572	Bacteria	Proteobacteria	Deltaproteobacteria	Bdellovibrionales	Bdellovibrionaceae	OM27 clade	unidentified marine bacterioplankton		1	1	2
ASV1573	Bacteria	Proteobacteria	Deltaproteobacteria	Bdellovibrionales	Bdellovibrionaceae	OM27 clade			2	0	0
ASV1574	Bacteria	Proteobacteria	Deltaproteobacteria	Bdellovibrionales	Bdellovibrionaceae	OM27 clade			0	0	4
ASV1575	Bacteria	Proteobacteria	Deltaproteobacteria	Bdellovibrionales	Bdellovibrionaceae	OM27 clade			0	0	5
ASV1576	Bacteria	Proteobacteria	Deltaproteobacteria	Bdellovibrionales	Bdellovibrionaceae	OM27 clade			7	0	0
ASV1577	Bacteria	Proteobacteria	Deltaproteobacteria	Bdellovibrionales	Bdellovibrionaceae	OM27 clade			36	8	19
ASV1578	Bacteria	Proteobacteria	Deltaproteobacteria	Bdellovibrionales	Bdellovibrionaceae	OM27 clade			1	0	1
ASV1579	Bacteria	Proteobacteria	Deltaproteobacteria	Bdellovibrionales	Bdellovibrionaceae	OM27 clade			21	0	1
ASV1580	Bacteria	Proteobacteria	Deltaproteobacteria	Bdellovibrionales	Bdellovibrionaceae	OM27 clade			5	0	1
ASV1581	Bacteria	Proteobacteria	Deltaproteobacteria	Bdellovibrionales	Bdellovibrionaceae	OM27 clade			23	10	10
ASV1582	Bacteria	Proteobacteria	Deltaproteobacteria	Bdellovibrionales	Bdellovibrionaceae	OM27 clade			16	4	13
ASV1583	Bacteria	Proteobacteria	Deltaproteobacteria	Bdellovibrionales	Bdellovibrionaceae	OM27 clade			21	5	9
ASV1584	Bacteria	Proteobacteria	Deltaproteobacteria	Bdellovibrionales	Bdellovibrionaceae	OM27 clade			2	4	8
ASV1585	Bacteria	Proteobacteria	Deltaproteobacteria	Bdellovibrionales	Bdellovibrionaceae	OM27 clade			1	1	1
ASV1586	Bacteria	Proteobacteria	Deltaproteobacteria	Bradymonadales	Ambiguous_taxa	Ambiguous_taxa	Ambiguous_taxa		20	0	0
ASV1587	Bacteria	Proteobacteria	Deltaproteobacteria	Bradymonadales	uncultured bacterium	uncultured bacterium	uncultured bacterium		3	0	0
ASV1588	Bacteria	Proteobacteria	Deltaproteobacteria	Bradymonadales	uncultured delta proteobacterium	uncultured delta proteobacterium	uncultured delta proteobacterium		19	3	0
ASV1589	Bacteria	Proteobacteria	Deltaproteobacteria	Bradymonadales	uncultured delta proteobacterium	uncultured delta proteobacterium	uncultured delta proteobacterium		4	0	0
ASV1590	Bacteria	Proteobacteria	Deltaproteobacteria	Bradymonadales	uncultured marine bacterium	uncultured marine bacterium	uncultured marine bacterium		16	0	0
ASV1591	Bacteria	Proteobacteria	Deltaproteobacteria	Bradymonadales	uncultured marine bacterium	uncultured marine bacterium	uncultured marine bacterium		3	1	0
ASV1592	Bacteria	Proteobacteria	Deltaproteobacteria	Desulfobacterales	Desulfobacteraceae	Desulfobacter			0	2	0
ASV1593	Bacteria	Proteobacteria	Deltaproteobacteria	Desulfobacterales	Desulfobacteraceae	Sva0081 sediment group			2	0	0
ASV1594	Bacteria	Proteobacteria	Deltaproteobacteria	Desulfobacterales	Desulfobacteraceae	Sva0081 sediment group			2	0	0
ASV1595	Bacteria	Proteobacteria	Deltaproteobacteria	Desulfobacterales	Desulfobulbaceae	Desulfotalea	uncultured delta proteobacterium		0	2	0
ASV1596	Bacteria	Proteobacteria	Deltaproteobacteria	Desulfobacterales	Desulfobulbaceae	uncultured	Ambiguous_taxa		2	0	0
ASV1597	Bacteria	Proteobacteria	Deltaproteobacteria	Desulfobacterales	Desulfobulbaceae	uncultured	uncultured Desulfobulbaceae bacterium		2	0	0
ASV1598	Bacteria	Proteobacteria	Deltaproteobacteria	Desulfobacterales	Desulfobulbaceae	uncultured	uncultured Desulfobulbaceae bacterium		9	0	0
ASV1599	Bacteria	Proteobacteria	Deltaproteobacteria	Desulfobacterales	Desulfobulbaceae	uncultured	uncultured Desulfobulbaceae bacterium		1	1	1
ASV1600	Bacteria	Proteobacteria	Deltaproteobacteria	Desulfobacterales	Desulfobulbaceae	uncultured	uncultured Desulfobulbaceae bacterium		3	0	0
ASV1601	Bacteria	Proteobacteria	Deltaproteobacteria	Desulfobacterales	Desulfobulbaceae	uncultured			6	0	0
ASV1602	Bacteria	Proteobacteria	Deltaproteobacteria	Desulfovibrionales	Desulfovibrionaceae	Halodesulfovibrio	Ambiguous_taxa		8	4	3
ASV1603	Bacteria	Proteobacteria	Deltaproteobacteria	Desulfovibrionales	Desulfovibrionaceae	Halodesulfovibrio	uncultured bacterium		5	0	0
ASV1604	Bacteria	Proteobacteria	Deltaproteobacteria	Desulfovibrionales	Desulfovibrionaceae	Halodesulfovibrio	uncultured marine bacterium		0	2	0
ASV1605	Bacteria	Proteobacteria	Deltaproteobacteria	Desulfovibrionales	Desulfovibrionaceae				4	1	0
ASV1606	Bacteria	Proteobacteria	Deltaproteobacteria	Myxococcales	Blfdi19	uncultured bacterium	uncultured bacterium		7	0	0
ASV1607	Bacteria	Proteobacteria	Deltaproteobacteria	Myxococcales	Blfdi19	uncultured bacterium	uncultured bacterium		2	0	0
ASV1608	Bacteria	Proteobacteria	Deltaproteobacteria	Myxococcales	Blfdi19	uncultured bacterium	uncultured bacterium		31	0	0
ASV1609	Bacteria	Proteobacteria	Deltaproteobacteria	Myxococcales	Nannocystaceae	uncultured			7	0	0
ASV1610	Bacteria	Proteobacteria	Deltaproteobacteria	Myxococcales	Nannocystaceae	uncultured			20	0	0
ASV1611	Bacteria	Proteobacteria	Deltaproteobacteria	Myxococcales	P3OB-42	Ambiguous_taxa	Ambiguous_taxa		20	2	4
ASV1612	Bacteria	Proteobacteria	Deltaproteobacteria	Myxococcales	P3OB-42	uncultured bacterium	uncultured bacterium		92	8	19
ASV1613	Bacteria	Proteobacteria	Deltaproteobacteria	Myxococcales	P3OB-42				6	0	2
ASV1614	Bacteria	Proteobacteria	Deltaproteobacteria	Myxococcales	P3OB-42				3	1	10
ASV1615	Bacteria	Proteobacteria	Deltaproteobacteria	Myxococcales	P3OB-42				3	0	0
ASV1616	Bacteria	Proteobacteria	Deltaproteobacteria	Myxococcales	Sandaracinaceae	uncultured	marine metagenome		2	0	0
ASV1617	Bacteria	Proteobacteria	Deltaproteobacteria	Myxococcales	Sandaracinaceae	uncultured			5	1	0
ASV1618	Bacteria	Proteobacteria	Deltaproteobacteria	NB1-j	uncultured organism	uncultured organism	uncultured organism		3	0	0
ASV1619	Bacteria	Proteobacteria	Deltaproteobacteria	NB1-j	uncultured organism	uncultured organism	uncultured organism		9	3	1
ASV1620	Bacteria	Proteobacteria	Deltaproteobacteria	Oligoflexales	0319-6G20	uncultured organism	uncultured organism		3	2	0
ASV1621	Bacteria	Proteobacteria	Deltaproteobacteria	Oligoflexales	0319-6G20	uncultured Roseobacter sp.	uncultured Roseobacter sp.		6	0	0
ASV1622	Bacteria	Proteobacteria	Deltaproteobacteria	Oligoflexales	053A03-B-DI-P58	uncultured marine bacterium	uncultured marine bacterium		6	0	0
ASV1623	Bacteria	Proteobacteria	Deltaproteobacteria	Oligoflexales	Oligoflexaceae	Pseudobacteriovorax	uncultured bacterium		3	0	0
ASV1624	Bacteria	Proteobacteria	Deltaproteobacteria	Oligoflexales	Oligoflexaceae	Pseudobacteriovorax	uncultured delta proteobacterium		1	1	0
ASV1625	Bacteria	Proteobacteria	Deltaproteobacteria	Oligoflexales	Oligoflexaceae	Pseudobacteriovorax	uncultured delta proteobacterium		4	0	0
ASV1626	Bacteria	Proteobacteria	Deltaproteobacteria	Oligoflexales	Oligoflexaceae	Pseudobacteriovorax	uncultured delta proteobacterium		33	1	0
ASV1627	Bacteria	Proteobacteria	Deltaproteobacteria	Oligoflexales	Oligoflexaceae	uncultured	metagenome		9	0	0
ASV1628	Bacteria	Proteobacteria	Deltaproteobacteria	Oligoflexales	Oligoflexaceae	uncultured	uncultured bacterium		58	9	4
ASV1629	Bacteria	Proteobacteria	Deltaproteobacteria	Oligoflexales	Oligoflexaceae	uncultured	uncultured bacterium		1	2	0
ASV1630	Bacteria	Proteobacteria	Deltaproteobacteria	Oligoflexales	Oligoflexaceae	uncultured	uncultured bacterium		0	0	4
ASV1631	Bacteria	Proteobacteria	Deltaproteobacteria	Oligoflexales	Oligoflexaceae	uncultured	uncultured delta proteobacterium		2	2	0
ASV1632	Bacteria	Proteobacteria	Deltaproteobacteria	Oligoflexales	Oligoflexaceae	uncultured	uncultured marine bacterium		6	1	1
ASV1633	Bacteria	Proteobacteria	Deltaproteobacteria	Oligoflexales	Oligoflexaceae	uncultured	uncultured marine bacterium		0	1	1
ASV1634	Bacteria	Proteobacteria	Deltaproteobacteria	Oligoflexales	Oligoflexaceae	uncultured	uncultured marine bacterium		3	0	0
ASV1635	Bacteria	Proteobacteria	Deltaproteobacteria	Oligoflexales	Oligoflexaceae	uncultured	uncultured proteobacterium		34	5	1
ASV1636	Bacteria	Proteobacteria	Deltaproteobacteria	Oligoflexales	Oligoflexaceae	uncultured			4	0	0
ASV1637	Bacteria	Proteobacteria	Deltaproteobacteria	Oligoflexales	Oligoflexaceae	uncultured			0	0	2
ASV1638	Bacteria	Proteobacteria	Deltaproteobacteria	Oligoflexales	Oligoflexaceae	uncultured			22	5	3
ASV1639	Bacteria	Proteobacteria	Deltaproteobacteria	PB19	Ambiguous_taxa	Ambiguous_taxa	Ambiguous_taxa		3	0	0
ASV1640	Bacteria	Proteobacteria	Deltaproteobacteria	PB19	Ambiguous_taxa	Ambiguous_taxa	Ambiguous_taxa		0	1	4
ASV1641	Bacteria	Proteobacteria	Deltaproteobacteria	PB19	Ambiguous_taxa	Ambiguous_taxa	Ambiguous_taxa		0	2	1
ASV1642	Bacteria	Proteobacteria	Deltaproteobacteria	PB19	Ambiguous_taxa	Ambiguous_taxa	Ambiguous_taxa		0	0	2
ASV1643	Bacteria	Proteobacteria	Deltaproteobacteria	PB19	Ambiguous_taxa	Ambiguous_taxa	Ambiguous_taxa		0	2	3
ASV1644	Bacteria	Proteobacteria	Deltaproteobacteria	PB19	Ambiguous_taxa	Ambiguous_taxa	Ambiguous_taxa		5	0	1
ASV1645	Bacteria	Proteobacteria	Deltaproteobacteria	PB19	Ambiguous_taxa	Ambiguous_taxa	Ambiguous_taxa		0	0	2
ASV1646	Bacteria	Proteobacteria	Deltaproteobacteria	PB19	Ambiguous_taxa	Ambiguous_taxa	Ambiguous_taxa		15	3	0
ASV1647	Bacteria	Proteobacteria	Deltaproteobacteria	PB19	Ambiguous_taxa	Ambiguous_taxa	Ambiguous_taxa		10	0	0
ASV1648	Bacteria	Proteobacteria	Deltaproteobacteria	PB19	Ambiguous_taxa	Ambiguous_taxa	Ambiguous_taxa		15	1	2
ASV1649	Bacteria	Proteobacteria	Deltaproteobacteria	PB19	Ambiguous_taxa	Ambiguous_taxa	Ambiguous_taxa		39	3	1
ASV1650	Bacteria	Proteobacteria	Deltaproteobacteria	PB19	uncultured bacterium	uncultured bacterium	uncultured bacterium		1	3	1
ASV1651	Bacteria	Proteobacteria	Deltaproteobacteria	PB19	uncultured bacterium	uncultured bacterium	uncultured bacterium		12	1	2
ASV1652	Bacteria	Proteobacteria	Deltaproteobacteria	PB19	uncultured bacterium	uncultured bacterium	uncultured bacterium		7	0	0
ASV1653	Bacteria	Proteobacteria	Deltaproteobacteria	PB19	uncultured bacterium	uncultured bacterium	uncultured bacterium		5	1	0
ASV1654	Bacteria	Proteobacteria	Deltaproteobacteria	PB19	uncultured delta proteobacterium	uncultured delta proteobacterium	uncultured delta proteobacterium		2	1	2
ASV1655	Bacteria	Proteobacteria	Deltaproteobacteria	PB19	uncultured delta proteobacterium	uncultured delta proteobacterium	uncultured delta proteobacterium		2	0	1
ASV1656	Bacteria	Proteobacteria	Deltaproteobacteria	PB19	uncultured delta proteobacterium	uncultured delta proteobacterium	uncultured delta proteobacterium		0	1	2
ASV1657	Bacteria	Proteobacteria	Deltaproteobacteria	PB19	uncultured marine bacterium	uncultured marine bacterium	uncultured marine bacterium		0	2	3
ASV1658	Bacteria	Proteobacteria	Deltaproteobacteria	PB19	uncultured marine bacterium	uncultured marine bacterium	uncultured marine bacterium		8	0	1
ASV1659	Bacteria	Proteobacteria	Deltaproteobacteria	PB19	uncultured marine bacterium	uncultured marine bacterium	uncultured marine bacterium		7	2	0
ASV1660	Bacteria	Proteobacteria	Deltaproteobacteria	PB19	uncultured marine bacterium	uncultured marine bacterium	uncultured marine bacterium		0	0	2
ASV1661	Bacteria	Proteobacteria	Deltaproteobacteria	PB19	uncultured marine microorganism	uncultured marine microorganism	uncultured marine microorganism		24	15	15
ASV1662	Bacteria	Proteobacteria	Deltaproteobacteria	PB19					12	0	0
ASV1663	Bacteria	Proteobacteria	Deltaproteobacteria	PB19					1	1	1
ASV1664	Bacteria	Proteobacteria	Deltaproteobacteria	PB19					2	0	0
ASV1665	Bacteria	Proteobacteria	Deltaproteobacteria	PB19					4	0	0
ASV1666	Bacteria	Proteobacteria	Deltaproteobacteria	PB19					0	1	10
ASV1667	Bacteria	Proteobacteria	Deltaproteobacteria	PB19					1	1	0
ASV1668	Bacteria	Proteobacteria	Deltaproteobacteria	PB19					3	0	0
ASV1669	Bacteria	Proteobacteria	Deltaproteobacteria	PB19					4	0	1
ASV1670	Bacteria	Proteobacteria	Deltaproteobacteria	PB19					0	1	2
ASV1671	Bacteria	Proteobacteria	Deltaproteobacteria	PB19					4	0	0
ASV1672	Bacteria	Proteobacteria	Deltaproteobacteria	PB19					4	1	1
ASV1673	Bacteria	Proteobacteria	Deltaproteobacteria	PB19					12	0	1
ASV1674	Bacteria	Proteobacteria	Deltaproteobacteria	PB19					3	0	2
ASV1675	Bacteria	Proteobacteria	Deltaproteobacteria	PB19					2	1	0
ASV1676	Bacteria	Proteobacteria	Deltaproteobacteria	PB19					2	1	1
ASV1677	Bacteria	Proteobacteria	Deltaproteobacteria	PB19					12	3	0
ASV1678	Bacteria	Proteobacteria	Deltaproteobacteria	PB19					10	0	0
ASV1679	Bacteria	Proteobacteria	Deltaproteobacteria	PB19					0	0	2
ASV1680	Bacteria	Proteobacteria	Deltaproteobacteria	PB19					0	4	15
ASV1681	Bacteria	Proteobacteria	Deltaproteobacteria	PB19					11	0	3
ASV1682	Bacteria	Proteobacteria	Deltaproteobacteria	PB19					13	2	5
ASV1683	Bacteria	Proteobacteria	Deltaproteobacteria	PB19					13	3	0
ASV1684	Bacteria	Proteobacteria	Deltaproteobacteria	SAR324 clade(Marine group B)	Ambiguous_taxa	Ambiguous_taxa	Ambiguous_taxa		24	23	40
ASV1685	Bacteria	Proteobacteria	Deltaproteobacteria	SAR324 clade(Marine group B)	metagenome	metagenome	metagenome		15	0	1
ASV1686	Bacteria	Proteobacteria	Deltaproteobacteria	SAR324 clade(Marine group B)	uncultured bacterium	uncultured bacterium	uncultured bacterium		10	1	0
ASV1687	Bacteria	Proteobacteria	Deltaproteobacteria	SAR324 clade(Marine group B)	uncultured marine bacterium	uncultured marine bacterium	uncultured marine bacterium		1	3	9
ASV1688	Bacteria	Proteobacteria	Deltaproteobacteria	SAR324 clade(Marine group B)	uncultured marine bacterium	uncultured marine bacterium	uncultured marine bacterium		106	19	27
ASV1689	Bacteria	Proteobacteria	Deltaproteobacteria	Syntrophobacterales	Syntrophobacteraceae	uncultured	uncultured bacterium		3	0	0
ASV1690	Bacteria	Proteobacteria	Deltaproteobacteria	Syntrophobacterales	Syntrophobacteraceae	uncultured			3	0	0
ASV1691	Bacteria	Proteobacteria	Deltaproteobacteria						0	0	4
ASV1692	Bacteria	Proteobacteria	Deltaproteobacteria						14	2	10
ASV1693	Bacteria	Proteobacteria	Deltaproteobacteria						12	1	8
ASV1694	Bacteria	Proteobacteria	Gammaproteobacteria	Alteromonadales	Alteromonadaceae	Aestuariibacter			6	3	1
ASV1695	Bacteria	Proteobacteria	Gammaproteobacteria	Alteromonadales	Alteromonadaceae	Alteromonas			1	0	1
ASV1696	Bacteria	Proteobacteria	Gammaproteobacteria	Alteromonadales	Alteromonadaceae	uncultured			0	3	1
ASV1697	Bacteria	Proteobacteria	Gammaproteobacteria	Alteromonadales	Alteromonadaceae				2	1	0
ASV1698	Bacteria	Proteobacteria	Gammaproteobacteria	Alteromonadales	Alteromonadaceae				11	1	1
ASV1699	Bacteria	Proteobacteria	Gammaproteobacteria	Alteromonadales	Colwelliaceae	Thalassotalea	Ambiguous_taxa		6	2	1
ASV1700	Bacteria	Proteobacteria	Gammaproteobacteria	Alteromonadales	Colwelliaceae	Thalassotalea	Thalassotalea ganghwensis		3	1	0
ASV1701	Bacteria	Proteobacteria	Gammaproteobacteria	Alteromonadales	Colwelliaceae	Thalassotalea	uncultured bacterium		5	1	1
ASV1702	Bacteria	Proteobacteria	Gammaproteobacteria	Alteromonadales	Colwelliaceae	Thalassotalea			1	1	1
ASV1703	Bacteria	Proteobacteria	Gammaproteobacteria	Alteromonadales	Colwelliaceae	Thalassotalea			0	2	0
ASV1704	Bacteria	Proteobacteria	Gammaproteobacteria	Alteromonadales	Moritellaceae	Paramoritella	Paramoritella alkaliphila		3	0	0
ASV1705	Bacteria	Proteobacteria	Gammaproteobacteria	Alteromonadales	Pseudoalteromonadaceae	Algicola	uncultured gamma proteobacterium		2	3	0
ASV1706	Bacteria	Proteobacteria	Gammaproteobacteria	Alteromonadales	Pseudoalteromonadaceae	Pseudoalteromonas			3	1	1
ASV1707	Bacteria	Proteobacteria	Gammaproteobacteria	Alteromonadales	Pseudoalteromonadaceae	Pseudoalteromonas			1	1	0
ASV1708	Bacteria	Proteobacteria	Gammaproteobacteria	Alteromonadales	Pseudoalteromonadaceae				2	0	0
ASV1709	Bacteria	Proteobacteria	Gammaproteobacteria	Alteromonadales	Psychromonadaceae				1	1	0
ASV1710	Bacteria	Proteobacteria	Gammaproteobacteria	Alteromonadales	Psychromonadaceae				1	4	1
ASV1711	Bacteria	Proteobacteria	Gammaproteobacteria	Alteromonadales	Shewanellaceae	Shewanella	Shewanella sp. MEBiC05444T		0	1	1
ASV1712	Bacteria	Proteobacteria	Gammaproteobacteria	Alteromonadales	Shewanellaceae	Shewanella			0	2	1
ASV1713	Bacteria	Proteobacteria	Gammaproteobacteria	Alteromonadales	Shewanellaceae	Shewanella			1	1	0
ASV1714	Bacteria	Proteobacteria	Gammaproteobacteria	Alteromonadales	Shewanellaceae				3	0	0
ASV1715	Bacteria	Proteobacteria	Gammaproteobacteria	Alteromonadales	uncultured	uncultured bacterium	uncultured bacterium		0	1	1
ASV1716	Bacteria	Proteobacteria	Gammaproteobacteria	Alteromonadales					0	0	2
ASV1717	Bacteria	Proteobacteria	Gammaproteobacteria	Arenicellales	Arenicellaceae	Arenicella	uncultured bacterium		1	1	0
ASV1718	Bacteria	Proteobacteria	Gammaproteobacteria	Arenicellales	Arenicellaceae	Arenicella	uncultured bacterium		0	1	1
ASV1719	Bacteria	Proteobacteria	Gammaproteobacteria	Arenicellales	Arenicellaceae	Arenicella	uncultured bacterium		1	1	2
ASV1720	Bacteria	Proteobacteria	Gammaproteobacteria	Arenicellales	Arenicellaceae	Perspicuibacter			3	1	0
ASV1721	Bacteria	Proteobacteria	Gammaproteobacteria	Arenicellales	Arenicellaceae	Perspicuibacter			0	1	1
ASV1722	Bacteria	Proteobacteria	Gammaproteobacteria	Arenicellales	Arenicellaceae	uncultured	uncultured bacterium		0	2	0
ASV1723	Bacteria	Proteobacteria	Gammaproteobacteria	BD7-8	uncultured bacterium	uncultured bacterium	uncultured bacterium		3	0	0
ASV1724	Bacteria	Proteobacteria	Gammaproteobacteria	BD7-8					1	2	0
ASV1725	Bacteria	Proteobacteria	Gammaproteobacteria	Betaproteobacteriales	Burkholderiaceae	Burkholderia-Caballeronia-Paraburkholderia	Paraburkholderia tropica		2	0	0
ASV1726	Bacteria	Proteobacteria	Gammaproteobacteria	Betaproteobacteriales	Burkholderiaceae	Burkholderia-Caballeronia-Paraburkholderia			2	0	1
ASV1727	Bacteria	Proteobacteria	Gammaproteobacteria	Betaproteobacteriales	Burkholderiaceae	Burkholderia-Caballeronia-Paraburkholderia			4	4	3
ASV1728	Bacteria	Proteobacteria	Gammaproteobacteria	Betaproteobacteriales	Burkholderiaceae	MWH-UniP1 aquatic group			0	0	3
ASV1729	Bacteria	Proteobacteria	Gammaproteobacteria	Betaproteobacteriales	Burkholderiaceae	MWH-UniP1 aquatic group			30	10	16
ASV1730	Bacteria	Proteobacteria	Gammaproteobacteria	Betaproteobacteriales	Burkholderiaceae	MWH-UniP1 aquatic group			0	1	2
ASV1731	Bacteria	Proteobacteria	Gammaproteobacteria	Betaproteobacteriales	Burkholderiaceae	MWH-UniP1 aquatic group			0	1	4
ASV1732	Bacteria	Proteobacteria	Gammaproteobacteria	Betaproteobacteriales	Burkholderiaceae	RS62 marine group	uncultured bacterium		1	0	1
ASV1733	Bacteria	Proteobacteria	Gammaproteobacteria	Betaproteobacteriales	Burkholderiaceae	RS62 marine group	uncultured Comamonadaceae bacterium		2	0	0
ASV1734	Bacteria	Proteobacteria	Gammaproteobacteria	Betaproteobacteriales	Burkholderiaceae				1	1	0
ASV1735	Bacteria	Proteobacteria	Gammaproteobacteria	Betaproteobacteriales	Methylophilaceae	OM43 clade			120	35	27
ASV1736	Bacteria	Proteobacteria	Gammaproteobacteria	Betaproteobacteriales	Nitrosomonadaceae	IS-44	uncultured beta proteobacterium		4	0	0
ASV1737	Bacteria	Proteobacteria	Gammaproteobacteria	Betaproteobacteriales	Nitrosomonadaceae	mle1-7	Ambiguous_taxa		0	1	2
ASV1738	Bacteria	Proteobacteria	Gammaproteobacteria	Betaproteobacteriales	Nitrosomonadaceae	mle1-7	Ambiguous_taxa		5	0	0
ASV1739	Bacteria	Proteobacteria	Gammaproteobacteria	Betaproteobacteriales	Nitrosomonadaceae	mle1-7	Ambiguous_taxa		9	0	0
ASV1740	Bacteria	Proteobacteria	Gammaproteobacteria	Betaproteobacteriales	Nitrosomonadaceae	mle1-7	Ambiguous_taxa		3	2	7
ASV1741	Bacteria	Proteobacteria	Gammaproteobacteria	Betaproteobacteriales	Nitrosomonadaceae	mle1-7	Ambiguous_taxa		43	2	1
ASV1742	Bacteria	Proteobacteria	Gammaproteobacteria	Betaproteobacteriales	Nitrosomonadaceae	mle1-7	Ambiguous_taxa		2	2	0
ASV1743	Bacteria	Proteobacteria	Gammaproteobacteria	Betaproteobacteriales	Nitrosomonadaceae	mle1-7	Ambiguous_taxa		14	6	1
ASV1744	Bacteria	Proteobacteria	Gammaproteobacteria	Betaproteobacteriales	Rhodocyclaceae	C39			2	0	0
ASV1745	Bacteria	Proteobacteria	Gammaproteobacteria	Betaproteobacteriales					0	2	3
ASV1746	Bacteria	Proteobacteria	Gammaproteobacteria	Cellvibrionales	BD2-7	uncultured bacterium	uncultured bacterium		1	1	0
ASV1747	Bacteria	Proteobacteria	Gammaproteobacteria	Cellvibrionales	Cellvibrionaceae	Aestuariicella	uncultured bacterium		3	5	0
ASV1748	Bacteria	Proteobacteria	Gammaproteobacteria	Cellvibrionales	Cellvibrionaceae	Marinagarivorans	uncultured bacterium		0	1	1
ASV1749	Bacteria	Proteobacteria	Gammaproteobacteria	Cellvibrionales	Cellvibrionaceae	Marinagarivorans	uncultured bacterium		2	1	0
ASV1750	Bacteria	Proteobacteria	Gammaproteobacteria	Cellvibrionales	Cellvibrionaceae	Marinagarivorans	uncultured bacterium		2	0	1
ASV1751	Bacteria	Proteobacteria	Gammaproteobacteria	Cellvibrionales	Cellvibrionaceae	Marinagarivorans	uncultured bacterium		1	2	0
ASV1752	Bacteria	Proteobacteria	Gammaproteobacteria	Cellvibrionales	Cellvibrionaceae	Marinagarivorans	uncultured bacterium		2	0	0
ASV1753	Bacteria	Proteobacteria	Gammaproteobacteria	Cellvibrionales	Cellvibrionaceae	Marinagarivorans			1	1	0
ASV1754	Bacteria	Proteobacteria	Gammaproteobacteria	Cellvibrionales	Cellvibrionaceae	Marinagarivorans			1	0	1
ASV1755	Bacteria	Proteobacteria	Gammaproteobacteria	Cellvibrionales	Cellvibrionaceae	Umboniibacter	uncultured bacterium		3	0	0
ASV1756	Bacteria	Proteobacteria	Gammaproteobacteria	Cellvibrionales	Cellvibrionaceae	uncultured	uncultured bacterium		1	1	0
ASV1757	Bacteria	Proteobacteria	Gammaproteobacteria	Cellvibrionales	Cellvibrionaceae	uncultured	uncultured gamma proteobacterium		1	3	0
ASV1758	Bacteria	Proteobacteria	Gammaproteobacteria	Cellvibrionales	Cellvibrionaceae	uncultured			1	1	1
ASV1759	Bacteria	Proteobacteria	Gammaproteobacteria	Cellvibrionales	Cellvibrionaceae	uncultured bacterium	uncultured bacterium		3	0	0
ASV1760	Bacteria	Proteobacteria	Gammaproteobacteria	Cellvibrionales	Cellvibrionaceae				1	0	1
ASV1761	Bacteria	Proteobacteria	Gammaproteobacteria	Cellvibrionales	Halieaceae	Luminiphilus			97	14	4
ASV1762	Bacteria	Proteobacteria	Gammaproteobacteria	Cellvibrionales	Halieaceae	Luminiphilus			20	3	2
ASV1763	Bacteria	Proteobacteria	Gammaproteobacteria	Cellvibrionales	Halieaceae	Luminiphilus			4	1	1
ASV1764	Bacteria	Proteobacteria	Gammaproteobacteria	Cellvibrionales	Halieaceae	OM60(NOR5) clade	Ambiguous_taxa		67	6	0
ASV1765	Bacteria	Proteobacteria	Gammaproteobacteria	Cellvibrionales	Halieaceae	OM60(NOR5) clade	Ambiguous_taxa		77	12	4
ASV1766	Bacteria	Proteobacteria	Gammaproteobacteria	Cellvibrionales	Halieaceae	OM60(NOR5) clade	Ambiguous_taxa		2	0	0
ASV1767	Bacteria	Proteobacteria	Gammaproteobacteria	Cellvibrionales	Halieaceae	OM60(NOR5) clade	Ambiguous_taxa		6	1	1
ASV1768	Bacteria	Proteobacteria	Gammaproteobacteria	Cellvibrionales	Halieaceae	OM60(NOR5) clade	Ambiguous_taxa		50	9	1
ASV1769	Bacteria	Proteobacteria	Gammaproteobacteria	Cellvibrionales	Halieaceae	OM60(NOR5) clade	Ambiguous_taxa		109	40	33
ASV1770	Bacteria	Proteobacteria	Gammaproteobacteria	Cellvibrionales	Halieaceae	OM60(NOR5) clade	uncultured Glaciecola sp.		0	1	1
ASV1771	Bacteria	Proteobacteria	Gammaproteobacteria	Cellvibrionales	Halieaceae	OM60(NOR5) clade			25	2	1
ASV1772	Bacteria	Proteobacteria	Gammaproteobacteria	Cellvibrionales	Halieaceae	OM60(NOR5) clade			119	38	35
ASV1773	Bacteria	Proteobacteria	Gammaproteobacteria	Cellvibrionales	Halieaceae	OM60(NOR5) clade			21	0	0
ASV1774	Bacteria	Proteobacteria	Gammaproteobacteria	Cellvibrionales	Halieaceae	OM60(NOR5) clade			0	1	2
ASV1775	Bacteria	Proteobacteria	Gammaproteobacteria	Cellvibrionales	Halieaceae	OM60(NOR5) clade			77	40	35
ASV1776	Bacteria	Proteobacteria	Gammaproteobacteria	Cellvibrionales	Halieaceae	OM60(NOR5) clade			0	0	2
ASV1777	Bacteria	Proteobacteria	Gammaproteobacteria	Cellvibrionales	Halieaceae				0	3	0
ASV1778	Bacteria	Proteobacteria	Gammaproteobacteria	Cellvibrionales	Halieaceae				1	0	1
ASV1779	Bacteria	Proteobacteria	Gammaproteobacteria	Cellvibrionales	Halieaceae				5	0	1
ASV1780	Bacteria	Proteobacteria	Gammaproteobacteria	Cellvibrionales	Porticoccaceae	Porticoccus	uncultured bacterium		3	0	0
ASV1781	Bacteria	Proteobacteria	Gammaproteobacteria	Cellvibrionales	Porticoccaceae	SAR92 clade	uncultured bacterium		3	16	38
ASV1782	Bacteria	Proteobacteria	Gammaproteobacteria	Cellvibrionales	Porticoccaceae	SAR92 clade			32	12	11
ASV1783	Bacteria	Proteobacteria	Gammaproteobacteria	Cellvibrionales	Spongiibacteraceae	BD1-7 clade	uncultured gamma proteobacterium		6	0	0
ASV1784	Bacteria	Proteobacteria	Gammaproteobacteria	Cellvibrionales	Spongiibacteraceae	BD1-7 clade	uncultured gamma proteobacterium		0	1	2
ASV1785	Bacteria	Proteobacteria	Gammaproteobacteria	Cellvibrionales	Spongiibacteraceae	BD1-7 clade	uncultured gamma proteobacterium		5	1	2
ASV1786	Bacteria	Proteobacteria	Gammaproteobacteria	Cellvibrionales	Spongiibacteraceae	BD1-7 clade			2	0	1
ASV1787	Bacteria	Proteobacteria	Gammaproteobacteria	Cellvibrionales	Spongiibacteraceae	BD1-7 clade			4	0	1
ASV1788	Bacteria	Proteobacteria	Gammaproteobacteria	Cellvibrionales	Spongiibacteraceae	BD1-7 clade			1	1	0
ASV1789	Bacteria	Proteobacteria	Gammaproteobacteria	Coxiellales	Coxiellaceae	Coxiella	Ambiguous_taxa		6	1	8
ASV1790	Bacteria	Proteobacteria	Gammaproteobacteria	Coxiellales	Coxiellaceae	Coxiella	Ambiguous_taxa		0	2	3
ASV1791	Bacteria	Proteobacteria	Gammaproteobacteria	Coxiellales	Coxiellaceae	Coxiella	Ambiguous_taxa		28	3	6
ASV1792	Bacteria	Proteobacteria	Gammaproteobacteria	Coxiellales	Coxiellaceae	Coxiella	Ambiguous_taxa		0	1	1
ASV1793	Bacteria	Proteobacteria	Gammaproteobacteria	Coxiellales	Coxiellaceae	Coxiella	Ambiguous_taxa		0	0	2
ASV1794	Bacteria	Proteobacteria	Gammaproteobacteria	Coxiellales	Coxiellaceae	Coxiella	metagenome		11	2	0
ASV1795	Bacteria	Proteobacteria	Gammaproteobacteria	Coxiellales	Coxiellaceae	Coxiella	metagenome		6	0	0
ASV1796	Bacteria	Proteobacteria	Gammaproteobacteria	Coxiellales	Coxiellaceae	Coxiella	uncultured bacterium		1	0	2
ASV1797	Bacteria	Proteobacteria	Gammaproteobacteria	Coxiellales	Coxiellaceae	Coxiella	uncultured bacterium		1	2	1
ASV1798	Bacteria	Proteobacteria	Gammaproteobacteria	Coxiellales	Coxiellaceae	Coxiella	uncultured bacterium		13	1	0
ASV1799	Bacteria	Proteobacteria	Gammaproteobacteria	Coxiellales	Coxiellaceae	Coxiella	uncultured bacterium		2	1	2
ASV1800	Bacteria	Proteobacteria	Gammaproteobacteria	Coxiellales	Coxiellaceae	Coxiella	uncultured bacterium		2	0	0
ASV1801	Bacteria	Proteobacteria	Gammaproteobacteria	Coxiellales	Coxiellaceae	Coxiella	uncultured bacterium		0	2	0
ASV1802	Bacteria	Proteobacteria	Gammaproteobacteria	Coxiellales	Coxiellaceae	Coxiella	uncultured bacterium		2	3	6
ASV1803	Bacteria	Proteobacteria	Gammaproteobacteria	Coxiellales	Coxiellaceae	Coxiella	uncultured bacterium		6	0	0
ASV1804	Bacteria	Proteobacteria	Gammaproteobacteria	Coxiellales	Coxiellaceae	Coxiella	uncultured bacterium		0	1	1
ASV1805	Bacteria	Proteobacteria	Gammaproteobacteria	Coxiellales	Coxiellaceae	Coxiella	uncultured bacterium		1	0	3
ASV1806	Bacteria	Proteobacteria	Gammaproteobacteria	Coxiellales	Coxiellaceae	Coxiella	uncultured bacterium		0	1	1
ASV1807	Bacteria	Proteobacteria	Gammaproteobacteria	Coxiellales	Coxiellaceae	Coxiella	uncultured bacterium		0	1	3
ASV1808	Bacteria	Proteobacteria	Gammaproteobacteria	Coxiellales	Coxiellaceae	Coxiella	uncultured bacterium		2	0	0
ASV1809	Bacteria	Proteobacteria	Gammaproteobacteria	Coxiellales	Coxiellaceae	Coxiella	uncultured bacterium		0	0	2
ASV1810	Bacteria	Proteobacteria	Gammaproteobacteria	Coxiellales	Coxiellaceae	Coxiella	uncultured bacterium		11	1	0
ASV1811	Bacteria	Proteobacteria	Gammaproteobacteria	Coxiellales	Coxiellaceae	Coxiella	uncultured bacterium		0	2	2
ASV1812	Bacteria	Proteobacteria	Gammaproteobacteria	Coxiellales	Coxiellaceae	Coxiella	uncultured bacterium		4	0	0
ASV1813	Bacteria	Proteobacteria	Gammaproteobacteria	Coxiellales	Coxiellaceae	Coxiella	uncultured bacterium		18	0	2
ASV1814	Bacteria	Proteobacteria	Gammaproteobacteria	Coxiellales	Coxiellaceae	Coxiella	uncultured bacterium		16	1	1
ASV1815	Bacteria	Proteobacteria	Gammaproteobacteria	Coxiellales	Coxiellaceae	Coxiella	uncultured bacterium		6	0	0
ASV1816	Bacteria	Proteobacteria	Gammaproteobacteria	Coxiellales	Coxiellaceae	Coxiella	uncultured bacterium		14	0	0
ASV1817	Bacteria	Proteobacteria	Gammaproteobacteria	Coxiellales	Coxiellaceae	Coxiella	uncultured bacterium		3	0	1
ASV1818	Bacteria	Proteobacteria	Gammaproteobacteria	Coxiellales	Coxiellaceae	Coxiella	uncultured bacterium		3	2	1
ASV1819	Bacteria	Proteobacteria	Gammaproteobacteria	Coxiellales	Coxiellaceae	Coxiella	uncultured bacterium		5	1	0
ASV1820	Bacteria	Proteobacteria	Gammaproteobacteria	Coxiellales	Coxiellaceae	Coxiella	uncultured bacterium		5	2	0
ASV1821	Bacteria	Proteobacteria	Gammaproteobacteria	Coxiellales	Coxiellaceae	Coxiella	uncultured gamma proteobacterium		13	2	1
ASV1822	Bacteria	Proteobacteria	Gammaproteobacteria	Coxiellales	Coxiellaceae	Coxiella	uncultured gamma proteobacterium		3	0	1
ASV1823	Bacteria	Proteobacteria	Gammaproteobacteria	Coxiellales	Coxiellaceae	Coxiella	uncultured Legionella sp.		4	0	1
ASV1824	Bacteria	Proteobacteria	Gammaproteobacteria	Coxiellales	Coxiellaceae	Coxiella	uncultured Legionellales bacterium		0	0	2
ASV1825	Bacteria	Proteobacteria	Gammaproteobacteria	Coxiellales	Coxiellaceae	Coxiella	uncultured Legionellales bacterium		0	1	1
ASV1826	Bacteria	Proteobacteria	Gammaproteobacteria	Coxiellales	Coxiellaceae	Coxiella	uncultured Legionellales bacterium		3	0	0
ASV1827	Bacteria	Proteobacteria	Gammaproteobacteria	Coxiellales	Coxiellaceae	Coxiella	uncultured Legionellales bacterium		13	0	0
ASV1828	Bacteria	Proteobacteria	Gammaproteobacteria	Coxiellales	Coxiellaceae	Coxiella	uncultured Legionellales bacterium		0	2	1
ASV1829	Bacteria	Proteobacteria	Gammaproteobacteria	Coxiellales	Coxiellaceae	Coxiella	uncultured Legionellales bacterium		6	0	0
ASV1830	Bacteria	Proteobacteria	Gammaproteobacteria	Coxiellales	Coxiellaceae	Coxiella	uncultured Legionellales bacterium		2	0	0
ASV1831	Bacteria	Proteobacteria	Gammaproteobacteria	Coxiellales	Coxiellaceae	Coxiella	uncultured marine bacterium		1	1	0
ASV1832	Bacteria	Proteobacteria	Gammaproteobacteria	Coxiellales	Coxiellaceae	Coxiella	uncultured marine bacterium		6	0	1
ASV1833	Bacteria	Proteobacteria	Gammaproteobacteria	Coxiellales	Coxiellaceae	Coxiella	uncultured marine bacterium		0	0	2
ASV1834	Bacteria	Proteobacteria	Gammaproteobacteria	Coxiellales	Coxiellaceae	Coxiella	uncultured marine bacterium		15	2	2
ASV1835	Bacteria	Proteobacteria	Gammaproteobacteria	Coxiellales	Coxiellaceae	Coxiella	uncultured marine bacterium		0	0	3
ASV1836	Bacteria	Proteobacteria	Gammaproteobacteria	Coxiellales	Coxiellaceae	Coxiella	uncultured marine bacterium		13	0	1
ASV1837	Bacteria	Proteobacteria	Gammaproteobacteria	Coxiellales	Coxiellaceae	Coxiella	uncultured marine bacterium		16	1	6
ASV1838	Bacteria	Proteobacteria	Gammaproteobacteria	Coxiellales	Coxiellaceae	Coxiella	uncultured marine bacterium		0	1	1
ASV1839	Bacteria	Proteobacteria	Gammaproteobacteria	Coxiellales	Coxiellaceae	Coxiella	uncultured marine bacterium		5	1	0
ASV1840	Bacteria	Proteobacteria	Gammaproteobacteria	Coxiellales	Coxiellaceae	Coxiella	uncultured marine bacterium		8	1	7
ASV1841	Bacteria	Proteobacteria	Gammaproteobacteria	Coxiellales	Coxiellaceae	Coxiella	uncultured marine bacterium		2	1	0
ASV1842	Bacteria	Proteobacteria	Gammaproteobacteria	Coxiellales	Coxiellaceae	Coxiella	uncultured marine bacterium		4	0	0
ASV1843	Bacteria	Proteobacteria	Gammaproteobacteria	Coxiellales	Coxiellaceae	Coxiella	uncultured marine bacterium		4	1	0
ASV1844	Bacteria	Proteobacteria	Gammaproteobacteria	Coxiellales	Coxiellaceae	Coxiella	uncultured marine bacterium		17	1	0
ASV1845	Bacteria	Proteobacteria	Gammaproteobacteria	Coxiellales	Coxiellaceae	Coxiella	uncultured marine microorganism		4	0	0
ASV1846	Bacteria	Proteobacteria	Gammaproteobacteria	Coxiellales	Coxiellaceae	Coxiella	uncultured marine microorganism		10	1	1
ASV1847	Bacteria	Proteobacteria	Gammaproteobacteria	Coxiellales	Coxiellaceae	Coxiella	uncultured marine microorganism		3	1	0
ASV1848	Bacteria	Proteobacteria	Gammaproteobacteria	Coxiellales	Coxiellaceae	Coxiella	uncultured marine microorganism		2	0	1
ASV1849	Bacteria	Proteobacteria	Gammaproteobacteria	Coxiellales	Coxiellaceae	Coxiella	uncultured organism		0	0	2
ASV1850	Bacteria	Proteobacteria	Gammaproteobacteria	Coxiellales	Coxiellaceae	Coxiella			0	1	3
ASV1851	Bacteria	Proteobacteria	Gammaproteobacteria	Coxiellales	Coxiellaceae	Coxiella			3	0	0
ASV1852	Bacteria	Proteobacteria	Gammaproteobacteria	Coxiellales	Coxiellaceae	Coxiella			1	1	0
ASV1853	Bacteria	Proteobacteria	Gammaproteobacteria	Coxiellales	Coxiellaceae	Coxiella			3	0	0
ASV1854	Bacteria	Proteobacteria	Gammaproteobacteria	Coxiellales	Coxiellaceae	Coxiella			1	0	1
ASV1855	Bacteria	Proteobacteria	Gammaproteobacteria	Coxiellales	Coxiellaceae	Coxiella			1	0	1
ASV1856	Bacteria	Proteobacteria	Gammaproteobacteria	Coxiellales	Coxiellaceae	Coxiella			14	4	1
ASV1857	Bacteria	Proteobacteria	Gammaproteobacteria	Coxiellales	Coxiellaceae	Coxiella			7	0	0
ASV1858	Bacteria	Proteobacteria	Gammaproteobacteria	Coxiellales	Coxiellaceae	Coxiella			0	0	2
ASV1859	Bacteria	Proteobacteria	Gammaproteobacteria	Coxiellales	Coxiellaceae	Coxiella			3	1	0
ASV1860	Bacteria	Proteobacteria	Gammaproteobacteria	Coxiellales	Coxiellaceae	Coxiella			4	0	0
ASV1861	Bacteria	Proteobacteria	Gammaproteobacteria	Coxiellales	Coxiellaceae	Coxiella			0	1	4
ASV1862	Bacteria	Proteobacteria	Gammaproteobacteria	Coxiellales	Coxiellaceae	Coxiella			4	1	0
ASV1863	Bacteria	Proteobacteria	Gammaproteobacteria	Coxiellales	Coxiellaceae	Coxiella			0	0	2
ASV1864	Bacteria	Proteobacteria	Gammaproteobacteria	Coxiellales	Coxiellaceae	Coxiella			0	3	4
ASV1865	Bacteria	Proteobacteria	Gammaproteobacteria	Coxiellales	Coxiellaceae	Coxiella			2	1	1
ASV1866	Bacteria	Proteobacteria	Gammaproteobacteria	Coxiellales	Coxiellaceae	Coxiella			4	0	0
ASV1867	Bacteria	Proteobacteria	Gammaproteobacteria	Coxiellales	Coxiellaceae	Coxiella			4	1	1
ASV1868	Bacteria	Proteobacteria	Gammaproteobacteria	Coxiellales	Coxiellaceae	Coxiella			3	0	0
ASV1869	Bacteria	Proteobacteria	Gammaproteobacteria	Coxiellales	Coxiellaceae	Coxiella			2	1	0
ASV1870	Bacteria	Proteobacteria	Gammaproteobacteria	Coxiellales	Coxiellaceae	Coxiella			9	2	0
ASV1871	Bacteria	Proteobacteria	Gammaproteobacteria	Coxiellales	Coxiellaceae	Coxiella			16	0	0
ASV1872	Bacteria	Proteobacteria	Gammaproteobacteria	Coxiellales	Coxiellaceae	Coxiella			2	0	2
ASV1873	Bacteria	Proteobacteria	Gammaproteobacteria	Coxiellales	Coxiellaceae	Coxiella			8	0	0
ASV1874	Bacteria	Proteobacteria	Gammaproteobacteria	Coxiellales	Coxiellaceae	Coxiella			12	0	0
ASV1875	Bacteria	Proteobacteria	Gammaproteobacteria	Coxiellales	Coxiellaceae	Coxiella			12	0	1
ASV1876	Bacteria	Proteobacteria	Gammaproteobacteria	Coxiellales	Coxiellaceae	Coxiella			1	1	0
ASV1877	Bacteria	Proteobacteria	Gammaproteobacteria	Coxiellales	Coxiellaceae	Coxiella			7	0	0
ASV1878	Bacteria	Proteobacteria	Gammaproteobacteria	Coxiellales	Coxiellaceae	Coxiella			0	0	2
ASV1879	Bacteria	Proteobacteria	Gammaproteobacteria	Coxiellales	Coxiellaceae	Coxiella			7	0	0
ASV1880	Bacteria	Proteobacteria	Gammaproteobacteria	Coxiellales	Coxiellaceae	Coxiella			11	1	2
ASV1881	Bacteria	Proteobacteria	Gammaproteobacteria	Coxiellales	Coxiellaceae	Coxiella			5	0	0
ASV1882	Bacteria	Proteobacteria	Gammaproteobacteria	Coxiellales	Coxiellaceae	Coxiella			2	0	0
ASV1883	Bacteria	Proteobacteria	Gammaproteobacteria	Coxiellales	Coxiellaceae	Coxiella			0	0	2
ASV1884	Bacteria	Proteobacteria	Gammaproteobacteria	Coxiellales	Coxiellaceae	Coxiella			4	0	0
ASV1885	Bacteria	Proteobacteria	Gammaproteobacteria	Coxiellales	Coxiellaceae	Coxiella			13	1	0
ASV1886	Bacteria	Proteobacteria	Gammaproteobacteria	Coxiellales	Coxiellaceae	Coxiella			3	0	0
ASV1887	Bacteria	Proteobacteria	Gammaproteobacteria	Coxiellales	Coxiellaceae	Coxiella			3	2	1
ASV1888	Bacteria	Proteobacteria	Gammaproteobacteria	Coxiellales	Coxiellaceae	Coxiella			1	1	4
ASV1889	Bacteria	Proteobacteria	Gammaproteobacteria	Diplorickettsiales	Diplorickettsiaceae	uncultured			5	0	0
ASV1890	Bacteria	Proteobacteria	Gammaproteobacteria	EC3	uncultured bacterium	uncultured bacterium	uncultured bacterium		2	0	1
ASV1891	Bacteria	Proteobacteria	Gammaproteobacteria	EC3	uncultured bacterium	uncultured bacterium	uncultured bacterium		10	0	1
ASV1892	Bacteria	Proteobacteria	Gammaproteobacteria	EC3	uncultured bacterium	uncultured bacterium	uncultured bacterium		9	1	1
ASV1893	Bacteria	Proteobacteria	Gammaproteobacteria	EC3	uncultured bacterium	uncultured bacterium	uncultured bacterium		1	0	1
ASV1894	Bacteria	Proteobacteria	Gammaproteobacteria	EC3	uncultured bacterium	uncultured bacterium	uncultured bacterium		3	0	0
ASV1895	Bacteria	Proteobacteria	Gammaproteobacteria	EC3	uncultured marine bacterium	uncultured marine bacterium	uncultured marine bacterium		7	0	0
ASV1896	Bacteria	Proteobacteria	Gammaproteobacteria	Ectothiorhodospirales	Ectothiorhodospiraceae	uncultured	Ambiguous_taxa		1	0	1
ASV1897	Bacteria	Proteobacteria	Gammaproteobacteria	Ectothiorhodospirales	Ectothiorhodospiraceae	uncultured	Ambiguous_taxa		2	1	5
ASV1898	Bacteria	Proteobacteria	Gammaproteobacteria	Ectothiorhodospirales	Ectothiorhodospiraceae	uncultured	Ambiguous_taxa		1	1	0
ASV1899	Bacteria	Proteobacteria	Gammaproteobacteria	Ectothiorhodospirales	Ectothiorhodospiraceae	uncultured	Ambiguous_taxa		2	3	3
ASV1900	Bacteria	Proteobacteria	Gammaproteobacteria	Ectothiorhodospirales	Ectothiorhodospiraceae	uncultured	Ambiguous_taxa		14	0	0
ASV1901	Bacteria	Proteobacteria	Gammaproteobacteria	Ectothiorhodospirales	Ectothiorhodospiraceae	uncultured	Ambiguous_taxa		4	5	18
ASV1902	Bacteria	Proteobacteria	Gammaproteobacteria	Ectothiorhodospirales	Ectothiorhodospiraceae	uncultured	uncultured marine bacterium		100	12	1
ASV1903	Bacteria	Proteobacteria	Gammaproteobacteria	Ectothiorhodospirales	Ectothiorhodospiraceae	uncultured	uncultured marine bacterium		4	23	38
ASV1904	Bacteria	Proteobacteria	Gammaproteobacteria	Ectothiorhodospirales	Ectothiorhodospiraceae	uncultured	uncultured marine bacterium		0	0	2
ASV1905	Bacteria	Proteobacteria	Gammaproteobacteria	Ectothiorhodospirales	Ectothiorhodospiraceae	uncultured	uncultured marine bacterium		6	0	0
ASV1906	Bacteria	Proteobacteria	Gammaproteobacteria	Ectothiorhodospirales	Ectothiorhodospiraceae	uncultured	uncultured marine bacterium		2	0	0
ASV1907	Bacteria	Proteobacteria	Gammaproteobacteria	Ectothiorhodospirales					4	0	1
ASV1908	Bacteria	Proteobacteria	Gammaproteobacteria	Francisellales	Francisellaceae	[Caedibacter] taeniospiralis group	Francisellaceae bacterium		5	0	1
ASV1909	Bacteria	Proteobacteria	Gammaproteobacteria	Francisellales	Francisellaceae	[Caedibacter] taeniospiralis group			2	0	0
ASV1910	Bacteria	Proteobacteria	Gammaproteobacteria	Francisellales	Francisellaceae	Francisella	Ambiguous_taxa		2	0	0
ASV1911	Bacteria	Proteobacteria	Gammaproteobacteria	Francisellales	Francisellaceae	uncultured	Ambiguous_taxa		5	0	0
ASV1912	Bacteria	Proteobacteria	Gammaproteobacteria	Francisellales	Francisellaceae	uncultured	uncultured bacterium		0	0	2
ASV1913	Bacteria	Proteobacteria	Gammaproteobacteria	Francisellales	Francisellaceae				3	0	0
ASV1914	Bacteria	Proteobacteria	Gammaproteobacteria	Francisellales	Francisellaceae				6	1	0
ASV1915	Bacteria	Proteobacteria	Gammaproteobacteria	Ga0077536	uncultured bacterium	uncultured bacterium	uncultured bacterium		0	1	3
ASV1916	Bacteria	Proteobacteria	Gammaproteobacteria	Ga0077536	uncultured bacterium	uncultured bacterium	uncultured bacterium		0	2	8
ASV1917	Bacteria	Proteobacteria	Gammaproteobacteria	Ga0077536					7	0	1
ASV1918	Bacteria	Proteobacteria	Gammaproteobacteria	Gammaproteobacteria Incertae Sedis	Unknown Family	Marinicella			1	0	1
ASV1919	Bacteria	Proteobacteria	Gammaproteobacteria	Gammaproteobacteria Incertae Sedis	Unknown Family	uncultured	uncultured bacterium		2	0	0
ASV1920	Bacteria	Proteobacteria	Gammaproteobacteria	Gammaproteobacteria Incertae Sedis	Unknown Family	uncultured			5	1	0
ASV1921	Bacteria	Proteobacteria	Gammaproteobacteria	Gammaproteobacteria Incertae Sedis	Unknown Family	uncultured bacterium	uncultured bacterium		3	0	0
ASV1922	Bacteria	Proteobacteria	Gammaproteobacteria	Gammaproteobacteria Incertae Sedis	Unknown Family	uncultured bacterium	uncultured bacterium		7	2	1
ASV1923	Bacteria	Proteobacteria	Gammaproteobacteria	Gammaproteobacteria Incertae Sedis	Unknown Family	uncultured marine bacterium	uncultured marine bacterium		0	1	1
ASV1924	Bacteria	Proteobacteria	Gammaproteobacteria	Gammaproteobacteria Incertae Sedis	Unknown Family	uncultured organism	uncultured organism		2	1	0
ASV1925	Bacteria	Proteobacteria	Gammaproteobacteria	HglApr721	uncultured gamma proteobacterium	uncultured gamma proteobacterium	uncultured gamma proteobacterium		7	0	0
ASV1926	Bacteria	Proteobacteria	Gammaproteobacteria	HOC36	uncultured marine bacterium	uncultured marine bacterium	uncultured marine bacterium		1	1	2
ASV1927	Bacteria	Proteobacteria	Gammaproteobacteria	HOC36	uncultured sediment bacterium	uncultured sediment bacterium	uncultured sediment bacterium		4	2	2
ASV1928	Bacteria	Proteobacteria	Gammaproteobacteria	KI89A clade	Ambiguous_taxa	Ambiguous_taxa	Ambiguous_taxa		1	0	2
ASV1929	Bacteria	Proteobacteria	Gammaproteobacteria	KI89A clade	Ambiguous_taxa	Ambiguous_taxa	Ambiguous_taxa		0	4	8
ASV1930	Bacteria	Proteobacteria	Gammaproteobacteria	KI89A clade	Ambiguous_taxa	Ambiguous_taxa	Ambiguous_taxa		0	1	9
ASV1931	Bacteria	Proteobacteria	Gammaproteobacteria	KI89A clade	uncultured bacterium	uncultured bacterium	uncultured bacterium		0	0	2
ASV1932	Bacteria	Proteobacteria	Gammaproteobacteria	KI89A clade	uncultured bacterium	uncultured bacterium	uncultured bacterium		1	2	2
ASV1933	Bacteria	Proteobacteria	Gammaproteobacteria	KI89A clade	uncultured bacterium	uncultured bacterium	uncultured bacterium		0	0	2
ASV1934	Bacteria	Proteobacteria	Gammaproteobacteria	KI89A clade					0	0	4
ASV1935	Bacteria	Proteobacteria	Gammaproteobacteria	KI89A clade					2	0	0
ASV1936	Bacteria	Proteobacteria	Gammaproteobacteria	KI89A clade					50	9	2
ASV1937	Bacteria	Proteobacteria	Gammaproteobacteria	KI89A clade					1	1	0
ASV1938	Bacteria	Proteobacteria	Gammaproteobacteria	KI89A clade					31	9	23
ASV1939	Bacteria	Proteobacteria	Gammaproteobacteria	KI89A clade					0	0	2
ASV1940	Bacteria	Proteobacteria	Gammaproteobacteria	KI89A clade					9	0	0
ASV1941	Bacteria	Proteobacteria	Gammaproteobacteria	Legionellales	Legionellaceae	Legionella	uncultured organism		1	1	0
ASV1942	Bacteria	Proteobacteria	Gammaproteobacteria	Legionellales	Legionellaceae	uncultured	uncultured bacterium		3	0	0
ASV1943	Bacteria	Proteobacteria	Gammaproteobacteria	Legionellales	Legionellaceae	uncultured	uncultured gamma proteobacterium		3	0	0
ASV1944	Bacteria	Proteobacteria	Gammaproteobacteria	Legionellales	Legionellaceae	uncultured	uncultured gamma proteobacterium		16	2	0
ASV1945	Bacteria	Proteobacteria	Gammaproteobacteria	Legionellales	Legionellaceae	uncultured	uncultured marine bacterium		12	2	0
ASV1946	Bacteria	Proteobacteria	Gammaproteobacteria	Legionellales	Legionellaceae	uncultured	unidentified marine bacterioplankton		12	0	0
ASV1947	Bacteria	Proteobacteria	Gammaproteobacteria	Legionellales	Legionellaceae	uncultured			4	1	0
ASV1948	Bacteria	Proteobacteria	Gammaproteobacteria	Legionellales	Legionellaceae	uncultured			3	0	1
ASV1949	Bacteria	Proteobacteria	Gammaproteobacteria	MBAE14	uncultured bacterium	uncultured bacterium	uncultured bacterium		1	1	0
ASV1950	Bacteria	Proteobacteria	Gammaproteobacteria	MBMPE27	uncultured gamma proteobacterium	uncultured gamma proteobacterium	uncultured gamma proteobacterium		5	1	0
ASV1951	Bacteria	Proteobacteria	Gammaproteobacteria	Methylococcales	Cycloclasticaceae	Cycloclasticus	Ambiguous_taxa		2	0	0
ASV1952	Bacteria	Proteobacteria	Gammaproteobacteria	Nitrosococcales	Nitrosococcaceae	Cm1-21	uncultured bacterium		111	21	8
ASV1953	Bacteria	Proteobacteria	Gammaproteobacteria	Nitrosococcales	Nitrosococcaceae	Cm1-21			24	1	0
ASV1954	Bacteria	Proteobacteria	Gammaproteobacteria	Oceanospirillales	Alcanivoracaceae	Alcanivorax	uncultured bacterium		2	0	0
ASV1955	Bacteria	Proteobacteria	Gammaproteobacteria	Oceanospirillales	Alcanivoracaceae	Alcanivorax	uncultured bacterium		105	20	10
ASV1956	Bacteria	Proteobacteria	Gammaproteobacteria	Oceanospirillales	Endozoicomonadaceae	Endozoicomonas	Ambiguous_taxa		2	0	0
ASV1957	Bacteria	Proteobacteria	Gammaproteobacteria	Oceanospirillales	Endozoicomonadaceae	Endozoicomonas	Ambiguous_taxa		4	0	0
ASV1958	Bacteria	Proteobacteria	Gammaproteobacteria	Oceanospirillales	Endozoicomonadaceae	Endozoicomonas	Ambiguous_taxa		3	0	0
ASV1959	Bacteria	Proteobacteria	Gammaproteobacteria	Oceanospirillales	Endozoicomonadaceae	Endozoicomonas	Ambiguous_taxa		2	1	0
ASV1960	Bacteria	Proteobacteria	Gammaproteobacteria	Oceanospirillales	Endozoicomonadaceae	Endozoicomonas	Ambiguous_taxa		5	1	0
ASV1961	Bacteria	Proteobacteria	Gammaproteobacteria	Oceanospirillales	Endozoicomonadaceae	Endozoicomonas	uncultured bacterium		4	2	1
ASV1962	Bacteria	Proteobacteria	Gammaproteobacteria	Oceanospirillales	Endozoicomonadaceae	Endozoicomonas	uncultured bacterium		3	0	0
ASV1963	Bacteria	Proteobacteria	Gammaproteobacteria	Oceanospirillales	Endozoicomonadaceae	Endozoicomonas	uncultured bacterium		0	3	0
ASV1964	Bacteria	Proteobacteria	Gammaproteobacteria	Oceanospirillales	Endozoicomonadaceae	Endozoicomonas	uncultured bacterium		1	1	0
ASV1965	Bacteria	Proteobacteria	Gammaproteobacteria	Oceanospirillales	Endozoicomonadaceae	Endozoicomonas	uncultured bacterium		1	1	0
ASV1966	Bacteria	Proteobacteria	Gammaproteobacteria	Oceanospirillales	Endozoicomonadaceae	Endozoicomonas	uncultured bacterium		0	1	2
ASV1967	Bacteria	Proteobacteria	Gammaproteobacteria	Oceanospirillales	Endozoicomonadaceae	Endozoicomonas	uncultured marine bacterium		2	1	1
ASV1968	Bacteria	Proteobacteria	Gammaproteobacteria	Oceanospirillales	Endozoicomonadaceae	Endozoicomonas			0	2	0
ASV1969	Bacteria	Proteobacteria	Gammaproteobacteria	Oceanospirillales	Endozoicomonadaceae	Endozoicomonas			0	3	0
ASV1970	Bacteria	Proteobacteria	Gammaproteobacteria	Oceanospirillales	Endozoicomonadaceae	Endozoicomonas			0	1	1
ASV1971	Bacteria	Proteobacteria	Gammaproteobacteria	Oceanospirillales	Endozoicomonadaceae	Endozoicomonas			1	1	0
ASV1972	Bacteria	Proteobacteria	Gammaproteobacteria	Oceanospirillales	Endozoicomonadaceae	Endozoicomonas			4	0	0
ASV1973	Bacteria	Proteobacteria	Gammaproteobacteria	Oceanospirillales	Endozoicomonadaceae	Endozoicomonas			0	1	1
ASV1974	Bacteria	Proteobacteria	Gammaproteobacteria	Oceanospirillales	Halomonadaceae	Oceanospirillum	Ambiguous_taxa		3	1	1
ASV1975	Bacteria	Proteobacteria	Gammaproteobacteria	Oceanospirillales	Kangiellaceae	Pleionea	Kangiella sp. MMH2-2		2	0	1
ASV1976	Bacteria	Proteobacteria	Gammaproteobacteria	Oceanospirillales	Litoricolaceae	Litoricola	uncultured bacterium		120	32	19
ASV1977	Bacteria	Proteobacteria	Gammaproteobacteria	Oceanospirillales	Litoricolaceae	Litoricola	uncultured bacterium		0	0	3
ASV1978	Bacteria	Proteobacteria	Gammaproteobacteria	Oceanospirillales	Litoricolaceae	Litoricola	uncultured bacterium		0	1	4
ASV1979	Bacteria	Proteobacteria	Gammaproteobacteria	Oceanospirillales	Litoricolaceae	Litoricola	uncultured gamma proteobacterium CHAB-V-35		47	3	1
ASV1980	Bacteria	Proteobacteria	Gammaproteobacteria	Oceanospirillales	Litoricolaceae	Litoricola	uncultured gamma proteobacterium CHAB-V-35		7	1	0
ASV1981	Bacteria	Proteobacteria	Gammaproteobacteria	Oceanospirillales	Litoricolaceae	Litoricola			0	1	3
ASV1982	Bacteria	Proteobacteria	Gammaproteobacteria	Oceanospirillales	Litoricolaceae	Litoricola			0	1	3
ASV1983	Bacteria	Proteobacteria	Gammaproteobacteria	Oceanospirillales	Marinomonadaceae	Marinomonas	Marinomonas communis		1	1	1
ASV1984	Bacteria	Proteobacteria	Gammaproteobacteria	Oceanospirillales	Marinomonadaceae	Marinomonas	Marinomonas sp. Y5		2	0	0
ASV1985	Bacteria	Proteobacteria	Gammaproteobacteria	Oceanospirillales	Marinomonadaceae	Marinomonas			3	0	0
ASV1986	Bacteria	Proteobacteria	Gammaproteobacteria	Oceanospirillales	Nitrincolaceae	Amphritea			1	2	1
ASV1987	Bacteria	Proteobacteria	Gammaproteobacteria	Oceanospirillales	Nitrincolaceae	Marinobacterium	Ambiguous_taxa		9	0	1
ASV1988	Bacteria	Proteobacteria	Gammaproteobacteria	Oceanospirillales	Nitrincolaceae	Marinobacterium	uncultured bacterium		1	1	0
ASV1989	Bacteria	Proteobacteria	Gammaproteobacteria	Oceanospirillales	Nitrincolaceae	Marinobacterium	uncultured bacterium		65	7	2
ASV1990	Bacteria	Proteobacteria	Gammaproteobacteria	Oceanospirillales	Nitrincolaceae	Marinobacterium	uncultured bacterium		4	5	1
ASV1991	Bacteria	Proteobacteria	Gammaproteobacteria	Oceanospirillales	Nitrincolaceae	Marinobacterium			6	0	0
ASV1992	Bacteria	Proteobacteria	Gammaproteobacteria	Oceanospirillales	Nitrincolaceae	Marinobacterium			0	2	1
ASV1993	Bacteria	Proteobacteria	Gammaproteobacteria	Oceanospirillales	Nitrincolaceae	Neptuniibacter	Ambiguous_taxa		5	1	1
ASV1994	Bacteria	Proteobacteria	Gammaproteobacteria	Oceanospirillales	Nitrincolaceae	Neptuniibacter	Ambiguous_taxa		3	0	0
ASV1995	Bacteria	Proteobacteria	Gammaproteobacteria	Oceanospirillales	Nitrincolaceae	Neptunomonas	Ambiguous_taxa		2	0	0
ASV1996	Bacteria	Proteobacteria	Gammaproteobacteria	Oceanospirillales	Nitrincolaceae	Profundimonas	Ambiguous_taxa		1	0	1
ASV1997	Bacteria	Proteobacteria	Gammaproteobacteria	Oceanospirillales	Nitrincolaceae	uncultured	Saccharophagus degradans		1	1	1
ASV1998	Bacteria	Proteobacteria	Gammaproteobacteria	Oceanospirillales	Nitrincolaceae	uncultured			24	3	0
[truncated: 282 more rows]

## Sheet: Table_S6
Table S6. Comparisons of the relative abundance of the top 14 most abundant orders. Significant DESeq2 normalized differences across environments and seasons within each environment are shown.
Order	Coastal vs Transition (p-adjusted)	Coastal vs Offshore (p-adjusted)	Transition vs Offshore (p-adjusted)	Ave. relative abundance, coastal (n=120)	s.d. of ave. relative abundance, coastal (n=120)	Ave. relative abundance, transition (n=40)	s.d. of ave. relative abundance, transition (n=40)	Ave. relative abundance, offshore (n=40)	s.d. of ave. relative abundance, offshore (n=40)
Synechococcales	<0.001	0.266	0.023	0.2631	0.1059	0.1497	0.0837	0.2259	0.0606
Pelagibacterales	<0.001	<0.001	<0.001	0.1859	0.0434	0.206	0.0618	0.3155	0.0762
Flavobacteriales	<0.001	0.894	<0.001	0.1298	0.0534	0.2469	0.0809	0.1227	0.0488
Chloroplast	0.32	<0.001	<0.001	0.1281	0.0528	0.1152	0.0531	0.082	0.0567
Rhodobacterales	<0.001	<0.001	<0.001	0.0803	0.0279	0.0535	0.0221	0.0423	0.0193
Puniceispirillales	<0.001	<0.001	<0.001	0.0454	0.0251	0.1191	0.0415	0.0641	0.0272
SAR86 clade	<0.001	0.022	<0.001	0.0341	0.0193	0.0177	0.0119	0.0396	0.0132
Cellvibrionales	0.897	<0.001	<0.001	0.0236	0.0075	0.0193	0.0059	0.0135	0.0062
Rickettsiales	<0.001	0.68	<0.001	0.0123	0.0099	0.005	0.0032	0.0109	0.0043
Actinomarinales	<0.001	<0.001	<0.001	0.0118	0.0066	0.0068	0.0055	0.0178	0.0075
Oceanospirillales	<0.001	<0.001	0.11	0.0098	0.0054	0.0037	0.0044	0.0029	0.0036
Betaproteobacteriales	<0.001	<0.001	<0.001	0.0076	0.0021	0.0033	0.003	0.0017	0.0024
Euryarchaeota Marine Group II	<0.001	<0.001	<0.001	0.0043	0.0047	0.0123	0.0084	0.0076	0.0048
Parvibaculales	<0.001	<0.001	<0.001	0.0031	0.0021	0.0095	0.0051	0.0055	0.002

## Sheet: Table_S7
Table S7. Number of SAR11 ASVs detected across KByT.
SAR11	SAR11 ASVs	Coastal	Transition	Offshore
subclade	(total no.)a	(mean±s.d.)a	(mean±s.d.)a	(mean±s.d.)a
Ia	21	5±2	4±1	4±1
Ib	20	0±1	3±3	8±3
IIa	41	3±1	4±2	8±4
IIb	2	0±0	0±0	0±0
IIIa	7	2±1	2±1	2±1
IV	4	1±1	1±0	1±0
Va	3	1±0	1±0	1±0
Vb	8	2±1	1±1	3±1
All	106	14±4	17±6	28+9
a n=120 coastal, 40 transition, and 40 offshore samples.

## Sheet: Table_S8
Table S8: Summary of SAR11 ASVs recovered from KByT. ASVs with significant DESeq2 normalized differences across environments and seasons within each environment (C=coastal, T=transition, and O=offshore) are noted.
ASV	Subclade	Total no. of samples detected (n=200)	Coastal samples detected (n=120)	Transition samples detected (n=40)	Offshore samples detected (n=40)	Ave. relative abundance, total (n=200)	s.d. of ave. relative abundance, total (n=200)	Ave. relative abundance, coastal (n=120)	s.d. of ave. relative abundance, coastal (n=120)	Ave. relative abundance, transition (n=40)	s.d. of ave. relative abundance, transition (n=40)	Ave. relative abundance, offshore (n=40)	s.d. of ave. relative abundance, offshore (n=40)	Ave. relative abundance, SAR11 fraction, total (n=200)	s.d. of ave. relative abundance, SAR11 fraction, total (n=200)	Ave. relative abundance, SAR11 fraction, coastal (n=120)	s.d. of ave. relative abundance, SAR11 fraction, coastal (n=120)	Ave. relative abundance, SAR11 fraction, transition (n=40)	s.d. of ave. relative abundance, SAR11 fraction, transition (n=40)	Ave. relative abundance, SAR11 fraction, offshore (n=40)	s.d. of ave. relative abundance, SAR11 fraction, offshore (n=40)	Coastal vs Offshore	Coastal vs Transition	Transition vs Offshore	Fall vs Winter	Winter vs Summer	Winter vs Spring	Spring vs Fall	Spring vs Summer	Fall vs Summer	ASV Sequence
ASV1	IV	9	1	2	6	0.00769	0.04218	0.00032	0.00351	0.00106	0.0047	0.03643	0.08921	0.02007	0.10625	0.00157	0.01721	0.00484	0.0229	0.0908	0.22304										TACGGAGGGATCTAGCGTTATTCGGAATTACTGGGCGTAAAGCGAGCGTAGGCGGATTTGTAAGTTGGAGGTGAAATCCCAGAGCTTAACTCTGGAACTGCCTTCAAAACTACATTTCTTGAGTTTGGTAGAGGAGAGTGGAATTCCTAGTGTAGAGGTGAAATTCGTAGATATTAGGAGGAACACCAGTGGCGAAGGCGACTCTCTGGGCCAATACTGACGCTGAGGTTCGAAAGCATGGGTAG
ASV2	IV	21	20	0	1	0.0074	0.0261	0.01199	0.03274	0	0	0.00104	0.00655	0.03404	0.1206	0.05486	0.15102	0	0	0.00565	0.03572	X					C				TACGGAGGGATCTAGCGTTATTCGGAATTACTGGGCGTAAAGCGAGCGTAGGCTGATTTGTAAGTTGGATGTGAAATCCCAGAGCTTAACTCTGGAACTGCATCCAAAACTATTTTTCTTGAGTTTGGTAGAGGAGAGTGGAATTCCTAGTGTAGAGGTGAAATTCGTAGATATTAGGAGGAACACCAGTGGCGAAGGCGACTCTCTGGGCCAATACTGACGCTGAGGTTCGAAAGCGTGGGTAG
ASV3	IV	11	10	1	0	0.00326	0.01592	0.00527	0.02026	0.00049	0.00309	0	0	0.01481	0.07239	0.02375	0.09197	0.00279	0.01763	0	0										TACGGAGGGATCTAGCGTTATTCGGAATTACTGGGCTTAAAGCGAGCGTAGGCTGATTTGTAAGTTGGATGTGAAATCCCAGAGCTTAACTCTGGAACTGCATCCAAAACTATTTTTCTTGAGTTTGGTAGAGGAGAGTGGAATTCCTAGTGTAGAGGTGAAATTCGTAGATATTAGGAGGAACACCAGTGGCGAAGGCGACTCTCTGGGCCAATACTGACGCTGAGGTTCGAAAGCGTGGGTAG
ASV4	IV	157	86	31	40	0.24701	0.33369	0.09388	0.13429	0.22321	0.27867	0.73022	0.3511	0.82925	0.92869	0.40732	0.52057	0.86035	0.86889	2.06394	0.84063	X	X	X			C	C	C		TACGGAGGGGTCTAGCGTTATTCGGAATTACTGGGCGTAAAGCGAGCGTAGGCGGATTTGTAAGTTGGAGGTGAAATCCCAGAGCTTAACTCTGGAACTGCCTTCAAAACTACATTTCTTGAGTTTGGTAGAGGAGAGTGGAATTCCTAGTGTAGAGGTGAAATTCGTAGATATTAGGAGGAACACCAGTGGCGAAGGCGACTCTCTGGGCCAATACTGACGCTGAGGTTCGAAAGCATGGGTAG
ASV5	IIIa	25	1	5	19	0.01128	0.04227	0.00014	0.00149	0.01035	0.03288	0.04564	0.08021	0.03106	0.11363	0.00047	0.0051	0.03426	0.10291	0.11966	0.21041	X									TACGAAGGGACCTAGCGTAGTTCGGAATTACTGGGCGTAAAGCGCGCGTAGGCGGTTATGTAAGTTAATTGTGAAAGCCCAAAGCTCAACTTTGGAACTGCAATTAAAACTATTTAGCTAGAGTTTGATAGAGGAAAGCGGAATACATAGTGTAGAGGTGAAATTCGTAGATATTATGTAGAACACCAGTTGCGAAGGCGGCTTTCTGGATCATTACTGACGCTGAGGTGCGAAAGTATGGGTAG
ASV6	IIIa	7	0	2	5	0.00443	0.02611	0	0	0.0049	0.02167	0.01725	0.05273	0.0118	0.06784	0	0	0.01436	0.06357	0.04465	0.13379										TACGAAGGGACCTAGCGTAGTTCGGAATTACTGGGCGTAAAGCGCGCGTAGGCGGTTAAGTAAGTTAATTGTGAAAGCCCAAAGCTCAACTTTGGAACTGCAATTAAAACTATTTAGCTAGAGTTTGATAGAGGAAAGCGGAATACATAGTGTAGAGGTGAAATTCGTAGATATTATGTAGAACACCAGTTGCGAAGGCGGCTTTCTGGATCATTACTGACGCTGAGGTGCGAAAGTATGGGTAG
ASV7	IIIa	9	0	5	4	0.00308	0.01568	0	0	0.00696	0.02118	0.00845	0.02706	0.01032	0.05251	0	0	0.02628	0.08421	0.0253	0.07849										TACGAAGGGACCTAGCGTAGTTCGGAATTACTGGGCGTAAAGCGCGCGTAGGCGGTTAAGTAAGTTAATTGTGAAAGCCCAAAGCTTAACTTTGGAACTGCAATTAAAACTATTTAGCTAGAGTTTGATAGAGGAAAGCGGAATACATAGTGTAGAGGTGAAATTCGTAGATATTATGTAGAACACCAGTTGCGAAGGCGGCTTTCTGGATCATTACTGACGCTGAGGTGCGAAAGTATGGGTAG
ASV8	IIIa	23	20	3	0	0.0343	0.10135	0.05056	0.12085	0.01982	0.07494	0	0	0.14724	0.43915	0.21808	0.52771	0.08198	0.30378	0	0	X					C				TACGAAGGGACCTAGCGTAATTCGGAATTACTGGGCGTAAAGCGCGCGTAGGCGGTTAAGTAAGTTAATTGTGAAAGCCCAAAGCTCAACTTTGGAATTGCAATTAAAACTATTTAGCTAGAGTTTATCAGAGGAAAGCGGAATACATAGTGTAGAGGTGAAATTCGTAGATATTATGTAGAACACCAGTTGCGAAGGCGGCTTTCTGGGATAATACTGACGCTGAGGTGCGAAAGTATGGGTAG
ASV9	IIIa	32	21	8	3	0.0558	0.14204	0.05834	0.14027	0.07416	0.17343	0.0298	0.10853	0.25668	0.64719	0.28131	0.68808	0.31529	0.68823	0.1242	0.44223										TACGAAGGGACCTAGCGTAATTCGGAATTACTGGGCGTAAAGCGCGCGTAGGCGGTTAAGTAAGTTAATTGTGAAAGCCCGAAGCTCAACTTCGGAATTGCAATTAAAACTACTTAGCTAGAGTTTATCAGAGGAAAGCGGAATACATAGTGTAGAGGTGAAATTCGTAGATATTATGTAGAACACCAGTTGCGAAGGCGGCTTTCTGGGATAATACTGACGCTGAGGTGCGAAAGTATGGGTAG
ASV10	IIIa	183	119	35	29	0.97357	0.80193	1.14794	0.79724	1.03245	0.82276	0.39156	0.46965	4.60115	4.08746	5.59991	4.10727	4.80131	4.06628	1.40473	1.91095	X		X	C	C	C				TACGAAGGGACCTAGCGTAATTCGGAATTACTGGGCGTAAAGCGCGCGTAGGCGGTTAAGTAAGTTAATTGTGAAAGCCCGAAGCTCAACTTCGGAATTGCAATTAAAACTACTTAGCTAGAGTTTATCAGAGGAAAGCGGAATACATAGTGTAGAGGTGAAATTCGTAGATATTATGTAGAACACCAGTTGCGAAGGCGGCTTTCTGGGATAACACTGACGCTGAGGTGCGAAAGTATGGGTAG
ASV11	IIIa	171	118	35	18	0.57071	0.43232	0.77893	0.39381	0.37428	0.2762	0.14251	0.20767	2.67792	2.12611	3.69268	1.9704	1.77706	1.35121	0.53449	0.82471	X	X	X	C		C		C		TACGAAGGGACCTAGCGTAATTCGGAATTACTGGGCGTAAAGCGCGCGTAGGCGGTTAAGTAAGTTAATTGTGAAAGCCCAAAGCTCAACTTTGGAATTGCAATTAAAACTATTTAGCTAGAGTTTATCAGAGGAAAGCGGAATACATAGTGTAGAGGTGAAATTCGTAGATATTATGTAGAACACCAGTTGCGAAGGCGGCTTTCTGGGATAACACTGACGCTGAGGTGCGAAAGTATGGGTAG
ASV12	Ia	11	5	4	2	0.01633	0.07084	0.01025	0.05114	0.03723	0.11542	0.01369	0.06109	0.06186	0.27448	0.04022	0.19609	0.14856	0.47545	0.04007	0.17721										TACGAAGGGACCTAGCGTAGTTCGGAATTACTGGGCTTAAAGAGTTCGTAGGTGGTTGAAAAAGTTGGTGGTGAAATCCCAGAGCTTAACTCTGGAACTGCCATCAAAACTTTTCAGCTAGAGTATGATAGAGGAAAGCAGAATTTCTAGTGTAGAGGTGAAATTCGTAGATATTAGAAAGAATACCAATTGCGAAGGCAGCTTTCTGGATCATAACTGACACTGAGGAACGAAAGCATGGGTAG
ASV13	Ia	44	41	3	0	0.09257	0.18259	0.14895	0.21584	0.01602	0.05815	0	0	0.37216	0.72471	0.59726	0.85389	0.06904	0.25082	0	0	X	X	X							TACGAAGGGACCTAGCGTAGTTCGGAATTACTGGGCTTAAAGAGTTCGTAGGTGGTTGAAAAAGTTAGTGGTGAAATCCCAGAGCTTAACTCTGGAACTGCCATTAAAGCTTTTCAGCTAGAGTATGATAGAGGAAAGCAGAATTTCTAGTGTAGAGGTGAAATTCGTAGATATTAGAAAGAATACCAATTGCGAAGGCAGCTTTCTGGATCATTACTGACACTGAGGAACGAAAGCATGGGTAG
ASV14	Ia	13	13	0	0	0.03244	0.13858	0.05406	0.17589	0	0	0	0	0.1227	0.51601	0.2045	0.65453	0	0	0	0	X			C	C		C	C		TACGAAGGGACCTAGCGTAGTTCGGAATTACTGGGCTTAAAGAGTTCGTAGGTGGTTGAAAAAGTTAGTGGTGAAATCCCAGAGCTTAACTCTGGAACTGCCATTAAAACTTTTCAGCTAGAGTGTGATAGAGGAAAGCAGAATTTCTAGTGTAGAGGTGAAATTCGTAGATATTAGAAAGAATACCAATTGCGAAGGCAGCTTTCTGGATCATTACTGACACTGAGGAACGAAAGCATGGGTAG
ASV15	Ia	2	2	0	0	0.0012	0.01212	0.002	0.01562	0	0	0	0	0.00484	0.05025	0.00807	0.06478	0	0	0	0										TACGAAGGGACCTAGCGTAGTTCGGAATTACTGGGCTTAAAGAGTTCGTAGGTGGTTGAAAAAGTTAGTGGTGAAATCCCAGAGCTTAACTCTGGAACTGCCATTAAAACTTTTCAGCTAGAGTTTGATAGAGGAAAGCAGAATTTCTAGTGTAGAGGTGAAATTCGTAGATATTAGAAAGAATACCAATTGCGAAGGCAGCTTTCTGGATCATTACTGACGCTGAGGAACGAAAGCATGGGTAG
ASV16	Ia	195	120	39	36	5.327	3.83995	7.64535	3.05189	2.72183	1.74531	0.97714	0.93139	24.1746	15.8908	34.7758	9.78581	13.0477	8.27623	3.49793	4.06455	X	X	X	C	C	C	C			TACGAAGGGACCTAGCGTAGTTCGGAATTACTGGGCTTAAAGAGTTCGTAGGTGGTTGAAAAAGTTAGTGGTGAAATCCCAGAGCTTAACTCTGGAACTGCCATTAAAACTTTTCAGCTAGAGTATGATAGAGGAAAGCAGAATTTCTAGTGTAGAGGTGAAATTCGTAGATATTAGAAAGAATACCAATTGCGAAGGCAGCTTTCTGGATCATTACTGACACTGAGGAACGAAAGCATGGGTAG
ASV17	Ia	6	0	0	6	0.00959	0.05523	0	0	0	0	0.04793	0.11696	0.02402	0.13814	0	0	0	0	0.12012	0.29245										TACGAAGGGACCTAGCGTAGTTCGGAATTACTGGGCTTAAAGAGTTCGTAGGTGGTTGAAAAAGTTGGTGGTGAAATCCCAGAGCTTAACTCTGGAACTGCCATCAAAGCTTTTCAGCTAGAGTTTGATAGAGGAAAGCAGAATTTCTAGTGTAGAGGTGAAATTCGTAGATATTAGAAAGAATACCAATTGCGAAGGCAGCTTTCTGGATCATTACTGACACTGAGGAACGAAAGCATGGGTAG
ASV18	Ia	166	87	39	40	1.96973	2.36567	0.64357	1.10709	2.39787	1.85055	5.52005	1.69243	6.92373	6.9305	3.02113	4.90221	9.6084	5.08452	15.9469	2.85427	X	X	X				C			TACGAAGGGACCTAGCGTAGTTCGGAATTACTGGGCTTAAAGAGTTCGTAGGTGGTTGAAAAAGTTGGTGGTGAAATCCCAGAGCTTAACTCTGGAACTGCCATCAAAACTTTTCAGCTAGAGTTTGATAGAGGAAAGCAGAATTTCTAGTGTAGAGGTGAAATTCGTAGATATTAGAAAGAATACCAATTGCGAAGGCAGCTTTCTGGATCATTACTGACACTGAGGAACGAAAGCATGGGTAG
ASV19	Ia	48	11	8	29	0.12553	0.24564	0.02235	0.07869	0.1056	0.22684	0.45502	0.30499	0.38044	0.71709	0.10189	0.3685	0.34865	0.7234	1.24788	0.82136	X									TACGAAGGGACCTAGCGTAGTTCGGAATTACTGGGCTTAAAGAGTTCGTAGGTGGTTGAAAAAGTTGGTGGTGAAATCCCAGAGCTTAACTCTGGAACTGCCATCAAAACTTTTCAGCTAGAGTTTGATAGAGGAAAGCAGAATTTCTAGTGTAGAGGTGAAATTCGTAGATATTAGAAAGAATACCAATTGCGAAGGCAGCTTTCTGGATCAATACTGACACTGAGGAACGAAAGCATGGGTAG
ASV20	Ia	108	82	23	3	0.117	0.13007	0.14865	0.12971	0.12472	0.1352	0.01431	0.05248	0.55971	0.66795	0.72137	0.68611	0.57537	0.67303	0.05908	0.22237	X		X							TACGAAGGGACCTAGCGTAGTTCGGAATTACTGGGCTTAAAGAGTTCGTAGGTGGTTGAAAAAGTTGGTGGTGAAATCCCAGAGCTTAACTCTGGAACTGCCATCAAAACTTTTCAGCTAGAGTTTGATAGAGGAAAGCAGAATTTCTAGTGTAGAGGTGAAATTCGTAGATATTAGAAAGAATACCAAATGCGAAGGCAGCTTTCTGGATCAATACTGACACTGAGGAACGAAAGCATGGGTAG
ASV21	Ia	3	3	0	0	0.00296	0.02512	0.00494	0.03233	0	0	0	0	0.01649	0.14071	0.02749	0.18113	0	0	0	0										TACGAAGGGACCTAGCGTAGTTCGGAATTACTGGGCTTAAAGAGTTCGTAGGTGGTTGAAAAAGTTGGTGGTGAAATCCCAGAGCTTAACTCTGGAACTGCCATCAAAACTTTTCAGCTAGAGTTTGATAGAGGAAAGCAGAATTTCTAGTGTAGAGGTGAAATTCGTAGATATTAGAAAGAATACCGAATGCGAAGGCAGCTTTCTGGATCAATACTGACACTGAGGAACGAAAGCATGGGTAG
ASV22	Ia	20	16	2	2	0.02124	0.07057	0.02874	0.08214	0.01218	0.05449	0.00782	0.03764	0.09876	0.34617	0.14113	0.42187	0.04438	0.19614	0.02606	0.12636			X							TACGAAGGGACCTAGCGTAGTTCGGAATTACTGGGCTTAAAGAGTTCGTAGGTGGTTGAAAAAGTTGGTGGTGAAATCCCAGAGCTTAACTCTGGAACTGCCATCAAAACTTTTCAGCTAGAGTTTGATAGAGGAAAGCAGAATTTCTAGTGTAGAGGTGAAATTCGTAGATATTAGAAAGAATACCGATTGCGAAGGCAGCTTTCTGGATCAATACTGACACTGAGGAACGAAAGCATGGGTAG
ASV23	Ia	2	0	0	2	0.00074	0.00738	0	0	0	0	0.0037	0.01633	0.00185	0.01865	0	0	0	0	0.00927	0.04128										TACGAAGGGACCTAGCGTAGTTCGGAATTACTGGGCTTAAAGAGTTCGTAGGTGGTTGAAAAAGTTGGTGGTGAAATCCCAGAGCTTAACTCTGGAACTGCCATCAAAACTTTTCAGCTAGAGTTTGATAGAGGAAAGTAGAATTTCTAGTGTAGAGGTGAAATTCGTAGATATTAGAAAGAATACCGATTGCGAAGGCAACTTTCTGGATCATTACTGACACTGAGGAACGAAAGCATGGGTAG
ASV24	Ia	2	0	0	2	0.00102	0.01057	0	0	0	0	0.00508	0.02342	0.00292	0.03185	0	0	0	0	0.01458	0.07072										TACGAAGGGACCTAGCGTAGTTCGGAATTACTGGGCTTAAAGAGTTCGTAGGTGGTTGAAATAGTTGGTGGTGAAATCCCAGAGCTTAACTCTGGAACTGCCATCAAAACTTTTCAGCTTGAGTTTGATAGAGGAAAGCAGAATTTCTAGTGTAGAGGTGAAATTCGTAGATATTAGAAAGAATACCAATTGCGAAGGCAGCTTTCTGGATCATTACTGACACTGAGGAACGAAAGCATGGGTAG
ASV25	Ia	9	9	0	0	0.01	0.04712	0.01667	0.06001	0	0	0	0	0.05147	0.24315	0.08578	0.30967	0	0	0	0										TACGAAGGGACCTAGCGTAGTTCGGAATTACTGGGCTTAAAGAGTTCGTAGGTGGTTGAAAAAGTTGGTGGTGAAATCCCAGAGCTTAACTCTGGAACTGCCATCAAAACTTTTCAGCTTGAGTTTGATAGAGGAAAGCAGAATTTCTAGTGTAGAGGTGAAATTCGTAGATATTAGAAAGAATACCAATTGCGAAGGCAGCTTTCTGGATCATTACTGACACTGAGGAACGAAAGCATGGGTAG
ASV26	Ia	2	2	0	0	0.002	0.0201	0.00333	0.02591	0	0	0	0	0.00861	0.08693	0.01435	0.11204	0	0	0	0										TACGAAGGGACCTAGCGTAGTTCGGAATTACTGGGCTTAAAGAGTTCGTAGGTGGTTAAAAAAGTTAGTGGTGAAATCCCAGAGCTTAACTCTGGAACTGCCATTAAAACTTTTTAGCTAGAGTATGATAGAGGAAAGCAGAATTTCTAGTGTAGAGGTGAAATTCGTAGATATTAGAAAGAATACCAATTGCGAAGGCAGCTTTCTGGATCATTACTGACACTGAGGAACGAAAGCATGGGTAG
ASV27	Ib	3	0	0	3	0.00194	0.01691	0	0	0	0	0.0097	0.03716	0.00467	0.04134	0	0	0	0	0.02337	0.09096										TACGAAGGGACCTAGCGTAGTTCGGAATTACTGGGCTTAAAGAGTTCGTAGGTGGTTAAAAAAGTTGGTGGTGAAATCCCAGAGCTTAACTCTGGAACTGCCATCAAAACTTTTTAGCTAGAGTTTGATAGAGGAAAGCAGAATTTCTAGTGTAGAGGTGAAATTCGTAGATATTAGAAAGAATACCAATTGCGAAGGCAGCTTTCTGGATCAATACTGACGCTGAGGAACGAAAGCATGGGTAG
ASV28	Ib	16	0	1	15	0.01331	0.04782	0	0	0.00286	0.0181	0.0637	0.08988	0.03601	0.1324	0	0	0.00774	0.04895	0.17229	0.25137	X									TACGAAGGGACCTAGCGTAGTTCGGAATTACTGGGCTTAAAGAGTTCGTAGGTTGTTAAAAAAGTTGGTGGTGAAATCCCAGAGCTCAACTCTGGAACTGCCATCAAAACTTTTTAGCTAGAGTATGATAGAGGAAAGCAGAATTTCTAGTGTAGAGGTGAAATTCGTAGATATTAGAAAGAATACCAATTGCGAAGGCAGCTTTCTGGATCATTACTGACGCTGAGGAACGAAAGCATGGGTAG
ASV29	Ib	66	8	20	38	0.64607	1.13494	0.02933	0.11514	0.70329	0.93591	2.43907	1.08867	1.98889	3.18389	0.16363	0.6497	2.6405	3.14238	6.81304	2.45099	X	X								TACGAAGGGACCTAGCGTAGTTCGGAATTACTGGGCTTAAAGAGTTCGTAGGTGGTTAAAAAAGTTGGTGGTGAAATCCCAGAGCTTAACTCTGGAACTGCCATCAAAACTTTTTAGCTAGAGTATGATAGAGGAAAGCAGAATTTCTAGTGTAGAGGTGAAATTCGTAGATATTAGAAAGAATACCAATTGCGAAGGCAGCTTTCTGGATCATTACTGACGCTGAGGAACGAAAGCATGGGTAG
ASV30	Ib	30	1	7	22	0.03808	0.09918	0.00105	0.01151	0.03104	0.07783	0.15622	0.15857	0.11113	0.28398	0.00485	0.05314	0.11535	0.27165	0.42576	0.43908	X	X								TACGAAGGGACCTAGCGTAGTTCGGAATTACTGGGCTTAAAGAGTTCGTAGGTGGTTAAAAAAGTTGGTGGTGAAATCCCAGAGCTTAACTCTGGAACTGCCATCAAAACTTTTTAGCTAGAGTTTGATAGAGGAAAGCAGAATTTCTAGTGTAGAGGTGAAATTCGTAGATATTAGAAAGAATACCGATTGCGAAGGCAGCTTTCTGGATCAATACTGACACTGAGGAACGAAAGCATGGGTAG
ASV31	Ib	2	0	0	2	0.00148	0.01485	0	0	0	0	0.00739	0.03287	0.00395	0.03952	0	0	0	0	0.01976	0.08746										TACGAAGGGACCTAGCGTAGTTCGGAATTACTGGGCTTAAAGAGTTCGTAGGTGGTTAAAAAAGTTGGTGGTGAAAGCCCAGAGCTTAACTCTGGAACTGCCATCAAAACTTTTTAGCTAGAGTTTGATAGAGGAAAGCAGAATTTCTAGTGTAGAGGTGAAATTCGTAGATATTAGAAAGAATACCGATTGCGAAGGCAGCTTTCTGGATCATTACTGACACTGAGGAACGAAAGCATGGGTAG
ASV32	Ib	2	0	0	2	0.00074	0.00734	0	0	0	0	0.00368	0.01624	0.00179	0.01783	0	0	0	0	0.00893	0.03945										TACGAAGGGACCTAGCGTAGTTCGGAATTACTGGGCTTAAAGAGTTCGTAGGTGGTTAAAAAAGTTGGTGGTGAAATCCCAGAGCTTAACTCTGGAACTGCCATCAAAACTTTTTAGCTAGAGTGTGATAGAGGAAAGCAGAATTTCTAGTGTAGAGGTGAAATTCGTAGATATTAGAAAGAATACCGATTGCGAAGGCAGCTTTCTGGATCACAACTGACACTGAGGAACGAAAGCATGGGTAG
ASV33	Ib	39	0	8	31	0.13947	0.30306	0	0	0.12233	0.26411	0.57501	0.37973	0.40238	0.85316	0	0	0.42655	0.90742	1.58533	0.97807	X	X		T	T	T				TACGAAGGGACCTAGCGTAGTTCGGAATTACTGGGCTTAAAGAGTTCGTAGGTGGTTAAAAAAGTTGGTGGTGAAATCCCAGAGCTTAACTCTGGAACTGCCATCAAAACTTTTTAGCTAGAGTATGATAGAGGAAAGCAGAATTTCTAGTGTAGAGGTGAAATTCGTAGATATTAGAAAGAATACCGATTGCGAAGGCAGCTTTCTGGATCATTACTGACACTGAGGAACGAAAGCATGGGTAG
ASV34	Ib	111	35	36	40	1.16006	1.65898	0.13748	0.27678	1.56972	1.2243	3.81811	1.2941	3.90112	4.79293	0.6974	1.57615	6.44415	3.87134	10.9693	2.27941	X	X								TACGAAGGGACCTAGCGTAGTTCGGAATTACTGGGCTTAAAGAGTTCGTAGGTGGTTAAAAAAGTTGGTGGTGAAATCCCAGAGCTTAACTCTGGAACTGCCATCAAAACTTTTTAGCTAGAGTATGATAGAGGAAAGCAGAATTTCTAGTGTAGAGGTGAAATTCGTAGATATTAGAAAGAATACCAATTGCGAAGGCAGCTTTCTGGATCATTACTGACACTGAGGAACGAAAGCATGGGTAG
ASV35	Ib	51	1	15	35	0.28271	0.53335	0.00319	0.03491	0.31776	0.49829	1.0862	0.54375	0.83521	1.50873	0.0182	0.19932	1.10184	1.61732	3.01964	1.36268	X	X								TACGAAGGGACCTAGCGTAGTTCGGAATTACTGGGCTTAAAGAGTTCGTAGGTTGTTAAAAAAGTTGGTGGTGAAATCCCAGAGCTTAACTCTGGAACTGCCATCAAAACTTTTTAGCTAGAGTATGATAGAGGAAAGCAGAATTTCTAGTGTAGAGGTGAAATTCGTAGATATTAGAAAGAATACCAATTGCGAAGGCAGCTTTCTGGATCATTACTGACACTGAGGAACGAAAGCATGGGTAG
ASV36	Ib	47	1	12	34	0.14453	0.30703	0.0016	0.01752	0.11951	0.24195	0.59836	0.38311	0.41837	0.83031	0.01062	0.11637	0.43135	0.7876	1.62865	0.91764	X	X	X							TACGAAGGGACCTAGCGTAGTTCGGAATTACTGGGCTTAAAGAGTTCGTAGGTTGTTAAAAAAGTTGGTGGTGAAATCCCAGAGCTTAACTCTGGAACTGCCATCAAAACTTTTTAGCTAGAGTTTGATAGAGGAAAGCAGAATTTCTAGTGTAGAGGTGAAATTCGTAGATATTAGAAAGAATACCAATTGCGAAGGCAGCTTTCTGGATCATTACTGACACTGAGGAACGAAAGCATGGGTAG
ASV37	Ib	13	0	3	10	0.01389	0.06229	0	0	0.01001	0.04743	0.05945	0.1217	0.03687	0.16303	0	0	0.03149	0.1397	0.15286	0.3132	X									TACGAAGGGACCTAGCGTAGTTCGGAATTACTGGGCTTAAAGAGTTCGTAGGTTGTTAAAAAAGTTGGTGGTGAAATCCCAGAGCTTAACTCTGGAACTGCCATCAAAACTTTTTAGCTAGAGTTTGATAGAGGAAAGCAGAATTTCTAGTGTAGAGGTGAAATTCGTAGATATTAGAAAGAATACCAATTGCGAAGGCAGCTTTCTGGATCATAACTGACACTGAGGAACGAAAGCATGGGTAG
ASV38	Ib	2	0	0	2	0.001	0.01026	0	0	0	0	0.00498	0.02272	0.00238	0.02476	0	0	0	0	0.01191	0.05488										TACGAAGGGACCTAGCGTAGTTCGGAATTACTGGGCTTAAAGAGTTCGTAGGTTGTTGAAAAAGTTGGTGGTGAAATCCCAGAGCTTAACTCTGGAACTGCCATCAAAACTTTTTAGCTAGAGCATGATAGAGGAAAGCAGAATTTCTAGTGTAGAGGTGAAATTCGTAGATATTAGAAAGAATACCAATTGCGAAGGCAGCTTTCTGGATCATTGCTGACACTGAGGAACGAAAGCATGGGTAG
ASV39	Ib	8	0	0	8	0.00469	0.02431	0	0	0	0	0.02345	0.05065	0.01241	0.06397	0	0	0	0	0.06204	0.13312										TACGAAGGGACCTAGCGTAGTTCGGAATTACTGGGCTTAAAGAGTTCGTAGGTTGTCAAAAAAGTTGGTGGTGAAATCCCAGAGCTTAACTCTGGAACTGCCATCAAAACTTTTTGGCTAGAGTTTGATAGAGGAAAGCAGAATTTCTAGTGTAGAGGTGAAATTCGTAGATATTAGAAAGAATACCAATTGCGAAGGCAGCTTTCTGGATCATTACTGACACTGAGGAACGAAAGCATGGGTAG
ASV40	Ib	3	0	1	2	0.00602	0.04922	0	0	0.00958	0.06059	0.02051	0.09137	0.01665	0.13918	0	0	0.03646	0.23059	0.04677	0.20853										TACGAAGGGACCTAGCGTAGTTCGGAATTACTGGGCTTAAAGAGTTCGTAGGTGGTTAAAAAAGTTGGTGGTGAAAGCCCAGAGCTTAACTCTGGAACTGCCATCAAAACTTTTTAGCTAGAGTATGATAGAGGAAAGCAGAATTTCTAGTGTAGAGGTGAAATTCGTAGATATTAGAAAGAATACCAATTGCGAAGGCAGCTTTCTGGATCATTACTGACACTGAGGAACGAAAGCATGGGTAG
ASV41	Ib	30	0	6	24	0.05725	0.14595	0	0	0.04761	0.11837	0.23863	0.22529	0.15268	0.38197	0	0	0.1434	0.35874	0.61999	0.56566	X	X								TACGAAGGGACCTAGCGTAGTTCGGAATTACTGGGCTTAAAGAGTTCGTAGGTGGTTAAAAAAGTTGGTAGTGAAATCCCAGAGCTTAACTCTGGAACTGCTATCAAAACTTTTTAGCTAGAGTATGATAGAGGAAAGCAGAATTTCTAGTGTAGAGGTGAAATTCGTAGATATTAGAAAGAATACCAATTGCGAAGGCAGCTTTCTGGATCATTACTGACACTGAGGAACGAAAGCATGGGTAG
ASV42	Ib	6	0	0	6	0.01152	0.0699	0	0	0	0	0.05758	0.14904	0.03196	0.19427	0	0	0	0	0.15979	0.41429										TACGAAGGGACCTAGCGTAGTTCGGAATTACTGGGCTTAAAGAGTTCGTAGGTGGTTAAAAAAGTTGGTAGTGAAATCCCAGAGCTTAACTCTGGAACTGCTATCAAAACTTTTTAGCTAGAGTATGATAGAGGAAAGCAGAATTTCTAGTGTAGAGGTGAAATTCGTAGATATTAGAAAGAATACCAATTGCGAAGGCAGCTTTCTGGATCATTACTGACGCTGAGGAACGAAAGCATGGGTAG
ASV43	Ib	78	12	27	39	0.17894	0.3111	0.00891	0.03416	0.21685	0.28653	0.65114	0.29846	0.55783	0.88134	0.04277	0.17737	0.80518	0.87825	1.85568	0.69969	X	X								TACGAAGGGACCTAGCGTAGTTCGGAATTACTGGGCTTAAAGAGTTCGTAGGTGGTTAAAAAAGTTGGTTGTGAAATCCCGAAGCTTAACTTCGGAACTGCAATCAAAACTTTTTAGCTAGAGTATGATAGAGGAAAGCAGAATTTCTAGTGTAGAGGTGAAATTCGTAGATATTAGAAAGAATACCAATTGCGAAGGCAGCTTTCTGGATCATTACTGACGCTGAGGAACGAAAGCATGGGTAG
ASV44	Ib	6	0	0	6	0.00442	0.02579	0	0	0	0	0.0221	0.0547	0.01076	0.06281	0	0	0	0	0.05381	0.13325										TACGAAGGGACCTAGCGTAGTTCGGAATTACTGGGCTTAAAGAGTTCGTAGGTGGTTAAAATAGTTGGTTGTGAAATCCCGAAGCTTAACTTCGGAACTGCAATCAAAACTTTTTAGCTAGAGTATGATAGAGGAAAGCAGAATTTCTAGTGTAGAGGTGAAATTCGTAGATATTAGAAAGAATACCAATTGCGAAGGCAGCTTTCTGGATCATTACTGACACTGAGGAACGAAAGCATGGGTAG
ASV45	Ib	2	1	0	1	0.00079	0.00902	0.00102	0.01119	0	0	0.0009	0.00567	0.00458	0.058	0.00679	0.07435	0	0	0.00253	0.01601										TACGAAGGGACCTAGCGTAGTTCGGAATTACTGGGCTTAAAGAGTTCGTAGGTGGTTAAAATAGTTGGTTGTGAAATCCCGAAGCTTAACTTCGGAACTGCAATCAAAACTTTTTAGCTAGAGTTTGATAGAGGAAAGCAGAATTTCTAGTGTAGAGGTGAAATTCGTAGATATTAGAAAGAATACCAATTGCGAAGGCAGCTTTCTGGATCATTACTGACACTGAGGAACGAAAGCATGGGTAG
ASV46	Ib	18	0	3	15	0.01909	0.06587	0	0	0.01368	0.05008	0.08175	0.12023	0.04945	0.16631	0	0	0.04157	0.14985	0.20568	0.29334	X	X								TACGAAGGGACCTAGCGTAGTTCGGAATTACTGGGCTTAAAGAGTTCGTAGGTGGTTAAAAAAGTTGGTTGTGAAATCCCGGAGCTTAACTCCGGAACTGCAATCAAAACTTTTTAGCTAGAGTATGATAGAGGAAAGCAGAATTTCTAGTGTAGAGGTGAAATTCGTAGATATTAGAAAGAATACCAATTGCGAAGGCAGCTTTCTGGATCATTACTGACACTGAGGAACGAAAGCATGGGTAG
ASV47	Ia	200	120	40	40	6.65025	2.56842	5.80321	2.00826	8.67823	3.4444	7.16337	1.67177	28.5222	10.9309	27.441	8.59378	38.4066	13.6488	21.8817	7.00069		X	X				C	C.		TACGAAGGGACCTAGCGTAGTTCGGAATTACTGGGCTTAAAGAGTTCGTAGGTGGTTGAAAAAGTTGGTGGTGAAATCCCAGAGCTTAACTCTGGAACTGCCATCAAAACTTTTCAGCTAGAGTATGATAGAGGAAAGCAGAATTTCTAGTGTAGAGGTGAAATTCGTAGATATTAGAAAGAATACCAATTGCGAAGGCAGCTTTCTGGATCATTACTGACACTGAGGAACGAAAGCATGGGTAG
ASV48	Ia	13	11	2	0	0.0209	0.08503	0.02871	0.09665	0.01839	0.08801	0	0	0.09589	0.39771	0.1283	0.4429	0.09457	0.44258	0	0	X	X								TACGAAGGGACCTAGCGTAGTTCGGAATTACTGGGCTTAAAGAGTTCGTAGGTGGTTGAAAAAGTTGGTGGTGAAATCCCAGAGCTTAACTCTGGAACTGCCATCAAAACTTTTCAGCTAGAGTATGATAGAGGAAAGCAGAATTTCTAGTGTAGAGGTGAAATTCGTAGATATTAGAAAGAATACCAAATGCGAAGGCAGCTTTCTGGATCATTACTGACACTGAGGAACGAAAGCATGGGTAG
ASV49	Ia	3	0	0	3	0.00228	0.01895	0	0	0	0	0.01142	0.04154	0.00577	0.04795	0	0	0	0	0.02887	0.10511										TACGAAGGGACCTAGCGTAGTTCGGAATTACTGGGCTTAAAGAGTTCGTAGGTGGTTGAAATAGTTGGTGGTGAAATCCCAGAGCTTAACTCTGGAACTGCCATCAAAACTTTTCAGCTAGAGTGTGATAGAGGAAAGCAGAATTTCTAGTGTAGAGGTGAAATTCGTAGATATTAGAAAGAATACCAATTGCGAAGGCAGCTTTCTGGATCATTACTGACACTGAGGAACGAAAGCATGGGTAG
ASV50	Ia	24	21	3	0	0.02178	0.06877	0.03299	0.08465	0.00993	0.03534	0	0	0.08733	0.26417	0.13175	0.32211	0.0414	0.1531	0	0	X									TACGAAGGGACCTAGCGTAGTTCGGAATTACTGGGCTTAAAGAGTTCGTAGGTTGTTGAAATAGTTGGTGGTGAAATCCCAGAGCTTAACTCTGGAACTGCCATCAAAACTTTTCAGCTAGAGTATGATAGAGGAAAGCAGAATTTCTAGTGTAGAGGTGAAATTCGTAGATATTAGAAAGAATACCAAATGCGAAGGCAGCTTTCTGGATCATTACTGACACTGAGGAACGAAAGCATGGGTAG
ASV51	Ia	2	0	0	2	0.00233	0.02328	0	0	0	0	0.01166	0.05152	0.00705	0.07088	0	0	0	0	0.03524	0.15689										TACGAAGGGACCTAGCGTAGTTCGGAATTACTGGGCTTAAAGAGTTCGTAGGTTGTTGAAATAGTTGGTGGTGAAATCCCAGAGCTTAACTCTGGAACTGCCATCAAAACTTTTCAGCTAGAGTATGATAGAGGAAAGCAGAATTTCTAGTGTAGAGGTGAAATTCGTAGATATTAGAAAGAATACCAATTGCGAAGGCAGCTTTCTGGATCATTACTGACACTGAGGAACGAAAGCATGGGTAG
ASV52	Ia	32	14	10	8	0.06231	0.15259	0.03913	0.11622	0.11812	0.21791	0.07601	0.15834	0.23841	0.5844	0.16007	0.46057	0.50137	0.89471	0.21044	0.45194				C,T,O	C		C,T,O		C,T,O	TACGAAGGGACCTAGCGTAGTTCGGAATTACTGGGCTTAAAGAGTTCGTAGGTGGTTGAAAAAGTTGGTGGTGAAATCCCAGAGCTTAACTCTGGAACTGCCATCAAAGCTTTTCAGCTAGAGTATGATAGAGGAAAGCAGAATTTCTAGTGTAGAGGTGAAATTCGTAGATATTAGAAAGAATACCAATTGCGAAGGCAGCTTTCTGGATCATTACTGACACTGAGGAACGAAAGCATGGGTAG
ASV53	IIb	3	0	0	3	0.00184	0.01599	0	0	0	0	0.00921	0.03515	0.00436	0.03706	0	0	0	0	0.02179	0.08136										TACGAAGGGACCTAGCGTAGTTCGGAATTACTGGGCTTAAAGAGCACGTAGGTGGTTAGAAAAGTTGGTGGTGAAATCCCAAGGCTCAACCTTGGAACTGCCACCAAAACTTTTTAACTAGAGTATGATAGAGGTAAGCGGAATTTCTAGTGTAGAGGTGAAATTCGTAGATATTAGAAAGAACACCAATTGCGAAGGCAGCTTTCTGGATCATTACTGACACTGAGGTGCGAAAGCATGGGTAG
ASV54	IIb	3	0	0	3	0.00038	0.00312	0	0	0	0	0.0019	0.00683	0.00101	0.00824	0	0	0	0	0.00507	0.01804										TACGAAGGGACCTAGCGTAGTTCGGAATTACTGGGCTTAAAGAGCACGTAGGTGGTTAGAAAAGTTAGTGGTGAAATCCCAAGGCTTAACCTTGGAACTGCCACTAAAACTTTTTAACTAGAGTATGATAGAGGTAAGCGGAATTTCTAGTGTAGAGGTGAAATTCGTAGATATTAGAAAGAACACCAATTGCGAAGGCAGCTTTCTGGATCATTACTGACACTGAGGTGCGAAAGCATGGGTAG
ASV55	IIa	23	1	2	20	0.04817	0.14737	0.00227	0.02483	0.01324	0.06099	0.2208	0.25868	0.13518	0.40327	0.01294	0.14174	0.04829	0.22631	0.58877	0.67272	X									TACGAAGGGACCTAGCGTAGTTCGGAATTACTGGGCTTAAAGAGCTCGTAGGTGGTTAAAAAAGTTGGTGGTGAAATCCCAAGGCTTAACCTTGGAACTGCCATCAAAACTTTTTAGCTAGAGTATGATAGAGGAAAGTGGAATTTCTAGTGTAGAGGTGAAATTCGTAGATATTAGAAAGAACACCAAATGCGAAGGCAACTTTCTGGATCATTACTGACACTGAGGAGCGAAAGCATGGGTAG
ASV56	IIa	4	0	0	4	0.00243	0.02245	0	0	0	0	0.01213	0.0495	0.00763	0.0777	0	0	0	0	0.03813	0.17209										TACGAAGGGACCTAGCGTAGTTCGGAATTACTGGGCTTAAAGAGCTCGTAGGTGGTTAAAAAAGTTGATTGTGAAATCCCAAGGCTTAACCTTGGAACTGCAATCAAAACTTTTTAGCTAGAGTGTGATAGAGGAAAGTGGAATTTCTAGTGTAGAGGTGAAATTCGTAGATATTAGAAAGAACACCAAATGCGAAGGCAACTTTCTGGATCATTACTGACACTGAGGAGCGAAAGCATGGGTAG
ASV57	IIa	7	0	2	5	0.01098	0.05984	0	0	0.01356	0.05987	0.04133	0.11561	0.03613	0.19936	0	0	0.06614	0.2948	0.11451	0.32349										TACGAAGGGACCTAGCGTAGTTCGGAATTACTGGGCTTAAAGAGCTCGTAGGTGGTTAAAAAAGTTGGTGGTGAAATCCCAAGGCTTAACCTTGGAACTGCCATCAAAACTTTTTAGCTAGAGTGTGATAGAGGAAAGTGGAATTTCTAGTGTAGAGGTGAAATTCGTAGATATTAGAAAGAACACCAAATGCGAAGGCAACTTTCTGGATCACTACTGACACTGAGGAGCGAAAGCATGGGTAG
ASV58	IIa	49	3	15	31	0.10939	0.22197	0.00154	0.01075	0.14691	0.22815	0.39541	0.27902	0.34882	0.69574	0.00715	0.05183	0.611	0.91353	1.11168	0.77498	X	X								TACGAAGGGACCTAGCGTAGTTCGGAATTACTGGGCTTAAAGAGCTCGTAGGTGGTTAAAAAAGTTGGTGGTGAAATCCCAAGGCTTAACCTTGGAACTGCCATCAAAACTTTTTAGCTTGAGTGTGATAGAGGAAAGTGGAATTTCTAGTGTAGAGGTGAAATTCGTAGATATTAGAAAGAACACCAAATGCGAAGGCAACTTTCTGGATCACTACTGACACTGAGGAGCGAAAGCATGGGTAG
ASV59	IIa	6	0	1	5	0.0108	0.06366	0	0	0.01276	0.08071	0.04124	0.11336	0.03071	0.18618	0	0	0.03811	0.241	0.11545	0.32935										TACGAAGGGACCTAGCGTAGTTCGGAATTACTGGGCTTAAAGAGCTCGTAGGTGGTTAAAAAAGTTGGTGGTGAAATCCCAAGGCTTAACCTTGGAACTGCCATCAAAACTTTTTAGCTTGAGTGTGATAGAGGAAAGTGGAATTTCTAGTGTAGAGGTGAAATTCGTAGATATTAGAAAGAACACCAAATGCGAAGGCAACTTTCTGGATCATTACTGACACTGAGGAGCGAAAGCATGGGTAG
ASV60	IIa	10	1	2	7	0.02586	0.12311	0.00051	0.00561	0.03756	0.16584	0.09022	0.20824	0.06958	0.32833	0.00211	0.02306	0.10471	0.46279	0.23689	0.53877	X	X		O	O		O	O		TACGAAGGGACCTAGCGTAGTTCGGAATTACTGGGCTTAAAGAGCTCGTAGGTGGTTAAAAAAGTTGGTGGTGAAATCCCAAGGCTCAACCTTGGAACTGCCATCAAAACTTTTTAGCTAGAGTGTGATAGAGGAAAGTGGAATTTCTAGTGTAGAGGTGAAATTCGTAGATATTAGAAAGAACACCAAAAGCGAAGGCAACTTTCTGGATCACTACTGACACTGAGGAGCGAAAGCATGGGTAG
ASV61	IIa	7	0	2	5	0.0067	0.04219	0	0	0.00312	0.01379	0.03038	0.09038	0.02051	0.13198	0	0	0.0145	0.06419	0.08803	0.28063										TACGAAGGGATCTAGCGTAGTTCGGAATTACTGGGCTTAAAGAGCTCGTAGGTGGTTAGAAAAGTTGGTGGTGAAATCCCAAGGCTCAACCTTGGAACTGCCATCAAAACTTTTTAGCTAGAGTGTGATAGAGGAAAGTGGAATTTCTAGTGTAGAGGTGAAATTCGTAGATATTAGAAAGAACACCAAAAGCGAAGGCAACTTTCTGGATCACTACTGACACTGAGGAGCGAAAGCATGGGTAG
ASV62	IIa	2	0	0	2	0.00071	0.00729	0	0	0	0	0.00354	0.01615	0.00201	0.02034	0	0	0	0	0.01006	0.04504										TACGAAGGGACCTAGCGTAGTTCGGAATTACTGGGCTTAAAGAGCTCGTAGGTGGTTAAAAAAGTTGATGGTGAAATCCCAAGGCTCAACCTTGGAACTGCCATCAAAACTTTTTAGCTTGAGTGTGATAGAGGAAAGTGGAATTTCTAGTGTAGAGGTGAAATTCGTAGATATTAGAAAGAACATCAAAAGCGAAGGCAACTTTCTGGATCACTACTGACACTGAGGAGCGAAAGCATGGGTAG
ASV63	IIa	3	0	0	3	0.0047	0.04351	0	0	0	0	0.02351	0.09596	0.0127	0.11904	0	0	0	0	0.06348	0.26269										TACGAAGGGACCTAGCGTAGTTCGGAATTACTGGGCTTAAAGAGCTCGTAGGTGGTTAAAAAAGTTGATGGTGAAATCCCAAGGCTCAACCTTGGAACTGCCATCAAAACTGTTTAGCTAGAGTGTGATAGAGGAAAGTGGAATTTCTAGTGTAGAGGTGAAATTCGTAGATATTAGAAAGAACACCAAAAGCGAAGGCAACTTTCTGGATCACTACTGACACTGAGGAGCGAAAGCATGGGTAG
ASV64	IIa	5	0	2	3	0.01384	0.09134	0	0	0.0233	0.11263	0.0459	0.16779	0.04403	0.28805	0	0	0.10354	0.46952	0.11659	0.4335										TACGAAGGGACCTAGCGTAGTTCGGAATTACTGGGCTTAAAGAGCTCGTAGGTGGTTAAAAAAGTTGATGGTGAAATCCCAAGGCTCAACCTTGGAACTGCCATCAAAACTTTTTAGCTAGAGTGTGATAGAGGAAAGTGGAATTTCTAGTGTAGAGGTGAAATTCGTAGATATTAGAAAGAACACCAAAAGCGAAGGCAACTTTCTGGATCACTACTGACACTGAGGAGCGAAAGCATGGGTAG
ASV65	IIa	4	0	0	4	0.00292	0.02125	0	0	0	0	0.0146	0.04614	0.00736	0.05388	0	0	0	0	0.0368	0.11706										TACGAAGGGACCTAGCGTAGTTCGGAATTACTGGGCTTAAAGAGCTCGTAGGTGGTTAGAAAAGTTGATGGTGAAATCCCAAGGCTTAACCTTGGAACTGCCATCAAAACTTTTTAGCTAGAGTGTGATAGAGGAAAGTGGAATTTCTAGTGTAGAGGTGAAATTCGTAGATATTAGAAAGAACACCAAAAGCGAAGGCAACTTTCTGGATCACTACTGACACTGAGGAGCGAAAGCATGGGTAG
ASV66	IIa	18	0	2	16	0.0272	0.09467	0	0	0.01099	0.05699	0.125	0.17358	0.07721	0.26835	0	0	0.04788	0.23785	0.33818	0.47094	X									TACGAAGGGACCTAGCGTAGTTCGGAATTACTGGGCTTAAAGAGCTCGTAGGTGGTTAAAAAAGTTGATGGTGAAATCCCAAGGCTCAACCTTGGAACTGCCATCAAAACTTTTTAGCTAGAGTGTGACAGAGGAAAGTGGAATTTCTAGTGTAGAGGTGAAATTCGTAGATATTAGAAAGAACACCAAAAGCGAAGGCAACTTTCTGGGTCACTACTGACACTGAGGAGCGAAAGCATGGGTAG
ASV67	IIa	12	0	3	9	0.0053	0.02339	0	0	0.00797	0.02942	0.01855	0.04063	0.0145	0.0634	0	0	0.02254	0.08366	0.04997	0.10728										TACGAAGGGACCTAGCGTAGTTCGGAATTACTGGGCTTAAAGAGCTCGTAGGTGGTTAAAATAGTTGATGGTGAAATCCCAAGGCTCAACCTTGGAACTGCCATCAAAACTTTTTAGCTAGAGTATGACAGAGGAAAGTGGAATTTCTAGTGTAGAGGTGAAATTCGTAGATATTAGAAAGAACACCAAAAGCGAAGGCAACTTTCTGGGTCATTACTGACACTGAGGAGCGAAAGCATGGGTAG
ASV68	IIa	5	5	0	0	0.00341	0.02235	0.00568	0.02868	0	0	0	0	0.0162	0.1053	0.027	0.13508	0	0	0	0										TACGAAGGGACCTAGCGTAGTTCGGAATTACTGGGCTTAAAGAGCTCGTAGGTGGTTAAAAAAGTTGATGGTGAAATCCCAAGGCTCAACCTTGGAACTGCCATCAAAACTTTTTAGCTAGAGTATGACAGAGGTAAGTGGAATTTCTAGTGTAGAGGTGAAATTCGTAGATATTAGAAAGAACATCAAAAGCGAAGGCAACTTACTGGGTCACTACTGACACTGAGGAGCGAAAGCATGGGTAG
ASV69	IIa	62	41	7	14	0.12878	0.21389	0.14316	0.21651	0.05829	0.13	0.15612	0.25886	0.49751	0.8447	0.61162	0.9562	0.24107	0.53632	0.41166	0.66952										TACGAAGGGACCTAGCGTAGTTCGGAATTACTGGGCTTAAAGAGCTCGTAGGTGGTTAAAAAAGTTGATGGTGAAATCCCAAGGCTCAACCTTGGAACTGCCATCAAAACTTTTTAGCTAGAGTGTGATAGAGGTAAGTGGAATTTCTAGTGTAGAGGTGAAATTCGTAGATATTAGAAAGAACACCAAAAGCGAAGGCAACTTACTGGGTCACTACTGACACTGAGGAGCGAAAGCATGGGTAG
ASV70	IIa	64	57	6	1	0.1272	0.21511	0.19807	0.24747	0.03879	0.09787	0.003	0.01901	0.56134	0.93552	0.86942	1.06843	0.18877	0.48195	0.00968	0.06123	X	X	X							TACGAAGGGACCTAGCGTAGTTCGGAATTACTGGGCTTAAAGAGCTCGTAGGTGGTTAAAAAAGTTGATGGTGAAATCCCAAGGCTCAACCTTGGAACTGCCATCAAAACTTTTTAGCTAGAGTGTGATAGAGGTAAGTGGAATTTCTAGTGTAGAGGTGAAATTCGTAGATATTAGAAAGAACACCAAATGCGAAGGCAACTTACTGGATCATTACTGACACTGAGGAGCGAAAGCATGGGTAG
ASV71	IIa	39	34	5	0	0.05497	0.12109	0.0796	0.13961	0.03605	0.10003	0	0	0.23274	0.5021	0.33759	0.57776	0.15091	0.41423	0	0	X		X							TACGAAGGGACCTAGCGTAGTTCGGAATTACTGGGCTTAAAGAGCTCGTAGGTGGTTAAAAAAGTTGATGGTGAAATCCCAAGGCTTAACCTTGGAACTGCCATCAAAACTTTTTAGCTAGAGTGTGATAGAGGTAAGTGGAATTTCTAGTGTAGAGGTGAAATTCGTAGATATTAGAAAGAACACCAAATGCGAAGGCAACTTACTGGATCATTACTGACACTGAGGAGCGAAAGCATGGGTAG
ASV72	IIa	6	6	0	0	0.00794	0.0496	0.01323	0.06359	0	0	0	0	0.03379	0.21704	0.05632	0.27838	0	0	0	0										TACGAAGGGACCTAGCGTAGTTCGGAATTACTGGGCTTAAAGAGCTCGTAGGTGGTTAAAAAAGTTGATGGTGAAATCCCAAGGCTCAACCTTGGAACTGCCATCAAAACTTTTTAGCTAGAGTGTGATAGAGGTAAGTGGAATTTCTAGTGTAGAGGTGAAATTCGTAGATATTAGAAAGAACACCAAATGCGAAGGCAACTTACTGGGTCATTACTGACACTGAGGAGCGAAAGCATGGGTAG
ASV73	IIa	8	8	0	0	0.00544	0.02866	0.00907	0.03661	0	0	0	0	0.02755	0.14597	0.04592	0.18649	0	0	0	0										TACGAAGGGACCTAGCGTAGTTCGGAATTACTGGGCTTAAAGAGCTCGTAGGTGGTTAAAATAGTTGATGGTGAAATCCCAAGGCTTAACCTTGGAACTGCCATCAAAACTTTTTAGCTAGAGTGTGATAGAGGTAAGTGGAATTTCTAGTGTAGAGGTGAAATTCGTAGATATTAGAAAGAACACCGAAAGCGAAGGCAACTTACTGGGTCACTACTGACACTGAGGAGCGAAAGCATGGGTAG
ASV74	IIa	61	4	20	37	0.3369	0.57323	0.01724	0.09345	0.4261	0.52775	1.20667	0.52251	1.0487	1.67688	0.08027	0.43453	1.61874	1.81039	3.38394	1.29704	X	X								TACGAAGGGACCTAGCGTAGTTCGGAATTACTGGGCTTAAAGAGCTCGTAGGTGGTTAAAAAAGTTGATGGTGAAATCCCAAGGCTTAACCTTGGAACTGCCATCAAAACTTTTTAGCTAGAGTGTGATAGAGGTAAGTGGAATTTCTAGTGTAGAGGTGAAATTCGTAGATATTAGAAAGAACACCAAATGCGAAGGCAACTTACTGGGTCACTACTGACACTGAGGAGCGAAAGCATGGGTAG
ASV75	IIa	19	1	3	15	0.03843	0.12955	0.00138	0.01508	0.02988	0.10853	0.15814	0.23274	0.10489	0.346	0.00636	0.06963	0.0942	0.3426	0.41118	0.59369	X			T			T		T	TACGAAGGGACCTAGCGTAGTTCGGAATTACTGGGCTTAAAGAGCTCGTAGGTGGTTAAAAAAGTTGATGGTGAAATCCCAAGGCTTAACCTTGGAACTGCCATCAAAACTTTTTAGCTAGAGTGTGATAGAGGTAAGTGGAATTTCTAGTGTAGAGGTGAAATTCGTAGATATTAGAAAGAACATCAAATGCGAAGGCAACTTACTGGGTCACTACTGACACTGAGGAGCGAAAGCATGGGTAG
ASV76	IIa	3	3	0	0	0.00134	0.01091	0.00223	0.01403	0	0	0	0	0.0055	0.04476	0.00916	0.05759	0	0	0	0										TACGAAGGGACCTAGCGTAGTTCGGAATTACTGGGCTTAAAGAGCTCGTAGGTGGTTAAAAAAGTTGATGGTGAAATCCCAAGGCTTAACCTTGGAACTGCCATCAAAACTTTTTAGCTAGAGTGTGACAGAGGTAAGTGGAATTTCTAGTGTAGAGGTGAAATTCGTAGATATTAGAAAGAACACCAAATGCGAAGGCAACTTACTGGGTCACTACTGACACTGAGGAGCGAAAGCATGGGTAG
ASV77	IIa	3	3	0	0	0.00232	0.01906	0.00386	0.02453	0	0	0	0	0.01027	0.08422	0.01712	0.10837	0	0	0	0										TACGAAGGGACCTAGCGTAGTTCGGAATTACTGGGCTTAAAGAGCTCGTAGGTGGTTAAAAAAGTTGATGGTGAAATCCCAAGGCTCAACCTTGGAACTGCCATCAAAACTTTTTAGCTAGAGTGTGACAGAGGTAAGTGGAATTTCTAGTGTAGAGGTGAAATTCGTAGATATTAGAAAGAACACCAAATGCGAAGGCAACTTACTGGGTCACTACTGACACTGAGGAGCGAAAGCATGGGTAG
ASV78	IIa	200	120	40	40	2.02787	0.80865	1.89766	0.70419	1.78495	0.78509	2.6614	0.82636	8.48462	3.03565	8.925	3.23778	7.73517	2.89462	7.91292	2.2687		X	X	C			C			TACGAAGGGACCTAGCGTAGTTCGGAATTACTGGGCTTAAAGAGCTCGTAGGTGGTTAAAAAAGTTGATGGTGAAATCCCAAGGCTCAACCTTGGAACTGCCATCAAAACTTTTTAGCTAGAGTGTGATAGAGGTAAGTGGAATTTCTAGTGTAGAGGTGAAATTCGTAGATATTAGAAAGAACACCAAATGCGAAGGCAACTTACTGGGTCACTACTGACACTGAGGAGCGAAAGCATGGGTAG
ASV79	IIa	15	15	0	0	0.02267	0.08812	0.03778	0.1114	0	0	0	0	0.09829	0.39224	0.16382	0.49644	0	0	0	0	X	X								TACGAAGGGACCTAGCGTAGTTCGGAATTACTGGGCTTAAAGAGCTCGTAGGTGGTTAAAAAAGTTGATGGTGAAATCCCAAGGCTCAACCTTGGAACTGCCATCAAAACTTTTTAGCTAGAGTGTGATAGAGGTAAGTGGAATTTCTAGTGTAGAGGTGAAATTCGTAGATATTAGAAAGAACACCAAATGCGAAGGCAACTTACTGGGTCACAACTGACACTGAGGAGCGAAAGCATGGGTAG
ASV80	IIa	9	0	2	7	0.00219	0.01208	0	0	0.00129	0.00651	0.00965	0.02508	0.00662	0.03894	0	0	0.00432	0.01967	0.02879	0.0819										TACGAAGGGACCTAGCGTAGTTCGGAATTACTGGGCTTAAAGAGCTCGTAGGTGGTTAAAAAAGTTGGTTGTGAAATCCCAAGGCTCAACCTTGGAACTGCAATCAAAACTTTTTAGCTCGAGTGTGACAGAGGAAAGTGGAATTTCTAGTGTAGAGGTGAAATTCGTAGATATTAGAAAGAACATCAAAAGCGAAGGCAACTTTCTGGGTCACTACTGACACTGAGGAGCGAAAGCATGGGTAG
ASV81	IIa	2	0	1	1	0.00135	0.0142	0	0	0.0045	0.02845	0.00226	0.01427	0.0036	0.03917	0	0	0.0129	0.08156	0.00511	0.03232										TACGAAGGGACCTAGCGTAGTTCGGAATTACTGGGCTTAAAGAGCTCGTAGGTGGTTAAAAAAGTTGATTGTGAAATCCCAAGGCTCAACCTTGGAACTGCAATCAAAACTTTTTAGCTAGAGTGTGACAGAGGAAAGTGGAATTTCTAGTGTAGAGGTGAAATTCGTAGATATTAGAAAGAACACCAAAAGCGAAGGCAACTTTCTGGGTCACTACTGACACTGAGGAGCGAAAGCATGGGTAG
ASV82	IIa	8	2	2	4	0.00257	0.0135	0.00088	0.00866	0.00409	0.01805	0.00611	0.01876	0.00722	0.03933	0.0031	0.03032	0.01221	0.05431	0.01459	0.04478										TACGAAGGGACCTAGCGTAGTTCGGAATTACTGGGCTTAAAGAGCTCGTAGGTGGTTAAAAAAGTTGATTGTGAAATCCCAAGGCTCAACCTTGGAACTGCAATCAAAACTTTTTAGCTAGAGTGTGACAGGGGAAAGTGGAATTTCTAGTGTAGAGGTGAAATTCGTAGATATTAGAAAGAACACCAAAAGCGAAGGCAACTTTCTGGGTCACTACTGACACTGAGGAGCGAAAGCATGGGTAG
ASV83	IIa	5	0	1	4	0.00475	0.03044	0	0	0.00486	0.03071	0.0189	0.05924	0.01284	0.08233	0	0	0.01632	0.10322	0.04789	0.14885										TACGAAGGGACCTAGCGTAGTTCGGAATTACTGGGCTTAAAGAGCTCGTAGGTGGTTAAAAAAGTTGATTGTGAAATCCCAAGGCTCAACCTTGGAACTGCAATCAAAACTTTTTAGCTAGAGTGTGATAGAGGAAAGTGGAATTTCTAGTGTAGAGGTGAAATTCGTAGATATTAGAAAGAACACCAAAAGCGAAGGCAACTTTCTGGGTCACTACTGACACTGAGGAGCGAAAGCATGGGTAG
ASV84	IIa	2	0	0	2	0.00176	0.01769	0	0	0	0	0.00881	0.03915	0.0044	0.04422	0	0	0	0	0.022	0.09788										TACGAAGGGACCTAGCGTAGTTCGGAATTACTGGGCTTAAAGAGCTCGTAGGTGGTTAAAAAAGTTGATTGTGAAATCCCAAGGCTCAACCTTGGAACTGCAATCAAAACTTTTTAGCTAGAGTGTGATAGAGGAAAGTGGAATTTCTAGTGTAGAGGTGAAATTCGTAGATATTAGAAAGAACACCAAATGCGAAGGCAACTTTCTGGGTCACTACTGACACTGAGGAGCGAAAGCATGGGTAG
ASV85	IIa	15	1	2	12	0.00605	0.02305	0.00035	0.00382	0.00417	0.0186	0.02502	0.04299	0.01772	0.06986	0.00172	0.01885	0.01398	0.06393	0.06945	0.12722	X									TACGAAGGGACCTAGCGTAGTTCGGAATTACTGGGCTTAAAGAGCTCGTAGGTGGTTAAAAAAGTTGATTGTGAAATCCCAAGGCTCAACCTTGGAACTGCAATCAAAACTTTTTAGCTTGAGTGTGATAGAGGAAAGTGGAATTTCTAGTGTAGAGGTGAAATTCGTAGATATTAGAAAGAACATCAAATGCGAAGGCAACTTTCTGGGTCACTACTGACACTGAGGAGCGAAAGCATGGGTAG
ASV86	IIa	56	3	19	34	0.17177	0.30809	0.00954	0.0639	0.2389	0.30347	0.59133	0.33708	0.55126	0.96588	0.05212	0.34648	0.91339	1.10165	1.68654	0.97847	X	X								TACGAAGGGACCTAGCGTAGTTCGGAATTACTGGGCTTAAAGAGCTCGTAGGTGGTTAAAAAAGTTGATGGTGAAATCCCAAGGCTCAACCTTGGAACTGCCATCAAAACTTTTTAGCTAGAGTGTGATAGAGGAAAGTGGAATTTCTAGTGTAGAGGTGAAATTCGTAGATATTAGAAAGAACACCAAATGCGAAGGCAACTTTCTGGGTCACTACTGACACTGAGGAGCGAAAGCATGGGTAG
ASV87	IIa	12	0	4	8	0.01425	0.07246	0	0	0.02601	0.11117	0.04523	0.11261	0.04542	0.26447	0	0	0.1081	0.50932	0.119	0.28556	X									TACGAAGGGACCTAGCGTAGTTCGGAATTACTGGGCTTAAAGAGCTCGTAGGTGGTTAAAATAGTTGATGGTGAAATCCCAAGGCTCAACCTTGGAACTGCCATCAAAACTTTTTAGCTAGAGTGTGATAGAGGAAAGTGGAATTTCTAGTGTAGAGGTGAAATTCGTAGATATTAGAAAGAACACCAAATGCGAAGGCAACTTTCTGGGTCACTACTGACACTGAGGAGCGAAAGCATGGGTAG
ASV88	IIa	2	0	1	1	0.00302	0.0321	0	0	0.00479	0.0303	0.01031	0.06523	0.00838	0.08424	0	0	0.01823	0.1153	0.02365	0.14955										TACGAAGGGACCTAGCGTAGTTCGGAATTACTGGGCTTAAAGAGCTCGTAGGTGGTTAAAAAAGTTGATGGTGAAATCCCAAGGCTCAACCTTGGAACTGCCATCAAAACTTTTTAGCTAGAGTATGATAGAGGAAAGTGGAATTTCTAGTGTAGAGGTGAAATTCGTAGATATTAGAAAGAACACCAAAAGCGAAGGCAACTTTCTGGATCATTACTGACACTGAGGAGCGAAAGCATGGGTAG
ASV89	IIa	3	0	0	3	0.00145	0.01299	0	0	0	0	0.00723	0.0286	0.00408	0.0383	0	0	0	0	0.02041	0.08453										TACGAAGGGACCTAGCGTAGTTCGGAATTACTGGGCTTAAAGAGCTCGTAGGTGGTTAGAGAAGTTGATGGTGAAATCCCAAGGCTTAACCTTGGAACTGCCATCAAAACTTTTTAGCTAGAGTATGATAGAGGAAAGTGGAATTTCTAGTGTAGAGGTGAAATTCGTAGATATTAGAAAGAACACCAAAAGCGAAGGCAACTTTCTGGATCATTACTGACACTGAGGAGCGAAAGCATGGGTAG
ASV90	IIa	4	0	1	3	0.00446	0.03356	0	0	0.00824	0.05214	0.01404	0.05345	0.01188	0.08949	0	0	0.02323	0.14691	0.0362	0.13455										TACGAAGGGACCTAGCGTAGTTCGGAATTACTGGGCTTAAAGAGCTCGTAGGTGGTTAAAAAAGTTGGTGGTGAAATCCCAAGGCTCAACCTTGGAACTGCCATCAAAACTTTTTAGCTTGAGTGTGATAGAGGAAAGTGGAATTTCTAGTGTAGAGGTGAAATTCGTAGATATTAGAAAGAACACCAAATGCGAAGGCAACTTTCTGGATCATTACTGACACTGAGGAGCGAAAGCATGGGTAG
ASV91	IIa	2	0	0	2	0.00154	0.01796	0	0	0	0	0.00768	0.03997	0.00603	0.07494	0	0	0	0	0.03017	0.16707										TACGAAGGGACCTAGCGTAGTTCGGAATTACTGGGCTTAAAGAGCTCGTAGGTGGTTAAAATAGTTGGTGGTGAAATCCCAAGGCTCAACCTTGGAACTGCCATCAAAACTTTTTAGCTTGAGTATGATAGAGGAAAGTGGAATTTCTAGTGTAGAGGTGAAATTCGTAGATATTAGAAAGAACACCAAATGCGAAGGCAACTTTCTGGATCATTACTGACACTGAGGAGCGAAAGCATGGGTAG
ASV92	IIa	20	1	2	17	0.01883	0.06537	0.00021	0.00228	0.01415	0.07313	0.07938	0.10765	0.05167	0.18577	0.0008	0.0088	0.05161	0.2706	0.20435	0.266	X									TACGAAGGGACCTAGCGTAGTTCGGAATTACTGGGCTTAAAGAGCTCGTAGGTGGTTAGAAAAGTTGGTGGTGAAATCCCAAGGCTCAACCTTGGAACTGCCATCAAAACTTTCTAGCTTGAGTGTGATAGAGGAAAGTGGAATTTCTAGTGTAGAGGTGAAATTCGTAGATATTAGAAAGAACACCAAATGCGAAGGCAACTTTCTGGATCACTACTGACACTGAGGAGCGAAAGCATGGGTAG
ASV93	IIa	2	0	1	1	0.00029	0.00291	0	0	0.00066	0.00416	0.00079	0.00502	0.00099	0.00985	0	0	0.0025	0.01582	0.00243	0.0154										TACGAAGGGACCTAGCGTAGTTCGGAATTACTGGGCTTAAAGAGCTCGTAGGTGGTTAGAAAAGTTGGTGGTGAAATCCCAAGGCTCAACCTTGGAACTGCCATCAAAACTTTCTAGCTAGAGTGTGATAGAGGAAAGTGGAATTTCTAGTGTAGAGGTGAAATTCGTAGATATTAGAAAGAACACCAAATGCGAAGGCAACTTTCTGGATCGCAACTGACACTGAGGAGCGAAAGCATGGGTAG
ASV94	IIa	2	0	0	2	0.00144	0.0144	0	0	0	0	0.00721	0.03187	0.00403	0.04017	0	0	0	0	0.02013	0.08888										TACGAAGGGACCTAGCGTAGTTCGGAATTACTGGGCTTAAAGAGCTCGTAGGTGGTTAGAAAAGTTGGTGGTGAAATCCCAAGGCTCAACCTTGGAACTGCCATCAAAACTTTCTAGCTTGAGTATGATAGAGGAAAGTGGAATTTCTAGTGTAGAGGTGAAATTCGTAGATATTAGAAAGAACACCAAATGCGAAGGCAACTTTCTGGATCATTACTGACACTGAGGAGCGAAAGCATGGGTAG
ASV95	IIa	2	2	0	0	0.00035	0.00352	0.00058	0.00454	0	0	0	0	0.0014	0.01428	0.00233	0.0184	0	0	0	0										TACGAAGGGACCTAGCGTAGTTCGGAATTACTGGGCTTAAAGAGCTCGTAGGTGGTTAAAAAAGTTGGTGGTGAAATCCCAAGGCTCAACCTTGGAACTGCCATCAAAACTTTTTAGCTAGAGTATGATAGAGGTAAGTGGAATTTCTAGTGTAGAGGTGAAATTCGTAGATATTAGAAAGAACACCAAATGCGAAGGCAACTTACTGGATCACTACTGACACTGAGGAGCGAAAGCATGGGTAG
ASV96	Va	163	120	30	13	1.09387	0.94326	1.66256	0.77747	0.35619	0.36755	0.1255	0.21328	5.09319	4.17086	7.70554	3.14504	1.81947	2.05017	0.52985	1.01601	X	X	X		C	C				TACGGAAGGTCCTAGCGTTGTTCGGAATTACTGGGCGTAAAGCGCATGTAGGCGGAACAAAAAGTTAGAAGTGAAATCCCTGGGCTCAACCTAGGAATTGCTTTTAAAACTTTTGTTCTGGAATTCAGGAGAGGAAAATGGAATTTCCAGTGTAGAGGTGAAATTCGTAGATATTGGAAGGAACACCAGTGGCGAAGGCGATTTTCTGGACTGATATTGACGCTGAGATGCGAAGGCATGGGTAG
ASV97	Va	62	2	21	39	0.28623	0.51728	0.00375	0.03075	0.32799	0.46043	1.09194	0.48715	0.86306	1.44739	0.02008	0.17006	1.18548	1.42323	3.06961	1.1353	X	X								TACGGAAGGTCCTAGCGTTGTTCGGAATTACTGGGCGTAAAGCGCATGTAGGCGGAACAGAAAGTTAGAAGTGAAATCCCTGGGCTCAACCTAGGAATTGCTTTTAAAACTTCTGTTCTGGAATTCAGGAGAGGAAAATGGAATTTCCAGTGTAGAGGTGAAATTCGTAGATATTGGAAGGAACACCAGTGGCGAAGGCGATTTTCTGGACTGATATTGACGCTGAGATGCGAAGGCATGGGTAG
ASV98	Va	17	16	1	0	0.00644	0.02301	0.01016	0.02847	0.00174	0.01103	0	0	0.02792	0.10016	0.04321	0.12195	0.00996	0.06296	0	0	X									TACGGAAGGTCCTAGCGTTGTTCGGAATTACTGGGCGTAAAGCGCATGTAGGCGGAACAGAAAGTTAGAAGTGAAATCCCTGGGCTCAACCTAGGAATTGCTTTTAAAACTTCTGTTCTGGAATTCAGGAGAGGAAAATGGAATATCCAGTGTAGAGGTGAAATTCGTAGATATTGGATGGAACACCAGTGGCGAAGGCGATTTTCTGGACTGATATTGACGCTGAGATGCGAAGGCATGGGTAG
ASV99	Vb	126	108	10	8	0.1665	0.20424	0.25871	0.21381	0.03335	0.07086	0.02303	0.05374	0.75431	0.90054	1.18163	0.91639	0.16596	0.38248	0.06067	0.13774	X	X								TACGAAGGGGGCTAGCGTTGTTCGGAATCACTGGGCGTAAAGCGTATGTAGGCGGATCAAAAAGTTAGATGTGAAATCCCTGGGCTCAACCCAGGAACTGCATTTAAAACTAGTGATCTAGAATTTGGTAGGGGTTAGTAGAATTTCCAGTGTAGAGGTGAAATTCGTAGATATTGGAAAGAATACCAGTGGCGAAGGCGACTAACTGGGCCATTTTTGACGCTGAGATACGAAAGCGTGGGTAG
ASV100	Vb	50	32	4	14	0.07035	0.14976	0.05457	0.10705	0.02351	0.07344	0.16455	0.24893	0.24443	0.47958	0.22886	0.44075	0.09966	0.31423	0.43592	0.64981					C			C		TACGAAGGGGGCTAGCGTTGTTCGGAATCACTGGGCGTAAAGCGTATGTAGGCGGATCAAAAAGTTAGATGTGAAATCCCTGGGCTCAACCCAGGAACTGCATTTAAAACTAGTGATCTAGAAATTGGTAAAGGTTAGTAGAATTTCCAGTGTAGAGGTGAAATTCGTAGATATTGGAAAGAATACCAGAAGCGAAGGCGACTAACTAGGCCATTTTTGACGCTGAGATACGAAAGCGTGGGTAG
ASV101	Vb	13	11	0	2	0.00329	0.01349	0.00436	0.01509	0	0	0.00335	0.01481	0.01358	0.06038	0.01964	0.07401	0	0	0.00896	0.03957										TACGAAGGGGGCTAGCGTTGTTCGGAATCACTGGGCGTAAAGCGTATGTAGGCGGATCAAAAAGTTAGATGTGAAATCCCTGGGCTCAACCCAGGAACTGCATTTAAAACTAGTGATCTAGAAATTGGCAAGGGTTAGTAGAAATTCCAGTGTAGAGGTGAAATTCGTAGATATTGGAAAGAATACCAGAAGCGAAGGCGACTAACTAGACCATTTTTGACGCTGAGATACGAAAGCGTGGGTAG
ASV102	Vb	19	1	4	14	0.04247	0.14434	0.00236	0.0258	0.05894	0.19561	0.14636	0.22297	0.11465	0.39085	0.01087	0.1191	0.1676	0.55959	0.37301	0.56442	X	X		T	T		T	T		TACGAAGGGGGCTAGCGTTGTTCGGAATCACTGGGCGTAAAGCGTATGTAGGCGGATCAAAAAGTTAGATGTGAAATCCCTGGGCTCAACCCAGGAACTGCATTTAAAACTAGTGATCTAGAAATTGGTAAGGGTTAGTAGAATTTCCAGTGTAGAGGTGAAATTCGTAGATATTGGAAAGAATACCAGAAGCGAAGGCGACTAACTAGGCCATTTTTGACGCTGAGATACGAAAGCGTGGGTAG
ASV103	Vb	126	68	24	34	0.24574	0.29629	0.14503	0.17273	0.23379	0.31554	0.55983	0.35327	0.9025	0.96811	0.65295	0.75801	0.90594	1.11463	1.64771	1.01269	X				C	C				TACGAAGGGGGCTAGCGTTGTTCGGAATCACTGGGCGTAAAGCGTATGTAGGCGGATCAAAAAGTTAGATGTGAAATCCCTGGGCTCAACCCAGGAACTGCATTTAAAACTAGTGATCTAGAATTTGGTAAGGGTTAGTAGAATTTCCAGTGTAGAGGTGAAATTCGTAGATATTGGAAAGAATACCAGAAGCGAAGGCGACTAACTAGGCCATTTTTGACGCTGAGATACGAAAGCGTGGGTAG
ASV104	Vb	49	9	13	27	0.10307	0.22077	0.0113	0.04475	0.08916	0.17393	0.39226	0.31694	0.32527	0.66468	0.05784	0.23961	0.35351	0.6671	1.0993	0.89371	X	X								TACGAAGGGGGCTAGCGTTGTTCGGAATCACTGGGCGTAAAGCGTATGTAGGCGGATCAAAAAGTTAGATGTGAAATCCCTGGGCTCAACCCAGGAACTGCATTTAAAACTAGTGATCTAGAATTTGGTAAAGGTTAGTAGAATTTCCAGTGTAGAGGTGAAATTCGTAGATATTGGAAAGAATACCAGAAGCGAAGGCGACTAACTAGGCCATTTTTGACGCTGAGATACGAAAGCGTGGGTAG
ASV105	Vb	7	7	0	0	0.00371	0.02338	0.00618	0.02997	0	0	0	0	0.01394	0.08528	0.02324	0.10929	0	0	0	0										TACGAAGGGGGCTAGCGTTGTTCGGAATCACTGGGCGTAAAGCGTATGTAGGCGGATCAAAAAGTTAGATGTGAAATCCCTGGGCTCAACCCAGGAACTGCATTTAAAACTAGTGATCTAGAAATTGGTAGAGGTTAGTAGAATTTCCAGTGTAGAGGTGAAATTCGTAGATATTGGAAAGAATACCAGAAGCGAAGGCGACTAACTAGGCCATTTTTGACGCTGAGATACGAAAGCGTGGGTAG
ASV106	Vb	2	0	0	2	0.00078	0.00797	0	0	0	0	0.00388	0.01765	0.00217	0.02329	0	0	0	0	0.01086	0.05167										TACGGAGGGGGCTAGCGTTGTTCGGAATTACTGGGCGTAAAGCGTATGTAGGCGGATCAAAAAGTTAGATGTGAAATCCCTGGGCTTAACCTAGGAACTGCATTTAAAACTAGTGATCTAGAATTTGGTAGGGGTTAGTAGAATTTCCAGTGTAGAGGTGAAATTCGTAGATATTGGAAAGAATACCAGTGGCGAAGGCGACTAACTGGGCCATTTTTGACGCTGAGATACGAAAGCGTGGGTAG

## Sheet: Table_S9
Table S9. Summary of KByT ASVs that match isolated SAR11 strains.
References	ASV	Subclade
HTCC1062, HTCC1002, HTCC9565, RS39, HTCC1016, HTCC1013, HTCC1040, HIMB1412, HIMB1420, HIMB1436, HIMB1444, HIMB1456, HIMB2201, HIMB2247, HIMB2250	ASV47*	Ia
HIMB140, HTCC7211, HTCC7214, HTCC8051, HIMB4, HTCC7217, HIMB1321, HTCC9022, HIMB1430c, HIMB2211	ASV16*	Ia
HIMB1402, HIMB1437, HIMB1835, HIMB1838, HIMB1863, HIMB2187, HIMB2200, HIMB2204, HIMB2215, HIMB2226	ASV18*	Ia
HIMB1427	ASV20	Ia
HIMB83	ASV50	Ia
HIMB1463	ASV22	Ia
HIMB2304	ASV12	Ia
RS40	ASV43*	Ib
HIMB58	ASV78*	IIa
HIMB114	ASV11*	IIIa
HIMB59	ASV96*	Va
aASVs with asterisks (*) represent ASVs that are highly abundant within our dataset.
